# Supplementary material for: A systematic pan-cancer study on deep learning-based prediction of multi-omic biomarkers from routine pathology images
Source: PubMed Central journal article supplement (PMC10942985; doi:10.1038/s43856-024-00471-5), 2024-03-15
Supplement: 43856_2024_471_MOESM2_ESM.pdf [file 43856_2024_471_MOESM2_ESM.pdf]

1 **Description of Additional Supplementary Files**

2

3 **File Name:** Supplementary Data 1

4 **Description:** AUC values, class prevalence, validation sample size, corrected p-values, and  
5 other relevant information for all models evaluated in the study.

6
