# Supplementary material for: A systematic pan-cancer study on deep learning-based prediction of multi-omic biomarkers from routine pathology images
Source: Commun Med (Lond). 2024 Mar 15;4:48. doi: 10.1038/s43856-024-00471-5 (PMC10942985; doi:10.1038/s43856-024-00471-5)
Supplement: Supplementary file 3 — Supplementary Data 1 [file 43856_2024_471_MOESM3_ESM.xlsx]

## Sheet: Supp Data Table 1
Cancer Abbr.	Biomarker Type	Biomarker	AUC	# Total Samples	Positive Ratio	Fold	# Samples per Fold	Positive Ratio per Fold	p-value	Corrected p-value
TCGA-ACC	Presence of SNV mutations	ERCC2	0.415385	225	0.288889	0	80	0.2625	0.058178	0.12971
TCGA-ACC	Presence of SNV mutations	ERCC2	0.784615	225	0.288889	1	84	0.297619	0.058178	0.12971
TCGA-ACC	Presence of SNV mutations	ERCC2	0.707692	225	0.288889	2	61	0.311475	0.058178	0.12971
TCGA-ACC	Presence of SNV mutations	TP53	0.482143	225	0.2	0	79	0.253165	0.508894	0.676667
TCGA-ACC	Presence of SNV mutations	TP53	0.571429	225	0.2	1	82	0.207317	0.508894	0.676667
TCGA-ACC	Presence of SNV mutations	TP53	0.625	225	0.2	2	64	0.125	0.508894	0.676667
TCGA-ACC	Clinical outcomes and treatment responses	DSS	0.513889	217	0.290323	0	86	0.348837	0.000210548	0.001209
TCGA-ACC	Clinical outcomes and treatment responses	DSS	0.883333	217	0.290323	1	76	0.328947	0.000210548	0.001209
TCGA-ACC	Clinical outcomes and treatment responses	DSS	0.95	217	0.290323	2	55	0.145455	0.000210548	0.001209
TCGA-ACC	Clinical outcomes and treatment responses	OS	0.833333	225	0.315556	0	79	0.379747	6.53602e-06	6.01523e-05
TCGA-ACC	Clinical outcomes and treatment responses	OS	0.736111	225	0.315556	1	83	0.337349	6.53602e-06	6.01523e-05
TCGA-ACC	Clinical outcomes and treatment responses	OS	0.972222	225	0.315556	2	63	0.206349	6.53602e-06	6.01523e-05
TCGA-ACC	Clinical outcomes and treatment responses	PFI	0.740741	225	0.457778	0	79	0.518987	0.000529216	0.00267655
TCGA-ACC	Clinical outcomes and treatment responses	PFI	0.716049	225	0.457778	1	82	0.463415	0.000529216	0.00267655
TCGA-ACC	Clinical outcomes and treatment responses	PFI	0.888889	225	0.457778	2	64	0.375	0.000529216	0.00267655
TCGA-ACC	Clinical outcomes and treatment responses	residual_tumor	0.653846	208	0.221154	0	81	0.246914	0.274159	0.433671
TCGA-ACC	Clinical outcomes and treatment responses	residual_tumor	0.788462	208	0.221154	1	72	0.25	0.274159	0.433671
TCGA-ACC	Clinical outcomes and treatment responses	residual_tumor	0.5	208	0.221154	2	55	0.145455	0.274159	0.433671
TCGA-ACC	Clinical outcomes and treatment responses	treatment_response	0.909091	178	0.735955	0	72	0.722222	0.0218152	0.059177
TCGA-ACC	Clinical outcomes and treatment responses	treatment_response	0.818182	178	0.735955	1	69	0.724638	0.0218152	0.059177
TCGA-ACC	Clinical outcomes and treatment responses	treatment_response	0.6	178	0.735955	2	37	0.783784	0.0218152	0.059177
TCGA-ACC	Transcriptome under/over expression	ACSL6_OVER	0.8	222	0.265766	0	85	0.294118	0.000247496	0.00139337
TCGA-ACC	Transcriptome under/over expression	ACSL6_OVER	0.846154	222	0.265766	1	78	0.230769	0.000247496	0.00139337
TCGA-ACC	Transcriptome under/over expression	ACSL6_OVER	0.884615	222	0.265766	2	59	0.271186	0.000247496	0.00139337
TCGA-ACC	Transcriptome under/over expression	AFF4_OVER	0.769231	222	0.279279	0	80	0.225	0.00569254	0.0196828
TCGA-ACC	Transcriptome under/over expression	AFF4_OVER	0.892308	222	0.279279	1	83	0.289157	0.00569254	0.0196828
TCGA-ACC	Transcriptome under/over expression	AFF4_OVER	0.816667	222	0.279279	2	59	0.338983	0.00569254	0.0196828
TCGA-ACC	Transcriptome under/over expression	AKT2_OVER	0.753846	222	0.265766	0	77	0.272727	0.00453492	0.0162926
TCGA-ACC	Transcriptome under/over expression	AKT2_OVER	0.707692	222	0.265766	1	86	0.255814	0.00453492	0.0162926
TCGA-ACC	Transcriptome under/over expression	AKT2_OVER	0.716667	222	0.265766	2	59	0.271186	0.00453492	0.0162926
TCGA-ACC	Transcriptome under/over expression	APC_OVER	0.676923	222	0.283784	0	79	0.265823	0.253469	0.41017
TCGA-ACC	Transcriptome under/over expression	APC_OVER	0.738462	222	0.283784	1	84	0.297619	0.253469	0.41017
TCGA-ACC	Transcriptome under/over expression	APC_OVER	0.533333	222	0.283784	2	59	0.288136	0.253469	0.41017
TCGA-ACC	Transcriptome under/over expression	AR_OVER	0.589286	222	0.211712	0	79	0.202532	0.642058	0.785235
TCGA-ACC	Transcriptome under/over expression	AR_OVER	0.589286	222	0.211712	1	84	0.238095	0.642058	0.785235
TCGA-ACC	Transcriptome under/over expression	AR_OVER	0.642857	222	0.211712	2	59	0.186441	0.642058	0.785235
TCGA-ACC	Transcriptome under/over expression	BRAF_OVER	0.716667	222	0.207207	0	85	0.247059	0.535917	0.697161
TCGA-ACC	Transcriptome under/over expression	BRAF_OVER	0.904762	222	0.207207	1	78	0.179487	0.535917	0.697161
TCGA-ACC	Transcriptome under/over expression	BRAF_OVER	0.357143	222	0.207207	2	59	0.186441	0.535917	0.697161
TCGA-ACC	Transcriptome under/over expression	CCNE1_OVER	0.433333	222	0.157658	0	82	0.182927	0.681305	0.811326
TCGA-ACC	Transcriptome under/over expression	CCNE1_OVER	0.666667	222	0.157658	1	81	0.17284	0.681305	0.811326
TCGA-ACC	Transcriptome under/over expression	CCNE1_OVER	0.595238	222	0.157658	2	59	0.101695	0.681305	0.811326
TCGA-ACC	Transcriptome under/over expression	CDK4_OVER	0.75641	222	0.324324	0	85	0.317647	0.00260226	0.0102239
TCGA-ACC	Transcriptome under/over expression	CDK4_OVER	0.766667	222	0.324324	1	78	0.320513	0.00260226	0.0102239
TCGA-ACC	Transcriptome under/over expression	CDK4_OVER	0.7	222	0.324324	2	59	0.338983	0.00260226	0.0102239
TCGA-ACC	Transcriptome under/over expression	CEP89_OVER	0.678571	222	0.202703	0	78	0.24359	0.127177	0.24136
TCGA-ACC	Transcriptome under/over expression	CEP89_OVER	0.589286	222	0.202703	1	85	0.235294	0.127177	0.24136
TCGA-ACC	Transcriptome under/over expression	CEP89_OVER	0.809524	222	0.202703	2	59	0.101695	0.127177	0.24136
TCGA-ACC	Transcriptome under/over expression	CRTC1_OVER	0.5	222	0.184685	0	79	0.202532	0.495304	0.665523
TCGA-ACC	Transcriptome under/over expression	CRTC1_OVER	0.607143	222	0.184685	1	84	0.166667	0.495304	0.665523
TCGA-ACC	Transcriptome under/over expression	CRTC1_OVER	0.404762	222	0.184685	2	59	0.186441	0.495304	0.665523
TCGA-ACC	Transcriptome under/over expression	CYLD_OVER	0.45	222	0.207207	0	84	0.190476	0.749139	0.856676
TCGA-ACC	Transcriptome under/over expression	CYLD_OVER	0.52381	222	0.207207	1	79	0.189873	0.749139	0.856676
TCGA-ACC	Transcriptome under/over expression	CYLD_OVER	0.666667	222	0.207207	2	59	0.254237	0.749139	0.856676
TCGA-ACC	Transcriptome under/over expression	EBF1_OVER	0.784615	222	0.279279	0	86	0.290698	0.37155	0.545479
TCGA-ACC	Transcriptome under/over expression	EBF1_OVER	0.4	222	0.279279	1	77	0.220779	0.37155	0.545479
TCGA-ACC	Transcriptome under/over expression	EBF1_OVER	0.480769	222	0.279279	2	59	0.338983	0.37155	0.545479
TCGA-ACC	Transcriptome under/over expression	ERC1_OVER	0.9	222	0.256757	0	84	0.261905	3.80485e-07	4.91582e-06
TCGA-ACC	Transcriptome under/over expression	ERC1_OVER	0.961538	222	0.256757	1	79	0.253165	3.80485e-07	4.91582e-06
TCGA-ACC	Transcriptome under/over expression	ERC1_OVER	0.865385	222	0.256757	2	59	0.254237	3.80485e-07	4.91582e-06
TCGA-ACC	Transcriptome under/over expression	ERCC4_OVER	0.829545	222	0.436937	0	85	0.388235	0.0484373	0.112407
TCGA-ACC	Transcriptome under/over expression	ERCC4_OVER	0.614286	222	0.436937	1	78	0.423077	0.0484373	0.112407
TCGA-ACC	Transcriptome under/over expression	ERCC4_OVER	0.628571	222	0.436937	2	59	0.525424	0.0484373	0.112407
TCGA-ACC	Transcriptome under/over expression	ETNK1_OVER	0.688312	222	0.405405	0	83	0.373494	0.00865209	0.027946
TCGA-ACC	Transcriptome under/over expression	ETNK1_OVER	0.818182	222	0.405405	1	80	0.4	0.00865209	0.027946
TCGA-ACC	Transcriptome under/over expression	ETNK1_OVER	0.714286	222	0.405405	2	59	0.457627	0.00865209	0.027946
TCGA-ACC	Transcriptome under/over expression	FANCC_OVER	0.916667	222	0.166667	0	84	0.238095	2.19533e-05	0.000171668
TCGA-ACC	Transcriptome under/over expression	FANCC_OVER	0.928571	222	0.166667	1	78	0.179487	2.19533e-05	0.000171668
TCGA-ACC	Transcriptome under/over expression	FANCC_OVER	0.761905	222	0.166667	2	60	0.05	2.19533e-05	0.000171668
TCGA-ACC	Transcriptome under/over expression	FUS_OVER	0.433333	222	0.166667	0	88	0.227273	0.501505	0.670725
TCGA-ACC	Transcriptome under/over expression	FUS_OVER	0.809524	222	0.166667	1	79	0.126582	0.501505	0.670725
TCGA-ACC	Transcriptome under/over expression	FUS_OVER	0.595238	222	0.166667	2	55	0.127273	0.501505	0.670725
TCGA-ACC	Transcriptome under/over expression	HERPUD1_OVER	0.566667	222	0.220721	0	84	0.238095	0.471315	0.644461
TCGA-ACC	Transcriptome under/over expression	HERPUD1_OVER	0.785714	222	0.220721	1	79	0.189873	0.471315	0.644461
TCGA-ACC	Transcriptome under/over expression	HERPUD1_OVER	0.428571	222	0.220721	2	59	0.237288	0.471315	0.644461
TCGA-ACC	Transcriptome under/over expression	HOOK3_OVER	0.732143	222	0.220721	0	79	0.21519	0.0421645	0.100869
TCGA-ACC	Transcriptome under/over expression	HOOK3_OVER	0.75	222	0.220721	1	84	0.202381	0.0421645	0.100869
TCGA-ACC	Transcriptome under/over expression	HOOK3_OVER	0.714286	222	0.220721	2	59	0.254237	0.0421645	0.100869
TCGA-ACC	Transcriptome under/over expression	KAT6A_OVER	0.696429	222	0.207207	0	79	0.253165	0.260044	0.418124
TCGA-ACC	Transcriptome under/over expression	KAT6A_OVER	0.410714	222	0.207207	1	84	0.190476	0.260044	0.418124
TCGA-ACC	Transcriptome under/over expression	KAT6A_OVER	0.809524	222	0.207207	2	59	0.169492	0.260044	0.418124
TCGA-ACC	Transcriptome under/over expression	KIAA1549_OVER	0.371429	222	0.220721	0	84	0.261905	0.822818	0.902829
TCGA-ACC	Transcriptome under/over expression	KIAA1549_OVER	0.557692	222	0.220721	1	79	0.202532	0.822818	0.902829
TCGA-ACC	Transcriptome under/over expression	KIAA1549_OVER	0.653846	222	0.220721	2	59	0.186441	0.822818	0.902829
TCGA-ACC	Transcriptome under/over expression	KMT2D_OVER	0.678571	222	0.18018	0	80	0.2125	0.0215838	0.0587075
TCGA-ACC	Transcriptome under/over expression	KMT2D_OVER	0.732143	222	0.18018	1	83	0.192771	0.0215838	0.0587075
TCGA-ACC	Transcriptome under/over expression	KMT2D_OVER	0.738095	222	0.18018	2	59	0.118644	0.0215838	0.0587075
TCGA-ACC	Transcriptome under/over expression	LRIG3_OVER	0.820513	222	0.310811	0	84	0.321429	0.0287419	0.0740785
TCGA-ACC	Transcriptome under/over expression	LRIG3_OVER	0.6	222	0.310811	1	79	0.265823	0.0287419	0.0740785
TCGA-ACC	Transcriptome under/over expression	LRIG3_OVER	0.716667	222	0.310811	2	59	0.355932	0.0287419	0.0740785
TCGA-ACC	Transcriptome under/over expression	LSM14A_OVER	0.8	222	0.243243	0	87	0.241379	0.0627845	0.137702
TCGA-ACC	Transcriptome under/over expression	LSM14A_OVER	0.8	222	0.243243	1	82	0.219512	0.0627845	0.137702
TCGA-ACC	Transcriptome under/over expression	LSM14A_OVER	0.483333	222	0.243243	2	53	0.283019	0.0627845	0.137702
TCGA-ACC	Transcriptome under/over expression	MAP2K2_OVER	0.483333	222	0.175676	0	85	0.152941	0.396595	0.571771
TCGA-ACC	Transcriptome under/over expression	MAP2K2_OVER	0.52381	222	0.175676	1	78	0.192308	0.396595	0.571771
TCGA-ACC	Transcriptome under/over expression	MAP2K2_OVER	0.666667	222	0.175676	2	59	0.186441	0.396595	0.571771
TCGA-ACC	Transcriptome under/over expression	MAP3K1_OVER	0.55	222	0.22973	0	85	0.247059	0.140213	0.259146
TCGA-ACC	Transcriptome under/over expression	MAP3K1_OVER	0.857143	222	0.22973	1	78	0.192308	0.140213	0.259146
TCGA-ACC	Transcriptome under/over expression	MAP3K1_OVER	0.547619	222	0.22973	2	59	0.254237	0.140213	0.259146
TCGA-ACC	Transcriptome under/over expression	MDM2_OVER	0.607143	222	0.234234	0	80	0.2125	0.340775	0.511606
TCGA-ACC	Transcriptome under/over expression	MDM2_OVER	0.535714	222	0.234234	1	83	0.240964	0.340775	0.511606
TCGA-ACC	Transcriptome under/over expression	MDM2_OVER	0.809524	222	0.234234	2	59	0.254237	0.340775	0.511606
TCGA-ACC	Transcriptome under/over expression	NACA_OVER	0.528571	222	0.252252	0	88	0.284091	0.510619	0.677967
TCGA-ACC	Transcriptome under/over expression	NACA_OVER	0.538462	222	0.252252	1	75	0.2	0.510619	0.677967
TCGA-ACC	Transcriptome under/over expression	NACA_OVER	0.75	222	0.252252	2	59	0.271186	0.510619	0.677967
TCGA-ACC	Transcriptome under/over expression	NBN_OVER	0.696429	222	0.220721	0	80	0.225	0.00643589	0.0217643
TCGA-ACC	Transcriptome under/over expression	NBN_OVER	0.767857	222	0.220721	1	83	0.240964	0.00643589	0.0217643
TCGA-ACC	Transcriptome under/over expression	NBN_OVER	0.761905	222	0.220721	2	59	0.186441	0.00643589	0.0217643
TCGA-ACC	Transcriptome under/over expression	NIN_OVER	0.714286	222	0.207207	0	79	0.202532	0.463585	0.636916
TCGA-ACC	Transcriptome under/over expression	NIN_OVER	0.732143	222	0.207207	1	84	0.22619	0.463585	0.636916
TCGA-ACC	Transcriptome under/over expression	NIN_OVER	0.357143	222	0.207207	2	59	0.186441	0.463585	0.636916
TCGA-ACC	Transcriptome under/over expression	NPM1_OVER	0.733333	222	0.18018	0	88	0.181818	0.61632	0.764897
TCGA-ACC	Transcriptome under/over expression	NPM1_OVER	0.738095	222	0.18018	1	77	0.155844	0.61632	0.764897
TCGA-ACC	Transcriptome under/over expression	NPM1_OVER	0.52381	222	0.18018	2	57	0.210526	0.61632	0.764897
TCGA-ACC	Transcriptome under/over expression	OLIG2_OVER	0.816667	222	0.162162	0	85	0.152941	0.00235304	0.00941916
TCGA-ACC	Transcriptome under/over expression	OLIG2_OVER	0.928571	222	0.162162	1	78	0.115385	0.00235304	0.00941916
TCGA-ACC	Transcriptome under/over expression	OLIG2_OVER	0.880952	222	0.162162	2	59	0.237288	0.00235304	0.00941916
TCGA-ACC	Transcriptome under/over expression	PIK3R1_OVER	0.553571	222	0.216216	0	79	0.164557	0.34875	0.520286
TCGA-ACC	Transcriptome under/over expression	PIK3R1_OVER	0.714286	222	0.216216	1	84	0.238095	0.34875	0.520286
TCGA-ACC	Transcriptome under/over expression	PIK3R1_OVER	0.690476	222	0.216216	2	59	0.254237	0.34875	0.520286
TCGA-ACC	Transcriptome under/over expression	POLE_OVER	0.607143	222	0.171171	0	77	0.194805	0.922958	0.956282
TCGA-ACC	Transcriptome under/over expression	POLE_OVER	0.464286	222	0.171171	1	86	0.232558	0.922958	0.956282
TCGA-ACC	Transcriptome under/over expression	POLE_OVER	0.547619	222	0.171171	2	59	0.0508475	0.922958	0.956282
TCGA-ACC	Transcriptome under/over expression	PPP6C_OVER	0.571429	222	0.265766	0	84	0.297619	0.666433	0.803587
TCGA-ACC	Transcriptome under/over expression	PPP6C_OVER	0.615385	222	0.265766	1	79	0.240506	0.666433	0.803587
TCGA-ACC	Transcriptome under/over expression	PPP6C_OVER	0.384615	222	0.265766	2	59	0.254237	0.666433	0.803587
TCGA-ACC	Transcriptome under/over expression	PWWP2A_OVER	0.822222	222	0.504505	0	87	0.425287	9.32954e-05	0.000608678
TCGA-ACC	Transcriptome under/over expression	PWWP2A_OVER	0.875	222	0.504505	1	72	0.486111	9.32954e-05	0.000608678
TCGA-ACC	Transcriptome under/over expression	PWWP2A_OVER	0.708333	222	0.504505	2	63	0.634921	9.32954e-05	0.000608678
TCGA-ACC	Transcriptome under/over expression	RAC1_OVER	0.607143	222	0.211712	0	79	0.253165	0.120871	0.232235
TCGA-ACC	Transcriptome under/over expression	RAC1_OVER	0.589286	222	0.211712	1	84	0.238095	0.120871	0.232235
TCGA-ACC	Transcriptome under/over expression	RAC1_OVER	0.596154	222	0.211712	2	59	0.118644	0.120871	0.232235
TCGA-ACC	Transcriptome under/over expression	RAD21_OVER	0.732143	222	0.234234	0	79	0.253165	0.368979	0.542435
TCGA-ACC	Transcriptome under/over expression	RAD21_OVER	0.660714	222	0.234234	1	84	0.190476	0.368979	0.542435
TCGA-ACC	Transcriptome under/over expression	RAD21_OVER	0.403846	222	0.234234	2	59	0.271186	0.368979	0.542435
TCGA-ACC	Transcriptome under/over expression	SBDS_OVER	0.660714	222	0.22973	0	84	0.238095	0.563702	0.720673
TCGA-ACC	Transcriptome under/over expression	SBDS_OVER	0.5	222	0.22973	1	79	0.189873	0.563702	0.720673
TCGA-ACC	Transcriptome under/over expression	SBDS_OVER	0.461538	222	0.22973	2	59	0.271186	0.563702	0.720673
TCGA-ACC	Transcriptome under/over expression	SOCS1_OVER	0.55	222	0.157658	0	85	0.152941	0.644441	0.785859
TCGA-ACC	Transcriptome under/over expression	SOCS1_OVER	0.428571	222	0.157658	1	78	0.192308	0.644441	0.785859
TCGA-ACC	Transcriptome under/over expression	SOCS1_OVER	0.785714	222	0.157658	2	59	0.118644	0.644441	0.785859
TCGA-ACC	Transcriptome under/over expression	STK11_OVER	0.516667	222	0.148649	0	88	0.136364	0.148073	0.270818
TCGA-ACC	Transcriptome under/over expression	STK11_OVER	0.785714	222	0.148649	1	75	0.133333	0.148073	0.270818
TCGA-ACC	Transcriptome under/over expression	STK11_OVER	0.666667	222	0.148649	2	59	0.186441	0.148073	0.270818
TCGA-ACC	Transcriptome under/over expression	TCEA1_OVER	0.883333	222	0.171171	0	84	0.238095	0.113416	0.221287
TCGA-ACC	Transcriptome under/over expression	TCEA1_OVER	0.642857	222	0.171171	1	79	0.139241	0.113416	0.221287
TCGA-ACC	Transcriptome under/over expression	TCEA1_OVER	0.595238	222	0.171171	2	59	0.118644	0.113416	0.221287
TCGA-ACC	Transcriptome under/over expression	TFE3_OVER	0.816667	222	0.193694	0	85	0.2	0.0288293	0.0742562
TCGA-ACC	Transcriptome under/over expression	TFE3_OVER	0.595238	222	0.193694	1	78	0.192308	0.0288293	0.0742562
TCGA-ACC	Transcriptome under/over expression	TFE3_OVER	0.5	222	0.193694	2	59	0.186441	0.0288293	0.0742562
TCGA-ACC	Transcriptome under/over expression	TRRAP_OVER	0.553846	222	0.243243	0	83	0.253012	0.635196	0.779444
TCGA-ACC	Transcriptome under/over expression	TRRAP_OVER	0.784615	222	0.243243	1	80	0.2625	0.635196	0.779444
TCGA-ACC	Transcriptome under/over expression	TRRAP_OVER	0.423077	222	0.243243	2	59	0.20339	0.635196	0.779444
TCGA-ACC	Transcriptome under/over expression	WRN_OVER	0.85	222	0.193694	0	85	0.2	0.0245847	0.0654997
TCGA-ACC	Transcriptome under/over expression	WRN_OVER	0.785714	222	0.193694	1	78	0.141026	0.0245847	0.0654997
TCGA-ACC	Transcriptome under/over expression	WRN_OVER	1	222	0.193694	2	59	0.254237	0.0245847	0.0654997
TCGA-ACC	Transcriptome under/over expression	ZNF384_OVER	0.738462	222	0.220721	0	79	0.278481	8.48975e-05	0.00056102
TCGA-ACC	Transcriptome under/over expression	ZNF384_OVER	0.892308	222	0.220721	1	84	0.22619	8.48975e-05	0.00056102
TCGA-ACC	Transcriptome under/over expression	ZNF384_OVER	0.788462	222	0.220721	2	59	0.135593	8.48975e-05	0.00056102
TCGA-BLCA	Presence of SNV mutations	ABL1	0.310976	449	0.0222717	0	174	0.0229885	0.29598	0.461189
TCGA-BLCA	Presence of SNV mutations	ABL1	0.338753	449	0.0222717	1	149	0.0201342	0.29598	0.461189
TCGA-BLCA	Presence of SNV mutations	ABL1	0.42623	449	0.0222717	2	126	0.0238095	0.29598	0.461189
TCGA-BLCA	Presence of SNV mutations	AFF1	0.560606	449	0.0378619	0	173	0.0404624	0.778675	0.876526
TCGA-BLCA	Presence of SNV mutations	AFF1	0.350413	449	0.0378619	1	150	0.0333333	0.778675	0.876526
TCGA-BLCA	Presence of SNV mutations	AFF1	0.758333	449	0.0378619	2	126	0.0396825	0.778675	0.876526
TCGA-BLCA	Presence of SNV mutations	AFF3	0.60119	449	0.0601336	0	174	0.0804598	0.917217	0.953404
TCGA-BLCA	Presence of SNV mutations	AFF3	0.469388	449	0.0601336	1	149	0.0469799	0.917217	0.953404
TCGA-BLCA	Presence of SNV mutations	AFF3	0.682073	449	0.0601336	2	126	0.047619	0.917217	0.953404
TCGA-BLCA	Presence of SNV mutations	AFF4	0.563636	449	0.0579065	0	166	0.0301205	0.913686	0.952011
TCGA-BLCA	Presence of SNV mutations	AFF4	0.482645	449	0.0579065	1	152	0.0789474	0.913686	0.952011
TCGA-BLCA	Presence of SNV mutations	AFF4	0.57686	449	0.0579065	2	131	0.0687023	0.913686	0.952011
TCGA-BLCA	Presence of SNV mutations	AKAP9	0.475709	449	0.124722	0	167	0.125749	0.976911	0.98943
TCGA-BLCA	Presence of SNV mutations	AKAP9	0.543907	449	0.124722	1	156	0.147436	0.976911	0.98943
TCGA-BLCA	Presence of SNV mutations	AKAP9	0.623894	449	0.124722	2	126	0.0952381	0.976911	0.98943
TCGA-BLCA	Presence of SNV mutations	ALK	0.647541	449	0.0289532	0	173	0.0289017	0.570307	0.725437
TCGA-BLCA	Presence of SNV mutations	ALK	0.704918	449	0.0289532	1	150	0.0266667	0.570307	0.725437
TCGA-BLCA	Presence of SNV mutations	ALK	0.719008	449	0.0289532	2	126	0.031746	0.570307	0.725437
TCGA-BLCA	Presence of SNV mutations	AMER1	0.760163	449	0.0489978	0	173	0.0924855	0.356836	0.528632
TCGA-BLCA	Presence of SNV mutations	AMER1	0.823848	449	0.0489978	1	150	0.02	0.356836	0.528632
TCGA-BLCA	Presence of SNV mutations	AMER1	0.745902	449	0.0489978	2	126	0.0238095	0.356836	0.528632
TCGA-BLCA	Presence of SNV mutations	APC	0.552521	449	0.0512249	0	174	0.0517241	0.302392	0.467744
TCGA-BLCA	Presence of SNV mutations	APC	0.710684	449	0.0512249	1	149	0.0469799	0.302392	0.467744
TCGA-BLCA	Presence of SNV mutations	APC	0.587167	449	0.0512249	2	126	0.0555556	0.302392	0.467744
TCGA-BLCA	Presence of SNV mutations	ARHGEF12	0.596721	449	0.0311804	0	173	0.0289017	0.898845	0.944416
TCGA-BLCA	Presence of SNV mutations	ARHGEF12	0.657851	449	0.0311804	1	150	0.0333333	0.898845	0.944416
TCGA-BLCA	Presence of SNV mutations	ARHGEF12	0.708678	449	0.0311804	2	126	0.031746	0.898845	0.944416
TCGA-BLCA	Presence of SNV mutations	ARID1A	0.567434	449	0.260579	0	173	0.260116	0.00870113	0.028037
TCGA-BLCA	Presence of SNV mutations	ARID1A	0.636636	449	0.260579	1	150	0.273333	0.00870113	0.028037
TCGA-BLCA	Presence of SNV mutations	ARID1A	0.580645	449	0.260579	2	126	0.246032	0.00870113	0.028037
TCGA-BLCA	Presence of SNV mutations	ARID1B	0.570975	449	0.0556793	0	172	0.0523256	0.088268	0.180705
TCGA-BLCA	Presence of SNV mutations	ARID1B	0.654661	449	0.0556793	1	150	0.0533333	0.088268	0.180705
TCGA-BLCA	Presence of SNV mutations	ARID1B	0.705508	449	0.0556793	2	127	0.0629921	0.088268	0.180705
TCGA-BLCA	Presence of SNV mutations	ARID2	0.605128	449	0.0801782	0	174	0.0632184	0.76522	0.867745
TCGA-BLCA	Presence of SNV mutations	ARID2	0.490028	449	0.0801782	1	149	0.107383	0.76522	0.867745
TCGA-BLCA	Presence of SNV mutations	ARID2	0.503831	449	0.0801782	2	126	0.0714286	0.76522	0.867745
TCGA-BLCA	Presence of SNV mutations	ASXL1	0.585084	449	0.0556793	0	173	0.0520231	0.788434	0.88381
TCGA-BLCA	Presence of SNV mutations	ASXL1	0.368644	449	0.0556793	1	150	0.06	0.788434	0.88381
TCGA-BLCA	Presence of SNV mutations	ASXL1	0.496368	449	0.0556793	2	126	0.0555556	0.788434	0.88381
TCGA-BLCA	Presence of SNV mutations	ATM	0.576453	449	0.13363	0	173	0.115607	0.0636749	0.139194
TCGA-BLCA	Presence of SNV mutations	ATM	0.505144	449	0.13363	1	151	0.152318	0.0636749	0.139194
TCGA-BLCA	Presence of SNV mutations	ATM	0.731481	449	0.13363	2	125	0.136	0.0636749	0.139194
TCGA-BLCA	Presence of SNV mutations	ATR	0.501709	449	0.0801782	0	174	0.0632184	0.431167	0.606925
TCGA-BLCA	Presence of SNV mutations	ATR	0.463438	449	0.0801782	1	149	0.107383	0.431167	0.606925
TCGA-BLCA	Presence of SNV mutations	ATR	0.645594	449	0.0801782	2	126	0.0714286	0.431167	0.606925
TCGA-BLCA	Presence of SNV mutations	ATRX	0.415966	449	0.0846325	0	179	0.122905	0.24323	0.397914
TCGA-BLCA	Presence of SNV mutations	ATRX	0.492585	449	0.0846325	1	144	0.0625	0.24323	0.397914
TCGA-BLCA	Presence of SNV mutations	ATRX	0.509685	449	0.0846325	2	126	0.0555556	0.24323	0.397914
TCGA-BLCA	Presence of SNV mutations	AXIN2	0.612948	449	0.0378619	0	173	0.0346821	0.368	0.54139
TCGA-BLCA	Presence of SNV mutations	AXIN2	0.579167	449	0.0378619	1	150	0.04	0.368	0.54139
TCGA-BLCA	Presence of SNV mutations	AXIN2	0.646667	449	0.0378619	2	126	0.0396825	0.368	0.54139
TCGA-BLCA	Presence of SNV mutations	BAP1	0.662295	449	0.0579065	0	169	0.0710059	0.270563	0.430402
TCGA-BLCA	Presence of SNV mutations	BAP1	0.631405	449	0.0579065	1	154	0.0649351	0.270563	0.430402
TCGA-BLCA	Presence of SNV mutations	BAP1	0.688017	449	0.0579065	2	126	0.031746	0.270563	0.430402
TCGA-BLCA	Presence of SNV mutations	BCL9	0.581967	449	0.0467706	0	173	0.0289017	0.874353	0.931119
TCGA-BLCA	Presence of SNV mutations	BCL9	0.583471	449	0.0467706	1	150	0.08	0.874353	0.931119
TCGA-BLCA	Presence of SNV mutations	BCL9	0.597107	449	0.0467706	2	126	0.031746	0.874353	0.931119
TCGA-BLCA	Presence of SNV mutations	BCOR	0.637295	449	0.0289532	0	172	0.0232558	0.594449	0.745559
TCGA-BLCA	Presence of SNV mutations	BCOR	0.651639	449	0.0289532	1	150	0.0333333	0.594449	0.745559
TCGA-BLCA	Presence of SNV mutations	BCOR	0.665984	449	0.0289532	2	127	0.0314961	0.594449	0.745559
TCGA-BLCA	Presence of SNV mutations	BLM	0.533058	449	0.0356347	0	172	0.0348837	0.775879	0.874599
TCGA-BLCA	Presence of SNV mutations	BLM	0.634711	449	0.0356347	1	151	0.0331126	0.775879	0.874599
TCGA-BLCA	Presence of SNV mutations	BLM	0.571667	449	0.0356347	2	126	0.0396825	0.775879	0.874599
TCGA-BLCA	Presence of SNV mutations	BRAF	0.590164	449	0.0289532	0	172	0.0290698	0.566723	0.722701
TCGA-BLCA	Presence of SNV mutations	BRAF	0.528689	449	0.0289532	1	150	0.0266667	0.566723	0.722701
TCGA-BLCA	Presence of SNV mutations	BRAF	0.639344	449	0.0289532	2	127	0.0314961	0.566723	0.722701
TCGA-BLCA	Presence of SNV mutations	BRCA1	0.747899	449	0.0579065	0	171	0.0409357	0.273231	0.432598
TCGA-BLCA	Presence of SNV mutations	BRCA1	0.505402	449	0.0579065	1	151	0.0794702	0.273231	0.432598
TCGA-BLCA	Presence of SNV mutations	BRCA1	0.65066	449	0.0579065	2	127	0.0551181	0.273231	0.432598
TCGA-BLCA	Presence of SNV mutations	BRCA2	0.53655	449	0.0935412	0	172	0.0755814	0.949022	0.972669
TCGA-BLCA	Presence of SNV mutations	BRCA2	0.605994	449	0.0935412	1	150	0.113333	0.949022	0.972669
TCGA-BLCA	Presence of SNV mutations	BRCA2	0.515351	449	0.0935412	2	127	0.0944882	0.949022	0.972669
TCGA-BLCA	Presence of SNV mutations	BRD4	0.620902	449	0.0423163	0	172	0.0232558	0.449169	0.622413
TCGA-BLCA	Presence of SNV mutations	BRD4	0.633197	449	0.0423163	1	150	0.0733333	0.449169	0.622413
TCGA-BLCA	Presence of SNV mutations	BRD4	0.625	449	0.0423163	2	127	0.0314961	0.449169	0.622413
TCGA-BLCA	Presence of SNV mutations	BRIP1	0.492857	449	0.0668151	0	174	0.0804598	0.754486	0.860592
TCGA-BLCA	Presence of SNV mutations	BRIP1	0.683333	449	0.0668151	1	149	0.0671141	0.754486	0.860592
TCGA-BLCA	Presence of SNV mutations	BRIP1	0.504202	449	0.0668151	2	126	0.047619	0.754486	0.860592
TCGA-BLCA	Presence of SNV mutations	CACNA1D	0.453252	449	0.0244989	0	173	0.0231214	0.437146	0.612034
TCGA-BLCA	Presence of SNV mutations	CACNA1D	0.663934	449	0.0244989	1	150	0.0266667	0.437146	0.612034
TCGA-BLCA	Presence of SNV mutations	CACNA1D	0.521858	449	0.0244989	2	126	0.0238095	0.437146	0.612034
TCGA-BLCA	Presence of SNV mutations	CAMTA1	0.688705	449	0.0534521	0	168	0.0416667	4.52454e-06	4.4268e-05
TCGA-BLCA	Presence of SNV mutations	CAMTA1	0.506944	449	0.0534521	1	155	0.0774194	4.52454e-06	4.4268e-05
TCGA-BLCA	Presence of SNV mutations	CAMTA1	0.72	449	0.0534521	2	126	0.0396825	4.52454e-06	4.4268e-05
TCGA-BLCA	Presence of SNV mutations	CARD11	0.506148	449	0.0423163	0	172	0.0232558	0.350816	0.522593
TCGA-BLCA	Presence of SNV mutations	CARD11	0.563525	449	0.0423163	1	150	0.0733333	0.350816	0.522593
TCGA-BLCA	Presence of SNV mutations	CARD11	0.67623	449	0.0423163	2	127	0.0314961	0.350816	0.522593
TCGA-BLCA	Presence of SNV mutations	CASP8	0.644628	449	0.0512249	0	172	0.0697674	0.799888	0.88874
TCGA-BLCA	Presence of SNV mutations	CASP8	0.66281	449	0.0512249	1	150	0.04	0.799888	0.88874
TCGA-BLCA	Presence of SNV mutations	CASP8	0.585124	449	0.0512249	2	127	0.0393701	0.799888	0.88874
TCGA-BLCA	Presence of SNV mutations	CDH1	0.691057	449	0.0267261	0	173	0.0289017	0.0512176	0.117306
TCGA-BLCA	Presence of SNV mutations	CDH1	0.883197	449	0.0267261	1	150	0.0266667	0.0512176	0.117306
TCGA-BLCA	Presence of SNV mutations	CDH1	0.863388	449	0.0267261	2	126	0.0238095	0.0512176	0.117306
TCGA-BLCA	Presence of SNV mutations	CDH11	0.654472	449	0.0334076	0	173	0.0231214	0.303031	0.468193
TCGA-BLCA	Presence of SNV mutations	CDH11	0.563525	449	0.0334076	1	150	0.0533333	0.303031	0.468193
TCGA-BLCA	Presence of SNV mutations	CDH11	0.795082	449	0.0334076	2	126	0.0238095	0.303031	0.468193
TCGA-BLCA	Presence of SNV mutations	CDK12	0.672316	449	0.0757238	0	174	0.0977011	0.0173361	0.0490743
TCGA-BLCA	Presence of SNV mutations	CDK12	0.643875	449	0.0757238	1	149	0.0604027	0.0173361	0.0490743
TCGA-BLCA	Presence of SNV mutations	CDK12	0.676282	449	0.0757238	2	126	0.0634921	0.0173361	0.0490743
TCGA-BLCA	Presence of SNV mutations	CDKN2A	0.46516	449	0.0868597	0	168	0.0595238	0.620162	0.768043
TCGA-BLCA	Presence of SNV mutations	CDKN2A	0.596398	449	0.0868597	1	155	0.135484	0.620162	0.768043
TCGA-BLCA	Presence of SNV mutations	CDKN2A	0.530983	449	0.0868597	2	126	0.0634921	0.620162	0.768043
TCGA-BLCA	Presence of SNV mutations	CEP89	0.764228	449	0.0244989	0	173	0.0231214	0.822458	0.902829
TCGA-BLCA	Presence of SNV mutations	CEP89	0.663957	449	0.0244989	1	151	0.0264901	0.822458	0.902829
TCGA-BLCA	Presence of SNV mutations	CEP89	0.546448	449	0.0244989	2	125	0.024	0.822458	0.902829
TCGA-BLCA	Presence of SNV mutations	CIC	0.786885	449	0.0601336	0	174	0.0689655	0.0684773	0.148006
TCGA-BLCA	Presence of SNV mutations	CIC	0.481557	449	0.0601336	1	149	0.0738255	0.0684773	0.148006
TCGA-BLCA	Presence of SNV mutations	CIC	0.698347	449	0.0601336	2	126	0.031746	0.0684773	0.148006
TCGA-BLCA	Presence of SNV mutations	CLIP1	0.464387	449	0.0824053	0	168	0.0535714	0.556355	0.714908
TCGA-BLCA	Presence of SNV mutations	CLIP1	0.521368	449	0.0824053	1	154	0.123377	0.556355	0.714908
TCGA-BLCA	Presence of SNV mutations	CLIP1	0.495726	449	0.0824053	2	127	0.0708661	0.556355	0.714908
TCGA-BLCA	Presence of SNV mutations	CLTC	0.629167	449	0.0690423	0	172	0.0697674	0.085873	0.176519
TCGA-BLCA	Presence of SNV mutations	CLTC	0.591667	449	0.0690423	1	150	0.0866667	0.085873	0.176519
TCGA-BLCA	Presence of SNV mutations	CLTC	0.598611	449	0.0690423	2	127	0.0472441	0.085873	0.176519
TCGA-BLCA	Presence of SNV mutations	CLTCL1	0.652439	449	0.0222717	0	173	0.0231214	0.258762	0.416561
TCGA-BLCA	Presence of SNV mutations	CLTCL1	0.739837	449	0.0222717	1	150	0.02	0.258762	0.416561
TCGA-BLCA	Presence of SNV mutations	CLTCL1	0.833333	449	0.0222717	2	126	0.0238095	0.258762	0.416561
TCGA-BLCA	Presence of SNV mutations	CNOT3	0.615854	449	0.0222717	0	173	0.0231214	1.91054e-06	2.0537e-05
TCGA-BLCA	Presence of SNV mutations	CNOT3	0.788618	449	0.0222717	1	150	0.02	1.91054e-06	2.0537e-05
TCGA-BLCA	Presence of SNV mutations	CNOT3	0.879781	449	0.0222717	2	126	0.0238095	1.91054e-06	2.0537e-05
TCGA-BLCA	Presence of SNV mutations	CNTRL	0.398072	449	0.0356347	0	173	0.0346821	0.221333	0.370705
TCGA-BLCA	Presence of SNV mutations	CNTRL	0.728926	449	0.0356347	1	150	0.0333333	0.221333	0.370705
TCGA-BLCA	Presence of SNV mutations	CNTRL	0.726667	449	0.0356347	2	126	0.0396825	0.221333	0.370705
TCGA-BLCA	Presence of SNV mutations	COL2A1	0.465574	449	0.0289532	0	172	0.0290698	0.116993	0.226621
TCGA-BLCA	Presence of SNV mutations	COL2A1	0.647541	449	0.0289532	1	151	0.0264901	0.116993	0.226621
TCGA-BLCA	Presence of SNV mutations	COL2A1	0.739669	449	0.0289532	2	126	0.031746	0.116993	0.226621
TCGA-BLCA	Presence of SNV mutations	CREBBP	0.615341	449	0.135857	0	172	0.104651	0.00107518	0.00478902
TCGA-BLCA	Presence of SNV mutations	CREBBP	0.688636	449	0.135857	1	150	0.18	0.00107518	0.00478902
TCGA-BLCA	Presence of SNV mutations	CREBBP	0.665909	449	0.135857	2	127	0.125984	0.00107518	0.00478902
TCGA-BLCA	Presence of SNV mutations	CRTC3	0.601626	449	0.0356347	0	173	0.0578035	0.627644	0.773001
TCGA-BLCA	Presence of SNV mutations	CRTC3	0.650407	449	0.0356347	1	150	0.02	0.627644	0.773001
TCGA-BLCA	Presence of SNV mutations	CRTC3	0.814208	449	0.0356347	2	126	0.0238095	0.627644	0.773001
TCGA-BLCA	Presence of SNV mutations	CSF1R	0.640244	449	0.0222717	0	173	0.0231214	0.188331	0.325949
TCGA-BLCA	Presence of SNV mutations	CSF1R	0.715447	449	0.0222717	1	150	0.02	0.188331	0.325949
TCGA-BLCA	Presence of SNV mutations	CSF1R	0.240437	449	0.0222717	2	126	0.0238095	0.188331	0.325949
TCGA-BLCA	Presence of SNV mutations	CTNNB1	0.85082	449	0.0423163	0	173	0.0346821	0.00410188	0.0150452
TCGA-BLCA	Presence of SNV mutations	CTNNB1	0.752066	449	0.0423163	1	150	0.06	0.00410188	0.0150452
TCGA-BLCA	Presence of SNV mutations	CTNNB1	0.789256	449	0.0423163	2	126	0.031746	0.00410188	0.0150452
TCGA-BLCA	Presence of SNV mutations	CUX1	0.495935	449	0.0267261	0	173	0.0289017	0.614764	0.763906
TCGA-BLCA	Presence of SNV mutations	CUX1	0.536885	449	0.0267261	1	150	0.0266667	0.614764	0.763906
TCGA-BLCA	Presence of SNV mutations	CUX1	0.453552	449	0.0267261	2	126	0.0238095	0.614764	0.763906
TCGA-BLCA	Presence of SNV mutations	DDX5	0.445122	449	0.0244989	0	174	0.0229885	0.802738	0.8897
TCGA-BLCA	Presence of SNV mutations	DDX5	0.553279	449	0.0244989	1	149	0.0268456	0.802738	0.8897
TCGA-BLCA	Presence of SNV mutations	DDX5	0.702186	449	0.0244989	2	126	0.0238095	0.802738	0.8897
TCGA-BLCA	Presence of SNV mutations	DICER1	0.703279	449	0.0489978	0	174	0.0747126	0.204002	0.346976
TCGA-BLCA	Presence of SNV mutations	DICER1	0.671074	449	0.0489978	1	149	0.033557	0.204002	0.346976
TCGA-BLCA	Presence of SNV mutations	DICER1	0.743802	449	0.0489978	2	126	0.031746	0.204002	0.346976
TCGA-BLCA	Presence of SNV mutations	DNM2	0.547541	449	0.0311804	0	173	0.0289017	0.506907	0.675708
TCGA-BLCA	Presence of SNV mutations	DNM2	0.641393	449	0.0311804	1	150	0.0333333	0.506907	0.675708
TCGA-BLCA	Presence of SNV mutations	DNM2	0.758264	449	0.0311804	2	126	0.031746	0.506907	0.675708
TCGA-BLCA	Presence of SNV mutations	DPYD	0.695082	449	0.0334076	0	173	0.0346821	0.139494	0.258292
TCGA-BLCA	Presence of SNV mutations	DPYD	0.735537	449	0.0334076	1	150	0.0333333	0.139494	0.258292
TCGA-BLCA	Presence of SNV mutations	DPYD	0.683884	449	0.0334076	2	126	0.031746	0.139494	0.258292
TCGA-BLCA	Presence of SNV mutations	EIF4A2	0.776639	449	0.0267261	0	172	0.0232558	0.399161	0.574855
TCGA-BLCA	Presence of SNV mutations	EIF4A2	0.72541	449	0.0267261	1	150	0.0266667	0.399161	0.574855
TCGA-BLCA	Presence of SNV mutations	EIF4A2	0.47541	449	0.0267261	2	127	0.0314961	0.399161	0.574855
TCGA-BLCA	Presence of SNV mutations	ELN	0.800813	449	0.0222717	0	173	0.0231214	0.744408	0.853202
TCGA-BLCA	Presence of SNV mutations	ELN	0.406504	449	0.0222717	1	150	0.02	0.744408	0.853202
TCGA-BLCA	Presence of SNV mutations	ELN	0.543716	449	0.0222717	2	126	0.0238095	0.744408	0.853202
TCGA-BLCA	Presence of SNV mutations	EP300	0.523392	449	0.144766	0	173	0.150289	0.630851	0.776003
TCGA-BLCA	Presence of SNV mutations	EP300	0.513527	449	0.144766	1	150	0.14	0.630851	0.776003
TCGA-BLCA	Presence of SNV mutations	EP300	0.595535	449	0.144766	2	126	0.142857	0.630851	0.776003
TCGA-BLCA	Presence of SNV mutations	EPHA3	0.449036	449	0.0378619	0	174	0.0344828	0.547497	0.707133
TCGA-BLCA	Presence of SNV mutations	EPHA3	0.6	449	0.0378619	1	149	0.0402685	0.547497	0.707133
TCGA-BLCA	Presence of SNV mutations	EPHA3	0.88	449	0.0378619	2	126	0.0396825	0.547497	0.707133
TCGA-BLCA	Presence of SNV mutations	EPS15	0.705285	449	0.0244989	0	172	0.0232558	0.795717	0.887843
TCGA-BLCA	Presence of SNV mutations	EPS15	0.610656	449	0.0244989	1	151	0.0264901	0.795717	0.887843
TCGA-BLCA	Presence of SNV mutations	EPS15	0.770492	449	0.0244989	2	126	0.0238095	0.795717	0.887843
TCGA-BLCA	Presence of SNV mutations	ERBB2	0.651337	449	0.131403	0	173	0.0982659	0.0379167	0.0928566
TCGA-BLCA	Presence of SNV mutations	ERBB2	0.547727	449	0.131403	1	150	0.166667	0.0379167	0.0928566
TCGA-BLCA	Presence of SNV mutations	ERBB2	0.662271	449	0.131403	2	126	0.134921	0.0379167	0.0928566
TCGA-BLCA	Presence of SNV mutations	ERBB3	0.566127	449	0.11804	0	173	0.0809249	0.535538	0.697161
TCGA-BLCA	Presence of SNV mutations	ERBB3	0.562865	449	0.11804	1	150	0.18	0.535538	0.697161
TCGA-BLCA	Presence of SNV mutations	ERBB3	0.614307	449	0.11804	2	126	0.0952381	0.535538	0.697161
TCGA-BLCA	Presence of SNV mutations	ERCC2	0.581884	449	0.091314	0	168	0.0714286	0.182248	0.317614
TCGA-BLCA	Presence of SNV mutations	ERCC2	0.513889	449	0.091314	1	155	0.116129	0.182248	0.317614
TCGA-BLCA	Presence of SNV mutations	ERCC2	0.590112	449	0.091314	2	126	0.0873016	0.182248	0.317614
TCGA-BLCA	Presence of SNV mutations	ETV1	0.623984	449	0.0244989	0	173	0.0231214	0.664219	0.802704
TCGA-BLCA	Presence of SNV mutations	ETV1	0.55123	449	0.0244989	1	150	0.0266667	0.664219	0.802704
TCGA-BLCA	Presence of SNV mutations	ETV1	0.759563	449	0.0244989	2	126	0.0238095	0.664219	0.802704
TCGA-BLCA	Presence of SNV mutations	ETV6	0.613821	449	0.0244989	0	174	0.0229885	0.302919	0.468193
TCGA-BLCA	Presence of SNV mutations	ETV6	0.769648	449	0.0244989	1	149	0.0268456	0.302919	0.468193
TCGA-BLCA	Presence of SNV mutations	ETV6	0.743169	449	0.0244989	2	126	0.0238095	0.302919	0.468193
TCGA-BLCA	Presence of SNV mutations	EZR	0.668033	449	0.0267261	0	172	0.0232558	0.0972153	0.195673
TCGA-BLCA	Presence of SNV mutations	EZR	0.75	449	0.0267261	1	150	0.0266667	0.0972153	0.195673
TCGA-BLCA	Presence of SNV mutations	EZR	0.811475	449	0.0267261	2	127	0.0314961	0.0972153	0.195673
TCGA-BLCA	Presence of SNV mutations	FANCA	0.385675	449	0.0579065	0	173	0.0635838	0.00721913	0.0240697
TCGA-BLCA	Presence of SNV mutations	FANCA	0.8375	449	0.0579065	1	146	0.0410959	0.00721913	0.0240697
TCGA-BLCA	Presence of SNV mutations	FANCA	0.648333	449	0.0579065	2	130	0.0692308	0.00721913	0.0240697
TCGA-BLCA	Presence of SNV mutations	FANCD2	0.534435	449	0.0489978	0	173	0.0346821	0.0379019	0.0928566
TCGA-BLCA	Presence of SNV mutations	FANCD2	0.504167	449	0.0489978	1	150	0.0733333	0.0379019	0.0928566
TCGA-BLCA	Presence of SNV mutations	FANCD2	0.636667	449	0.0489978	2	126	0.0396825	0.0379019	0.0928566
TCGA-BLCA	Presence of SNV mutations	FBXW7	0.483542	449	0.0890869	0	166	0.0722892	0.798705	0.88874
TCGA-BLCA	Presence of SNV mutations	FBXW7	0.510345	449	0.0890869	1	157	0.11465	0.798705	0.88874
TCGA-BLCA	Presence of SNV mutations	FBXW7	0.56087	449	0.0890869	2	126	0.0793651	0.798705	0.88874
TCGA-BLCA	Presence of SNV mutations	FCRL4	0.796748	449	0.0222717	0	173	0.0231214	0.180906	0.315685
TCGA-BLCA	Presence of SNV mutations	FCRL4	0.715447	449	0.0222717	1	150	0.02	0.180906	0.315685
TCGA-BLCA	Presence of SNV mutations	FCRL4	0.565574	449	0.0222717	2	126	0.0238095	0.180906	0.315685
TCGA-BLCA	Presence of SNV mutations	FGFR3	0.800682	449	0.146993	0	173	0.121387	7.53428e-12	2.30081e-10
TCGA-BLCA	Presence of SNV mutations	FGFR3	0.696016	449	0.146993	1	150	0.18	7.53428e-12	2.30081e-10
TCGA-BLCA	Presence of SNV mutations	FGFR3	0.787643	449	0.146993	2	126	0.142857	7.53428e-12	2.30081e-10
TCGA-BLCA	Presence of SNV mutations	FLT4	0.401639	449	0.0467706	0	173	0.0693642	0.886576	0.937056
TCGA-BLCA	Presence of SNV mutations	FLT4	0.553279	449	0.0467706	1	149	0.033557	0.886576	0.937056
TCGA-BLCA	Presence of SNV mutations	FLT4	0.733607	449	0.0467706	2	127	0.0314961	0.886576	0.937056
TCGA-BLCA	Presence of SNV mutations	FOXA1	0.629508	449	0.0489978	0	174	0.0747126	0.128381	0.243178
TCGA-BLCA	Presence of SNV mutations	FOXA1	0.709091	449	0.0489978	1	149	0.033557	0.128381	0.243178
TCGA-BLCA	Presence of SNV mutations	FOXA1	0.549587	449	0.0489978	2	126	0.031746	0.128381	0.243178
TCGA-BLCA	Presence of SNV mutations	GNAS	0.554878	449	0.0378619	0	173	0.0578035	0.40971	0.586277
TCGA-BLCA	Presence of SNV mutations	GNAS	0.528455	449	0.0378619	1	150	0.0266667	0.40971	0.586277
TCGA-BLCA	Presence of SNV mutations	GNAS	0.704918	449	0.0378619	2	126	0.0238095	0.40971	0.586277
TCGA-BLCA	Presence of SNV mutations	GRIN2A	0.528926	449	0.064588	0	168	0.0714286	0.588958	0.741671
TCGA-BLCA	Presence of SNV mutations	GRIN2A	0.750413	449	0.064588	1	155	0.0774194	0.588958	0.741671
TCGA-BLCA	Presence of SNV mutations	GRIN2A	0.64	449	0.064588	2	126	0.0396825	0.588958	0.741671
TCGA-BLCA	Presence of SNV mutations	HIP1	0.432927	449	0.0400891	0	173	0.0635838	0.807081	0.892305
TCGA-BLCA	Presence of SNV mutations	HIP1	0.489754	449	0.0400891	1	150	0.0266667	0.807081	0.892305
TCGA-BLCA	Presence of SNV mutations	HIP1	0.584699	449	0.0400891	2	126	0.0238095	0.807081	0.892305
TCGA-BLCA	Presence of SNV mutations	HLA-A	0.408537	449	0.0356347	0	174	0.0574713	0.924336	0.956856
TCGA-BLCA	Presence of SNV mutations	HLA-A	0.579946	449	0.0356347	1	149	0.0201342	0.924336	0.956856
TCGA-BLCA	Presence of SNV mutations	HLA-A	0.639344	449	0.0356347	2	126	0.0238095	0.924336	0.956856
TCGA-BLCA	Presence of SNV mutations	HRAS	0.720238	449	0.0579065	0	173	0.0809249	6.36822e-09	1.19397e-07
TCGA-BLCA	Presence of SNV mutations	HRAS	0.641667	449	0.0579065	1	150	0.04	6.36822e-09	1.19397e-07
TCGA-BLCA	Presence of SNV mutations	HRAS	0.670868	449	0.0579065	2	126	0.047619	6.36822e-09	1.19397e-07
TCGA-BLCA	Presence of SNV mutations	HSP90AA1	0.491667	449	0.0423163	0	172	0.0406977	0.849948	0.919523
TCGA-BLCA	Presence of SNV mutations	HSP90AA1	0.609722	449	0.0423163	1	151	0.0397351	0.849948	0.919523
TCGA-BLCA	Presence of SNV mutations	HSP90AA1	0.680672	449	0.0423163	2	126	0.047619	0.849948	0.919523
TCGA-BLCA	Presence of SNV mutations	HSP90AB1	0.573171	449	0.0400891	0	180	0.0611111	0.926465	0.957831
TCGA-BLCA	Presence of SNV mutations	HSP90AB1	0.79918	449	0.0400891	1	143	0.027972	0.926465	0.957831
TCGA-BLCA	Presence of SNV mutations	HSP90AB1	0.306011	449	0.0400891	2	126	0.0238095	0.926465	0.957831
TCGA-BLCA	Presence of SNV mutations	IKBKB	0.430894	449	0.0244989	0	173	0.0231214	0.6011	0.751795
TCGA-BLCA	Presence of SNV mutations	IKBKB	0.509485	449	0.0244989	1	150	0.0266667	0.6011	0.751795
TCGA-BLCA	Presence of SNV mutations	IKBKB	0.562842	449	0.0244989	2	126	0.0238095	0.6011	0.751795
TCGA-BLCA	Presence of SNV mutations	JAK3	0.567073	449	0.0244989	0	173	0.0231214	0.837704	0.912383
TCGA-BLCA	Presence of SNV mutations	JAK3	0.526639	449	0.0244989	1	150	0.0266667	0.837704	0.912383
TCGA-BLCA	Presence of SNV mutations	JAK3	0.781421	449	0.0244989	2	126	0.0238095	0.837704	0.912383
TCGA-BLCA	Presence of SNV mutations	KAT6A	0.646006	449	0.0378619	0	173	0.0346821	0.00525191	0.0183683
TCGA-BLCA	Presence of SNV mutations	KAT6A	0.5625	449	0.0378619	1	150	0.04	0.00525191	0.0183683
TCGA-BLCA	Presence of SNV mutations	KAT6A	0.536667	449	0.0378619	2	126	0.0396825	0.00525191	0.0183683
TCGA-BLCA	Presence of SNV mutations	KAT6B	0.528455	449	0.0289532	0	174	0.0402299	0.883224	0.935019
TCGA-BLCA	Presence of SNV mutations	KAT6B	0.734417	449	0.0289532	1	149	0.0201342	0.883224	0.935019
TCGA-BLCA	Presence of SNV mutations	KAT6B	0.622951	449	0.0289532	2	126	0.0238095	0.883224	0.935019
TCGA-BLCA	Presence of SNV mutations	KDM5A	0.641667	449	0.0400891	0	172	0.0348837	0.86105	0.925078
TCGA-BLCA	Presence of SNV mutations	KDM5A	0.483333	449	0.0400891	1	150	0.04	0.86105	0.925078
TCGA-BLCA	Presence of SNV mutations	KDM5A	0.670833	449	0.0400891	2	127	0.0472441	0.86105	0.925078
TCGA-BLCA	Presence of SNV mutations	KDM6A	0.581366	449	0.300668	0	173	0.271676	0.0672076	0.145731
TCGA-BLCA	Presence of SNV mutations	KDM6A	0.527473	449	0.300668	1	151	0.357616	0.0672076	0.145731
TCGA-BLCA	Presence of SNV mutations	KDM6A	0.56044	449	0.300668	2	125	0.272	0.0672076	0.145731
TCGA-BLCA	Presence of SNV mutations	KDR	0.720386	449	0.0378619	0	173	0.0346821	0.612825	0.762908
TCGA-BLCA	Presence of SNV mutations	KDR	0.570833	449	0.0378619	1	150	0.04	0.612825	0.762908
TCGA-BLCA	Presence of SNV mutations	KDR	0.72	449	0.0378619	2	126	0.0396825	0.612825	0.762908
TCGA-BLCA	Presence of SNV mutations	KIAA1549	0.735772	449	0.0378619	0	173	0.0231214	0.679719	0.810636
TCGA-BLCA	Presence of SNV mutations	KIAA1549	0.650407	449	0.0378619	1	150	0.0666667	0.679719	0.810636
TCGA-BLCA	Presence of SNV mutations	KIAA1549	0.710383	449	0.0378619	2	126	0.0238095	0.679719	0.810636
TCGA-BLCA	Presence of SNV mutations	KMT2A	0.717905	449	0.10245	0	174	0.091954	0.00424684	0.0154783
TCGA-BLCA	Presence of SNV mutations	KMT2A	0.562162	449	0.10245	1	149	0.100671	0.00424684	0.0154783
TCGA-BLCA	Presence of SNV mutations	KMT2A	0.681212	449	0.10245	2	126	0.119048	0.00424684	0.0154783
TCGA-BLCA	Presence of SNV mutations	KMT2C	0.551683	449	0.213808	0	166	0.168675	0.65928	0.799025
TCGA-BLCA	Presence of SNV mutations	KMT2C	0.470495	449	0.213808	1	156	0.275641	0.65928	0.799025
TCGA-BLCA	Presence of SNV mutations	KMT2C	0.543366	449	0.213808	2	127	0.19685	0.65928	0.799025
TCGA-BLCA	Presence of SNV mutations	KMT2D	0.549379	449	0.298441	0	173	0.294798	0.0333408	0.0838259
TCGA-BLCA	Presence of SNV mutations	KMT2D	0.556818	449	0.298441	1	150	0.306667	0.0333408	0.0838259
TCGA-BLCA	Presence of SNV mutations	KMT2D	0.615786	449	0.298441	2	126	0.293651	0.0333408	0.0838259
TCGA-BLCA	Presence of SNV mutations	KRAS	0.829201	449	0.0467706	0	172	0.0348837	0.842085	0.915191
TCGA-BLCA	Presence of SNV mutations	KRAS	0.413223	449	0.0467706	1	152	0.0657895	0.842085	0.915191
TCGA-BLCA	Presence of SNV mutations	KRAS	0.578333	449	0.0467706	2	125	0.04	0.842085	0.915191
TCGA-BLCA	Presence of SNV mutations	KTN1	0.79065	449	0.0222717	0	173	0.0231214	0.00886914	0.02851
TCGA-BLCA	Presence of SNV mutations	KTN1	0.834688	449	0.0222717	1	150	0.02	0.00886914	0.02851
TCGA-BLCA	Presence of SNV mutations	KTN1	0.737705	449	0.0222717	2	126	0.0238095	0.00886914	0.02851
TCGA-BLCA	Presence of SNV mutations	LIFR	0.786585	449	0.0222717	0	173	0.0231214	0.288975	0.453253
TCGA-BLCA	Presence of SNV mutations	LIFR	0.785908	449	0.0222717	1	150	0.02	0.288975	0.453253
TCGA-BLCA	Presence of SNV mutations	LIFR	0.666667	449	0.0222717	2	126	0.0238095	0.288975	0.453253
TCGA-BLCA	Presence of SNV mutations	LPP	0.642276	449	0.0222717	0	173	0.0231214	0.747167	0.855051
TCGA-BLCA	Presence of SNV mutations	LPP	0.536585	449	0.0222717	1	150	0.02	0.747167	0.855051
TCGA-BLCA	Presence of SNV mutations	LPP	0.721311	449	0.0222717	2	126	0.0238095	0.747167	0.855051
TCGA-BLCA	Presence of SNV mutations	MAP3K1	0.705285	449	0.0400891	0	173	0.0693642	0.653524	0.794437
TCGA-BLCA	Presence of SNV mutations	MAP3K1	0.582656	449	0.0400891	1	150	0.02	0.653524	0.794437
TCGA-BLCA	Presence of SNV mutations	MAP3K1	0.393443	449	0.0400891	2	126	0.0238095	0.653524	0.794437
TCGA-BLCA	Presence of SNV mutations	MECOM	0.523611	449	0.0400891	0	173	0.0346821	0.642942	0.785362
TCGA-BLCA	Presence of SNV mutations	MECOM	0.469444	449	0.0400891	1	149	0.0402685	0.642942	0.785362
TCGA-BLCA	Presence of SNV mutations	MECOM	0.619444	449	0.0400891	2	127	0.0472441	0.642942	0.785362
TCGA-BLCA	Presence of SNV mutations	MED12	0.648305	449	0.0712695	0	173	0.0462428	0.336704	0.506817
TCGA-BLCA	Presence of SNV mutations	MED12	0.588983	449	0.0712695	1	149	0.107383	0.336704	0.506817
TCGA-BLCA	Presence of SNV mutations	MED12	0.708686	449	0.0712695	2	127	0.0629921	0.336704	0.506817
TCGA-BLCA	Presence of SNV mutations	MET	0.674931	449	0.0489978	0	173	0.0404624	0.691056	0.817145
TCGA-BLCA	Presence of SNV mutations	MET	0.561111	449	0.0489978	1	150	0.0666667	0.691056	0.817145
TCGA-BLCA	Presence of SNV mutations	MET	0.733333	449	0.0489978	2	126	0.0396825	0.691056	0.817145
TCGA-BLCA	Presence of SNV mutations	MSH2	0.577869	449	0.0378619	0	172	0.0290698	0.838959	0.912884
TCGA-BLCA	Presence of SNV mutations	MSH2	0.670082	449	0.0378619	1	150	0.0533333	0.838959	0.912884
TCGA-BLCA	Presence of SNV mutations	MSH2	0.655738	449	0.0378619	2	127	0.0314961	0.838959	0.912884
TCGA-BLCA	Presence of SNV mutations	MSH6	0.760163	449	0.0267261	0	173	0.0289017	0.544834	0.704563
TCGA-BLCA	Presence of SNV mutations	MSH6	0.547425	449	0.0267261	1	150	0.0266667	0.544834	0.704563
TCGA-BLCA	Presence of SNV mutations	MSH6	0.770492	449	0.0267261	2	126	0.0238095	0.544834	0.704563
TCGA-BLCA	Presence of SNV mutations	MTOR	0.831148	449	0.0289532	0	173	0.0289017	0.0331864	0.0836091
TCGA-BLCA	Presence of SNV mutations	MTOR	0.713115	449	0.0289532	1	150	0.0266667	0.0331864	0.0836091
TCGA-BLCA	Presence of SNV mutations	MTOR	0.752066	449	0.0289532	2	126	0.031746	0.0331864	0.0836091
TCGA-BLCA	Presence of SNV mutations	MYH11	0.581032	449	0.0489978	0	173	0.0404624	0.62661	0.772577
TCGA-BLCA	Presence of SNV mutations	MYH11	0.501801	449	0.0489978	1	149	0.0536913	0.62661	0.772577
TCGA-BLCA	Presence of SNV mutations	MYH11	0.661465	449	0.0489978	2	127	0.0551181	0.62661	0.772577
TCGA-BLCA	Presence of SNV mutations	MYH9	0.627119	449	0.0734967	0	172	0.0523256	0.159223	0.286019
TCGA-BLCA	Presence of SNV mutations	MYH9	0.591643	449	0.0734967	1	151	0.10596	0.159223	0.286019
TCGA-BLCA	Presence of SNV mutations	MYH9	0.527778	449	0.0734967	2	126	0.0634921	0.159223	0.286019
TCGA-BLCA	Presence of SNV mutations	MYO5A	0.67623	449	0.0267261	0	172	0.0232558	0.262345	0.419481
TCGA-BLCA	Presence of SNV mutations	MYO5A	0.672131	449	0.0267261	1	150	0.0266667	0.262345	0.419481
TCGA-BLCA	Presence of SNV mutations	MYO5A	0.604508	449	0.0267261	2	127	0.0314961	0.262345	0.419481
TCGA-BLCA	Presence of SNV mutations	NBN	0.573171	449	0.0356347	0	173	0.0578035	0.153458	0.277767
TCGA-BLCA	Presence of SNV mutations	NBN	0.807588	449	0.0356347	1	150	0.02	0.153458	0.277767
TCGA-BLCA	Presence of SNV mutations	NBN	0.885246	449	0.0356347	2	126	0.0238095	0.153458	0.277767
TCGA-BLCA	Presence of SNV mutations	NCOA1	0.439376	449	0.064588	0	172	0.0813953	0.587363	0.740356
TCGA-BLCA	Presence of SNV mutations	NCOA1	0.639856	449	0.064588	1	150	0.0466667	0.587363	0.740356
TCGA-BLCA	Presence of SNV mutations	NCOA1	0.605042	449	0.064588	2	127	0.0629921	0.587363	0.740356
TCGA-BLCA	Presence of SNV mutations	NCOA2	0.745935	449	0.0512249	0	169	0.0236686	0.925063	0.956872
TCGA-BLCA	Presence of SNV mutations	NCOA2	0.831967	449	0.0512249	1	154	0.103896	0.925063	0.956872
TCGA-BLCA	Presence of SNV mutations	NCOA2	0.36612	449	0.0512249	2	126	0.0238095	0.925063	0.956872
TCGA-BLCA	Presence of SNV mutations	NCOR1	0.555072	449	0.0868597	0	174	0.0689655	0.978901	0.990201
TCGA-BLCA	Presence of SNV mutations	NCOR1	0.512427	449	0.0868597	1	149	0.107383	0.978901	0.990201
TCGA-BLCA	Presence of SNV mutations	NCOR1	0.522329	449	0.0868597	2	126	0.0873016	0.978901	0.990201
TCGA-BLCA	Presence of SNV mutations	NF1	0.538462	449	0.077951	0	179	0.0949721	0.0116941	0.0357545
TCGA-BLCA	Presence of SNV mutations	NF1	0.768281	449	0.077951	1	144	0.0625	0.0116941	0.0357545
TCGA-BLCA	Presence of SNV mutations	NF1	0.646552	449	0.077951	2	126	0.0714286	0.0116941	0.0357545
TCGA-BLCA	Presence of SNV mutations	NFATC2	0.827236	449	0.0400891	0	173	0.0231214	0.00109431	0.00485278
TCGA-BLCA	Presence of SNV mutations	NFATC2	0.651639	449	0.0400891	1	150	0.0733333	0.00109431	0.00485278
TCGA-BLCA	Presence of SNV mutations	NFATC2	0.65847	449	0.0400891	2	126	0.0238095	0.00109431	0.00485278
TCGA-BLCA	Presence of SNV mutations	NFE2L2	0.712924	449	0.0668151	0	172	0.0755814	0.016849	0.047965
TCGA-BLCA	Presence of SNV mutations	NFE2L2	0.557203	449	0.0668151	1	150	0.0533333	0.016849	0.047965
TCGA-BLCA	Presence of SNV mutations	NFE2L2	0.712924	449	0.0668151	2	127	0.0708661	0.016849	0.047965
TCGA-BLCA	Presence of SNV mutations	NIN	0.716253	449	0.0378619	0	173	0.0346821	0.633859	0.778989
TCGA-BLCA	Presence of SNV mutations	NIN	0.697222	449	0.0378619	1	150	0.04	0.633859	0.778989
TCGA-BLCA	Presence of SNV mutations	NIN	0.531667	449	0.0378619	2	126	0.0396825	0.633859	0.778989
TCGA-BLCA	Presence of SNV mutations	NOTCH1	0.471545	449	0.0423163	0	180	0.0666667	0.991882	0.994778
TCGA-BLCA	Presence of SNV mutations	NOTCH1	0.702869	449	0.0423163	1	143	0.027972	0.991882	0.994778
TCGA-BLCA	Presence of SNV mutations	NOTCH1	0.677596	449	0.0423163	2	126	0.0238095	0.991882	0.994778
TCGA-BLCA	Presence of SNV mutations	NOTCH2	0.422951	449	0.0601336	0	168	0.0714286	0.574592	0.728358
TCGA-BLCA	Presence of SNV mutations	NOTCH2	0.671074	449	0.0601336	1	155	0.0709677	0.574592	0.728358
TCGA-BLCA	Presence of SNV mutations	NOTCH2	0.466942	449	0.0601336	2	126	0.031746	0.574592	0.728358
TCGA-BLCA	Presence of SNV mutations	NOTCH3	0.542623	449	0.0334076	0	174	0.0344828	0.312175	0.478652
TCGA-BLCA	Presence of SNV mutations	NOTCH3	0.702479	449	0.0334076	1	149	0.033557	0.312175	0.478652
TCGA-BLCA	Presence of SNV mutations	NOTCH3	0.659091	449	0.0334076	2	126	0.031746	0.312175	0.478652
TCGA-BLCA	Presence of SNV mutations	NRG1	0.716393	449	0.0311804	0	173	0.0289017	0.182623	0.317856
TCGA-BLCA	Presence of SNV mutations	NRG1	0.694672	449	0.0311804	1	150	0.0333333	0.182623	0.317856
TCGA-BLCA	Presence of SNV mutations	NRG1	0.623967	449	0.0311804	2	126	0.031746	0.182623	0.317856
TCGA-BLCA	Presence of SNV mutations	NSD1	0.555952	449	0.0467706	0	173	0.0462428	1.41119e-05	0.000118511
TCGA-BLCA	Presence of SNV mutations	NSD1	0.884754	449	0.0467706	1	150	0.0466667	1.41119e-05	0.000118511
TCGA-BLCA	Presence of SNV mutations	NSD1	0.718487	449	0.0467706	2	126	0.047619	1.41119e-05	0.000118511
TCGA-BLCA	Presence of SNV mutations	NUMA1	0.750413	449	0.0467706	0	167	0.0299401	0.112831	0.220573
TCGA-BLCA	Presence of SNV mutations	NUMA1	0.561983	449	0.0467706	1	155	0.0709677	0.112831	0.220573
TCGA-BLCA	Presence of SNV mutations	NUMA1	0.839669	449	0.0467706	2	127	0.0393701	0.112831	0.220573
TCGA-BLCA	Presence of SNV mutations	NUP214	0.538567	449	0.0423163	0	173	0.0346821	0.757374	0.861647
TCGA-BLCA	Presence of SNV mutations	NUP214	0.640278	449	0.0423163	1	150	0.0533333	0.757374	0.861647
TCGA-BLCA	Presence of SNV mutations	NUP214	0.696667	449	0.0423163	2	126	0.0396825	0.757374	0.861647
TCGA-BLCA	Presence of SNV mutations	NUP98	0.776639	449	0.0334076	0	173	0.0404624	0.795498	0.887843
TCGA-BLCA	Presence of SNV mutations	NUP98	0.657787	449	0.0334076	1	149	0.0268456	0.795498	0.887843
TCGA-BLCA	Presence of SNV mutations	NUP98	0.633197	449	0.0334076	2	127	0.0314961	0.795498	0.887843
TCGA-BLCA	Presence of SNV mutations	NUTM1	0.614754	449	0.0267261	0	173	0.0231214	0.210739	0.355882
TCGA-BLCA	Presence of SNV mutations	NUTM1	0.553279	449	0.0267261	1	149	0.0268456	0.210739	0.355882
TCGA-BLCA	Presence of SNV mutations	NUTM1	0.715164	449	0.0267261	2	127	0.0314961	0.210739	0.355882
TCGA-BLCA	Presence of SNV mutations	PALB2	0.918033	449	0.0267261	0	172	0.0232558	1.19115e-05	0.000101727
TCGA-BLCA	Presence of SNV mutations	PALB2	0.854508	449	0.0267261	1	150	0.0266667	1.19115e-05	0.000101727
TCGA-BLCA	Presence of SNV mutations	PALB2	0.784836	449	0.0267261	2	127	0.0314961	1.19115e-05	0.000101727
TCGA-BLCA	Presence of SNV mutations	PBRM1	0.708283	449	0.0623608	0	172	0.0406977	0.159555	0.286406
TCGA-BLCA	Presence of SNV mutations	PBRM1	0.708283	449	0.0623608	1	150	0.0933333	0.159555	0.286406
TCGA-BLCA	Presence of SNV mutations	PBRM1	0.761104	449	0.0623608	2	127	0.0551181	0.159555	0.286406
TCGA-BLCA	Presence of SNV mutations	PDE4DIP	0.509871	449	0.0957684	0	173	0.0809249	0.803867	0.890124
TCGA-BLCA	Presence of SNV mutations	PDE4DIP	0.575221	449	0.0957684	1	149	0.107383	0.803867	0.890124
TCGA-BLCA	Presence of SNV mutations	PDE4DIP	0.590878	449	0.0957684	2	127	0.102362	0.803867	0.890124
TCGA-BLCA	Presence of SNV mutations	PDGFRA	0.735537	449	0.0356347	0	172	0.0348837	0.737579	0.850209
TCGA-BLCA	Presence of SNV mutations	PDGFRA	0.689256	449	0.0356347	1	151	0.0331126	0.737579	0.850209
TCGA-BLCA	Presence of SNV mutations	PDGFRA	0.635	449	0.0356347	2	126	0.0396825	0.737579	0.850209
TCGA-BLCA	Presence of SNV mutations	PIK3CA	0.527697	449	0.231626	0	172	0.203488	0.0213413	0.0582443
TCGA-BLCA	Presence of SNV mutations	PIK3CA	0.628644	449	0.231626	1	151	0.271523	0.0213413	0.0582443
TCGA-BLCA	Presence of SNV mutations	PIK3CA	0.607872	449	0.231626	2	126	0.222222	0.0213413	0.0582443
TCGA-BLCA	Presence of SNV mutations	PLCG1	0.727459	449	0.0289532	0	172	0.0290698	1.79209e-06	1.94192e-05
TCGA-BLCA	Presence of SNV mutations	PLCG1	0.868852	449	0.0289532	1	150	0.0266667	1.79209e-06	1.94192e-05
TCGA-BLCA	Presence of SNV mutations	PLCG1	0.778689	449	0.0289532	2	127	0.0314961	1.79209e-06	1.94192e-05
TCGA-BLCA	Presence of SNV mutations	POLE	0.507353	449	0.0534521	0	174	0.0517241	0.894875	0.942436
TCGA-BLCA	Presence of SNV mutations	POLE	0.631356	449	0.0534521	1	149	0.0536913	0.894875	0.942436
TCGA-BLCA	Presence of SNV mutations	POLE	0.539952	449	0.0534521	2	126	0.0555556	0.894875	0.942436
TCGA-BLCA	Presence of SNV mutations	POT1	0.503279	449	0.0334076	0	173	0.0289017	0.543583	0.703881
TCGA-BLCA	Presence of SNV mutations	POT1	0.557025	449	0.0334076	1	150	0.04	0.543583	0.703881
TCGA-BLCA	Presence of SNV mutations	POT1	0.714876	449	0.0334076	2	126	0.031746	0.543583	0.703881
TCGA-BLCA	Presence of SNV mutations	PPARG	0.614754	449	0.0467706	0	174	0.0344828	0.664506	0.802704
TCGA-BLCA	Presence of SNV mutations	PPARG	0.598361	449	0.0467706	1	149	0.0738255	0.664506	0.802704
TCGA-BLCA	Presence of SNV mutations	PPARG	0.820248	449	0.0467706	2	126	0.031746	0.664506	0.802704
TCGA-BLCA	Presence of SNV mutations	PRDM16	0.452893	449	0.0356347	0	172	0.0348837	0.819162	0.900475
TCGA-BLCA	Presence of SNV mutations	PRDM16	0.646281	449	0.0356347	1	150	0.0333333	0.819162	0.900475
TCGA-BLCA	Presence of SNV mutations	PRDM16	0.702479	449	0.0356347	2	127	0.0393701	0.819162	0.900475
TCGA-BLCA	Presence of SNV mutations	PSIP1	0.565278	449	0.0423163	0	172	0.0348837	0.735854	0.848706
TCGA-BLCA	Presence of SNV mutations	PSIP1	0.725	449	0.0423163	1	150	0.0466667	0.735854	0.848706
TCGA-BLCA	Presence of SNV mutations	PSIP1	0.627778	449	0.0423163	2	127	0.0472441	0.735854	0.848706
TCGA-BLCA	Presence of SNV mutations	PTCH1	0.513774	449	0.0579065	0	174	0.0517241	0.592815	0.744302
TCGA-BLCA	Presence of SNV mutations	PTCH1	0.704132	449	0.0579065	1	145	0.0551724	0.592815	0.744302
TCGA-BLCA	Presence of SNV mutations	PTCH1	0.393333	449	0.0579065	2	130	0.0692308	0.592815	0.744302
TCGA-BLCA	Presence of SNV mutations	PTEN	0.743802	449	0.0489978	0	171	0.0409357	0.00231447	0.00928319
TCGA-BLCA	Presence of SNV mutations	PTEN	0.616529	449	0.0489978	1	147	0.0408163	0.00231447	0.00928319
TCGA-BLCA	Presence of SNV mutations	PTEN	0.695868	449	0.0489978	2	131	0.0687023	0.00231447	0.00928319
TCGA-BLCA	Presence of SNV mutations	PTPRB	0.590164	449	0.0400891	0	173	0.0578035	0.158074	0.284589
TCGA-BLCA	Presence of SNV mutations	PTPRB	0.668033	449	0.0400891	1	150	0.0266667	0.158074	0.284589
TCGA-BLCA	Presence of SNV mutations	PTPRB	0.818182	449	0.0400891	2	126	0.031746	0.158074	0.284589
TCGA-BLCA	Presence of SNV mutations	PTPRC	0.603306	449	0.0556793	0	174	0.0804598	0.991991	0.994778
TCGA-BLCA	Presence of SNV mutations	PTPRC	0.440278	449	0.0556793	1	149	0.0402685	0.991991	0.994778
TCGA-BLCA	Presence of SNV mutations	PTPRC	0.6	449	0.0556793	2	126	0.0396825	0.991991	0.994778
TCGA-BLCA	Presence of SNV mutations	PTPRK	0.38843	449	0.0556793	0	171	0.0584795	0.871149	0.928952
TCGA-BLCA	Presence of SNV mutations	PTPRK	0.504132	449	0.0556793	1	151	0.0662252	0.871149	0.928952
TCGA-BLCA	Presence of SNV mutations	PTPRK	0.766942	449	0.0556793	2	127	0.0393701	0.871149	0.928952
TCGA-BLCA	Presence of SNV mutations	RAD21	0.550964	449	0.0356347	0	173	0.0346821	0.418506	0.594013
TCGA-BLCA	Presence of SNV mutations	RAD21	0.723967	449	0.0356347	1	150	0.0333333	0.418506	0.594013
TCGA-BLCA	Presence of SNV mutations	RAD21	0.801667	449	0.0356347	2	126	0.0396825	0.418506	0.594013
TCGA-BLCA	Presence of SNV mutations	RANBP2	0.562203	449	0.0601336	0	172	0.0523256	0.20474	0.34779
TCGA-BLCA	Presence of SNV mutations	RANBP2	0.535613	449	0.0601336	1	150	0.06	0.20474	0.34779
TCGA-BLCA	Presence of SNV mutations	RANBP2	0.701804	449	0.0601336	2	127	0.0708661	0.20474	0.34779
TCGA-BLCA	Presence of SNV mutations	RB1	0.616471	449	0.164811	0	173	0.150289	0.00112249	0.0049559
TCGA-BLCA	Presence of SNV mutations	RB1	0.659722	449	0.164811	1	150	0.16	0.00112249	0.0049559
TCGA-BLCA	Presence of SNV mutations	RB1	0.610561	449	0.164811	2	126	0.190476	0.00112249	0.0049559
TCGA-BLCA	Presence of SNV mutations	RBM15	0.778689	449	0.0267261	0	173	0.0231214	0.0213913	0.0583018
TCGA-BLCA	Presence of SNV mutations	RBM15	0.487705	449	0.0267261	1	149	0.0268456	0.0213913	0.0583018
TCGA-BLCA	Presence of SNV mutations	RBM15	0.444672	449	0.0267261	2	127	0.0314961	0.0213913	0.0583018
TCGA-BLCA	Presence of SNV mutations	RHOA	0.69146	449	0.0423163	0	174	0.045977	0.682875	0.811549
TCGA-BLCA	Presence of SNV mutations	RHOA	0.579167	449	0.0423163	1	149	0.0402685	0.682875	0.811549
TCGA-BLCA	Presence of SNV mutations	RHOA	0.64	449	0.0423163	2	126	0.0396825	0.682875	0.811549
TCGA-BLCA	Presence of SNV mutations	RNF213	0.695906	449	0.104677	0	172	0.0697674	0.199493	0.340744
TCGA-BLCA	Presence of SNV mutations	RNF213	0.535819	449	0.104677	1	150	0.153333	0.199493	0.340744
TCGA-BLCA	Presence of SNV mutations	RNF213	0.590643	449	0.104677	2	127	0.0944882	0.199493	0.340744
TCGA-BLCA	Presence of SNV mutations	ROS1	0.428571	449	0.0623608	0	173	0.0809249	0.0132044	0.039195
TCGA-BLCA	Presence of SNV mutations	ROS1	0.755102	449	0.0623608	1	149	0.0469799	0.0132044	0.039195
TCGA-BLCA	Presence of SNV mutations	ROS1	0.785114	449	0.0623608	2	127	0.0551181	0.0132044	0.039195
TCGA-BLCA	Presence of SNV mutations	RUNX1	0.538934	449	0.0267261	0	172	0.0232558	0.739934	0.851949
TCGA-BLCA	Presence of SNV mutations	RUNX1	0.69877	449	0.0267261	1	150	0.0266667	0.739934	0.851949
TCGA-BLCA	Presence of SNV mutations	RUNX1	0.55123	449	0.0267261	2	127	0.0314961	0.739934	0.851949
TCGA-BLCA	Presence of SNV mutations	SETBP1	0.661885	449	0.0267261	0	172	0.0232558	1.11429e-21	1.12293e-19
TCGA-BLCA	Presence of SNV mutations	SETBP1	0.711066	449	0.0267261	1	150	0.0266667	1.11429e-21	1.12293e-19
TCGA-BLCA	Presence of SNV mutations	SETBP1	0.961066	449	0.0267261	2	127	0.0314961	1.11429e-21	1.12293e-19
TCGA-BLCA	Presence of SNV mutations	SETD2	0.704653	449	0.0601336	0	172	0.0523256	0.0870677	0.178611
TCGA-BLCA	Presence of SNV mutations	SETD2	0.74169	449	0.0601336	1	150	0.06	0.0870677	0.178611
TCGA-BLCA	Presence of SNV mutations	SETD2	0.666667	449	0.0601336	2	127	0.0708661	0.0870677	0.178611
TCGA-BLCA	Presence of SNV mutations	SF3B1	0.62395	449	0.0801782	0	173	0.0924855	0.395404	0.571076
TCGA-BLCA	Presence of SNV mutations	SF3B1	0.656663	449	0.0801782	1	146	0.0616438	0.395404	0.571076
TCGA-BLCA	Presence of SNV mutations	SF3B1	0.627119	449	0.0801782	2	130	0.0846154	0.395404	0.571076
TCGA-BLCA	Presence of SNV mutations	SMARCA4	0.567827	449	0.0846325	0	178	0.117978	0.408812	0.58554
TCGA-BLCA	Presence of SNV mutations	SMARCA4	0.561825	449	0.0846325	1	144	0.0694444	0.408812	0.58554
TCGA-BLCA	Presence of SNV mutations	SMARCA4	0.436975	449	0.0846325	2	127	0.0551181	0.408812	0.58554
TCGA-BLCA	Presence of SNV mutations	SPECC1	0.648374	449	0.0356347	0	174	0.0574713	0.00207546	0.00851062
TCGA-BLCA	Presence of SNV mutations	SPECC1	0.642276	449	0.0356347	1	149	0.0201342	0.00207546	0.00851062
TCGA-BLCA	Presence of SNV mutations	SPECC1	0.60929	449	0.0356347	2	126	0.0238095	0.00207546	0.00851062
TCGA-BLCA	Presence of SNV mutations	SPEN	0.556034	449	0.115813	0	173	0.144509	0.100525	0.201299
TCGA-BLCA	Presence of SNV mutations	SPEN	0.742241	449	0.115813	1	149	0.114094	0.100525	0.201299
TCGA-BLCA	Presence of SNV mutations	SPEN	0.500862	449	0.115813	2	127	0.0787402	0.100525	0.201299
TCGA-BLCA	Presence of SNV mutations	STAG2	0.646091	449	0.124722	0	172	0.110465	0.143829	0.264116
TCGA-BLCA	Presence of SNV mutations	STAG2	0.531893	449	0.124722	1	150	0.126667	0.143829	0.264116
TCGA-BLCA	Presence of SNV mutations	STAG2	0.598765	449	0.124722	2	127	0.141732	0.143829	0.264116
TCGA-BLCA	Presence of SNV mutations	STIL	0.460055	449	0.0467706	0	173	0.0635838	0.844253	0.917053
TCGA-BLCA	Presence of SNV mutations	STIL	0.61157	449	0.0467706	1	150	0.0333333	0.844253	0.917053
TCGA-BLCA	Presence of SNV mutations	STIL	0.591667	449	0.0467706	2	126	0.0396825	0.844253	0.917053
TCGA-BLCA	Presence of SNV mutations	TET1	0.50105	449	0.064588	0	179	0.0837989	0.828001	0.906729
TCGA-BLCA	Presence of SNV mutations	TET1	0.618247	449	0.064588	1	144	0.0486111	0.828001	0.906729
TCGA-BLCA	Presence of SNV mutations	TET1	0.687651	449	0.064588	2	126	0.0555556	0.828001	0.906729
TCGA-BLCA	Presence of SNV mutations	THRAP3	0.702479	449	0.0334076	0	173	0.0289017	0.647082	0.788508
TCGA-BLCA	Presence of SNV mutations	THRAP3	0.68595	449	0.0334076	1	149	0.033557	0.647082	0.788508
TCGA-BLCA	Presence of SNV mutations	THRAP3	0.533884	449	0.0334076	2	127	0.0393701	0.647082	0.788508
TCGA-BLCA	Presence of SNV mutations	TP53	0.662802	449	0.525612	0	172	0.552326	1.26294e-08	2.1756e-07
TCGA-BLCA	Presence of SNV mutations	TP53	0.722026	449	0.525612	1	150	0.526667	1.26294e-08	2.1756e-07
TCGA-BLCA	Presence of SNV mutations	TP53	0.640373	449	0.525612	2	127	0.488189	1.26294e-08	2.1756e-07
TCGA-BLCA	Presence of SNV mutations	TPR	0.686975	449	0.0668151	0	173	0.0462428	0.000826429	0.00388267
TCGA-BLCA	Presence of SNV mutations	TPR	0.703481	449	0.0668151	1	150	0.1	0.000826429	0.00388267
TCGA-BLCA	Presence of SNV mutations	TPR	0.840194	449	0.0668151	2	126	0.0555556	0.000826429	0.00388267
TCGA-BLCA	Presence of SNV mutations	TRIM24	0.422764	449	0.0267261	0	173	0.0289017	0.0675922	0.146407
TCGA-BLCA	Presence of SNV mutations	TRIM24	0.797131	449	0.0267261	1	150	0.0266667	0.0675922	0.146407
TCGA-BLCA	Presence of SNV mutations	TRIM24	0.699454	449	0.0267261	2	126	0.0238095	0.0675922	0.146407
TCGA-BLCA	Presence of SNV mutations	TRRAP	0.576812	449	0.0979955	0	173	0.0751445	0.67248	0.806008
TCGA-BLCA	Presence of SNV mutations	TRRAP	0.556522	449	0.0979955	1	150	0.133333	0.67248	0.806008
TCGA-BLCA	Presence of SNV mutations	TRRAP	0.610845	449	0.0979955	2	126	0.0873016	0.67248	0.806008
TCGA-BLCA	Presence of SNV mutations	TSC1	0.471014	449	0.10245	0	174	0.0689655	0.634539	0.779334
TCGA-BLCA	Presence of SNV mutations	TSC1	0.42617	449	0.10245	1	149	0.154362	0.634539	0.779334
TCGA-BLCA	Presence of SNV mutations	TSC1	0.681021	449	0.10245	2	126	0.0873016	0.634539	0.779334
TCGA-BLCA	Presence of SNV mutations	TSC2	0.585366	449	0.0267261	0	173	0.0289017	0.794965	0.887779
TCGA-BLCA	Presence of SNV mutations	TSC2	0.606557	449	0.0267261	1	150	0.0266667	0.794965	0.887779
TCGA-BLCA	Presence of SNV mutations	TSC2	0.644809	449	0.0267261	2	126	0.0238095	0.794965	0.887779
TCGA-BLCA	Presence of SNV mutations	UBR5	0.45431	449	0.091314	0	171	0.0994152	0.74105	0.852029
TCGA-BLCA	Presence of SNV mutations	UBR5	0.534483	449	0.091314	1	151	0.0927152	0.74105	0.852029
TCGA-BLCA	Presence of SNV mutations	UBR5	0.602586	449	0.091314	2	127	0.0787402	0.74105	0.852029
TCGA-BLCA	Presence of SNV mutations	ZCCHC8	0.739344	449	0.0311804	0	173	0.0289017	0.293765	0.459043
TCGA-BLCA	Presence of SNV mutations	ZCCHC8	0.584016	449	0.0311804	1	150	0.0333333	0.293765	0.459043
TCGA-BLCA	Presence of SNV mutations	ZCCHC8	0.739669	449	0.0311804	2	126	0.031746	0.293765	0.459043
TCGA-BLCA	Presence of SNV mutations	ZNF521	0.530579	449	0.0334076	0	172	0.0290698	0.250614	0.407021
TCGA-BLCA	Presence of SNV mutations	ZNF521	0.639669	449	0.0334076	1	150	0.0333333	0.250614	0.407021
TCGA-BLCA	Presence of SNV mutations	ZNF521	0.73719	449	0.0334076	2	127	0.0393701	0.250614	0.407021
TCGA-BLCA	Protein under/over expression	ARID1A_UNDER	0.695527	371	0.0619946	0	153	0.0522876	0.0213879	0.0583018
TCGA-BLCA	Protein under/over expression	ARID1A_UNDER	0.694084	371	0.0619946	1	112	0.0803571	0.0213879	0.0583018
TCGA-BLCA	Protein under/over expression	ARID1A_UNDER	0.543771	371	0.0619946	2	106	0.0566038	0.0213879	0.0583018
TCGA-BLCA	Protein under/over expression	AR_OVER	0.71134	371	0.0889488	0	153	0.0980392	0.0320909	0.0812553
TCGA-BLCA	Protein under/over expression	AR_OVER	0.778923	371	0.0889488	1	112	0.0803571	0.0320909	0.0812553
TCGA-BLCA	Protein under/over expression	AR_OVER	0.56701	371	0.0889488	2	106	0.0849057	0.0320909	0.0812553
TCGA-BLCA	Protein under/over expression	ATM_UNDER	0.73425	371	0.0997305	0	153	0.124183	0.0313141	0.0796888
TCGA-BLCA	Protein under/over expression	ATM_UNDER	0.75945	371	0.0997305	1	112	0.0803571	0.0313141	0.0796888
TCGA-BLCA	Protein under/over expression	ATM_UNDER	0.626157	371	0.0997305	2	106	0.0849057	0.0313141	0.0796888
TCGA-BLCA	Protein under/over expression	BAP1_UNDER	0.808333	371	0.105121	0	153	0.117647	1.45815e-05	0.000121694
TCGA-BLCA	Protein under/over expression	BAP1_UNDER	0.738542	371	0.105121	1	112	0.0982143	1.45815e-05	0.000121694
TCGA-BLCA	Protein under/over expression	BAP1_UNDER	0.729474	371	0.105121	2	106	0.0943396	1.45815e-05	0.000121694
TCGA-BLCA	Protein under/over expression	BCL2_OVER	0.488636	371	0.0619946	0	154	0.0519481	0.471946	0.644887
TCGA-BLCA	Protein under/over expression	BCL2_OVER	0.725948	371	0.0619946	1	111	0.0720721	0.471946	0.644887
TCGA-BLCA	Protein under/over expression	BCL2_OVER	0.593294	371	0.0619946	2	106	0.0660377	0.471946	0.644887
TCGA-BLCA	Protein under/over expression	BRAF_UNDER	0.623724	371	0.107817	0	153	0.150327	0.290251	0.454369
TCGA-BLCA	Protein under/over expression	BRAF_UNDER	0.659439	371	0.107817	1	113	0.0884956	0.290251	0.454369
TCGA-BLCA	Protein under/over expression	BRAF_UNDER	0.686589	371	0.107817	2	105	0.0666667	0.290251	0.454369
TCGA-BLCA	Protein under/over expression	BRD4_UNDER	0.7114	371	0.0808625	0	153	0.0980392	0.558592	0.716447
TCGA-BLCA	Protein under/over expression	BRD4_UNDER	0.580087	371	0.0808625	1	112	0.0714286	0.558592	0.716447
TCGA-BLCA	Protein under/over expression	BRD4_UNDER	0.419825	371	0.0808625	2	106	0.0660377	0.558592	0.716447
TCGA-BLCA	Protein under/over expression	CCND1_OVER	0.619949	371	0.0781671	0	154	0.0974026	0.189088	0.326849
TCGA-BLCA	Protein under/over expression	CCND1_OVER	0.626822	371	0.0781671	1	111	0.0630631	0.189088	0.326849
TCGA-BLCA	Protein under/over expression	CCND1_OVER	0.696793	371	0.0781671	2	106	0.0660377	0.189088	0.326849
TCGA-BLCA	Protein under/over expression	CCNE1_OVER	0.675505	371	0.0619946	0	154	0.0584416	0.452383	0.625577
TCGA-BLCA	Protein under/over expression	CCNE1_OVER	0.645773	371	0.0619946	1	111	0.0630631	0.452383	0.625577
TCGA-BLCA	Protein under/over expression	CCNE1_OVER	0.603499	371	0.0619946	2	106	0.0660377	0.452383	0.625577
TCGA-BLCA	Protein under/over expression	CDH1_UNDER	0.768404	371	0.107817	0	153	0.0980392	1.69475e-05	0.000137733
TCGA-BLCA	Protein under/over expression	CDH1_UNDER	0.744417	371	0.107817	1	112	0.116071	1.69475e-05	0.000137733
TCGA-BLCA	Protein under/over expression	CDH1_UNDER	0.680108	371	0.107817	2	106	0.113208	1.69475e-05	0.000137733
TCGA-BLCA	Protein under/over expression	CDKN1B_OVER	0.473304	371	0.0673854	0	153	0.0718954	0.320484	0.488235
TCGA-BLCA	Protein under/over expression	CDKN1B_OVER	0.480519	371	0.0673854	1	112	0.0714286	0.320484	0.488235
TCGA-BLCA	Protein under/over expression	CDKN1B_OVER	0.643098	371	0.0673854	2	106	0.0566038	0.320484	0.488235
TCGA-BLCA	Protein under/over expression	CDKN2A_OVER	0.474227	371	0.0889488	0	153	0.104575	0.218422	0.366706
TCGA-BLCA	Protein under/over expression	CDKN2A_OVER	0.601375	371	0.0889488	1	112	0.0803571	0.218422	0.366706
TCGA-BLCA	Protein under/over expression	CDKN2A_OVER	0.69201	371	0.0889488	2	106	0.0754717	0.218422	0.366706
TCGA-BLCA	Protein under/over expression	CHEK2_UNDER	0.737374	371	0.0566038	0	153	0.0457516	0.00418253	0.0152992
TCGA-BLCA	Protein under/over expression	CHEK2_UNDER	0.717172	371	0.0566038	1	112	0.0714286	0.00418253	0.0152992
TCGA-BLCA	Protein under/over expression	CHEK2_UNDER	0.781145	371	0.0566038	2	106	0.0566038	0.00418253	0.0152992
TCGA-BLCA	Protein under/over expression	CTNNB1_UNDER	0.759375	371	0.105121	0	153	0.117647	9.93545e-05	0.000641863
TCGA-BLCA	Protein under/over expression	CTNNB1_UNDER	0.728125	371	0.105121	1	112	0.0982143	9.93545e-05	0.000641863
TCGA-BLCA	Protein under/over expression	CTNNB1_UNDER	0.732632	371	0.105121	2	106	0.0943396	9.93545e-05	0.000641863
TCGA-BLCA	Protein under/over expression	EGFR_OVER	0.683505	371	0.0943396	0	154	0.11039	0.00681479	0.0228349
TCGA-BLCA	Protein under/over expression	EGFR_OVER	0.645833	371	0.0943396	1	111	0.0810811	0.00681479	0.0228349
TCGA-BLCA	Protein under/over expression	EGFR_OVER	0.675926	371	0.0943396	2	106	0.0849057	0.00681479	0.0228349
TCGA-BLCA	Protein under/over expression	ESR1_OVER	0.608247	371	0.118598	0	146	0.109589	0.0393516	0.0952909
TCGA-BLCA	Protein under/over expression	ESR1_OVER	0.579611	371	0.118598	1	118	0.152542	0.0393516	0.0952909
TCGA-BLCA	Protein under/over expression	ESR1_OVER	0.68287	371	0.118598	2	107	0.0934579	0.0393516	0.0952909
TCGA-BLCA	Protein under/over expression	FOXO3_UNDER	0.629149	371	0.0592992	0	153	0.0457516	0.949429	0.972839
TCGA-BLCA	Protein under/over expression	FOXO3_UNDER	0.617605	371	0.0592992	1	112	0.0714286	0.949429	0.972839
TCGA-BLCA	Protein under/over expression	FOXO3_UNDER	0.58309	371	0.0592992	2	106	0.0660377	0.949429	0.972839
TCGA-BLCA	Protein under/over expression	G6PD_OVER	0.723214	371	0.0700809	0	152	0.0592105	8.45317e-07	9.99052e-06
TCGA-BLCA	Protein under/over expression	G6PD_OVER	0.6875	371	0.0700809	1	113	0.0884956	8.45317e-07	9.99052e-06
TCGA-BLCA	Protein under/over expression	G6PD_OVER	0.78863	371	0.0700809	2	106	0.0660377	8.45317e-07	9.99052e-06
TCGA-BLCA	Protein under/over expression	KIT_OVER	0.609278	371	0.0781671	0	154	0.0649351	0.20959	0.354089
TCGA-BLCA	Protein under/over expression	KIT_OVER	0.457176	371	0.0781671	1	111	0.0900901	0.20959	0.354089
TCGA-BLCA	Protein under/over expression	KIT_OVER	0.75	371	0.0781671	2	106	0.0849057	0.20959	0.354089
TCGA-BLCA	Protein under/over expression	LCK_OVER	0.649235	371	0.0808625	0	153	0.0980392	0.0195786	0.0544374
TCGA-BLCA	Protein under/over expression	LCK_OVER	0.639031	371	0.0808625	1	112	0.0714286	0.0195786	0.0544374
TCGA-BLCA	Protein under/over expression	LCK_OVER	0.66035	371	0.0808625	2	106	0.0660377	0.0195786	0.0544374
TCGA-BLCA	Protein under/over expression	LCK_UNDER	0.848485	371	0.06469	0	154	0.0519481	4.75563e-10	1.09542e-08
TCGA-BLCA	Protein under/over expression	LCK_UNDER	0.763848	371	0.06469	1	111	0.0810811	4.75563e-10	1.09542e-08
TCGA-BLCA	Protein under/over expression	LCK_UNDER	0.740525	371	0.06469	2	106	0.0660377	4.75563e-10	1.09542e-08
TCGA-BLCA	Protein under/over expression	MYC_OVER	0.627721	371	0.102426	0	153	0.124183	0.109256	0.21494
TCGA-BLCA	Protein under/over expression	MYC_OVER	0.717068	371	0.102426	1	113	0.0973451	0.109256	0.21494
TCGA-BLCA	Protein under/over expression	MYC_OVER	0.659794	371	0.102426	2	105	0.0761905	0.109256	0.21494
TCGA-BLCA	Protein under/over expression	MYH11_OVER	0.769504	371	0.137466	0	147	0.136054	2.8084e-05	0.000212795
TCGA-BLCA	Protein under/over expression	MYH11_OVER	0.698582	371	0.137466	1	118	0.161017	2.8084e-05	0.000212795
TCGA-BLCA	Protein under/over expression	MYH11_OVER	0.866487	371	0.137466	2	106	0.113208	2.8084e-05	0.000212795
TCGA-BLCA	Protein under/over expression	NF2_OVER	0.546717	371	0.0619946	0	154	0.0519481	0.902838	0.946512
TCGA-BLCA	Protein under/over expression	NF2_OVER	0.48105	371	0.0619946	1	111	0.0720721	0.902838	0.946512
TCGA-BLCA	Protein under/over expression	NF2_OVER	0.635569	371	0.0619946	2	106	0.0660377	0.902838	0.946512
TCGA-BLCA	Protein under/over expression	NOTCH1_OVER	0.706758	371	0.0754717	0	153	0.0653595	0.0370986	0.0912969
TCGA-BLCA	Protein under/over expression	NOTCH1_OVER	0.613975	371	0.0754717	1	112	0.0892857	0.0370986	0.0912969
TCGA-BLCA	Protein under/over expression	NOTCH1_OVER	0.739691	371	0.0754717	2	106	0.0754717	0.0370986	0.0912969
TCGA-BLCA	Protein under/over expression	NRG1_OVER	0.584184	371	0.0673854	0	153	0.0522876	0.302083	0.467446
TCGA-BLCA	Protein under/over expression	NRG1_OVER	0.663265	371	0.0673854	1	112	0.0803571	0.302083	0.467446
TCGA-BLCA	Protein under/over expression	NRG1_OVER	0.636598	371	0.0673854	2	106	0.0754717	0.302083	0.467446
TCGA-BLCA	Protein under/over expression	PTEN_UNDER	0.492063	371	0.0727763	0	154	0.0649351	0.847287	0.918122
TCGA-BLCA	Protein under/over expression	PTEN_UNDER	0.748711	371	0.0727763	1	111	0.0810811	0.847287	0.918122
TCGA-BLCA	Protein under/over expression	PTEN_UNDER	0.502577	371	0.0727763	2	106	0.0754717	0.847287	0.918122
TCGA-BLCA	Protein under/over expression	RBM15_UNDER	0.760132	371	0.126685	0	153	0.130719	0.197477	0.338016
TCGA-BLCA	Protein under/over expression	RBM15_UNDER	0.64847	371	0.126685	1	111	0.117117	0.197477	0.338016
TCGA-BLCA	Protein under/over expression	RBM15_UNDER	0.452341	371	0.126685	2	107	0.130841	0.197477	0.338016
TCGA-BLCA	Protein under/over expression	SETD2_OVER	0.602041	371	0.083558	0	153	0.0980392	0.170261	0.300886
TCGA-BLCA	Protein under/over expression	SETD2_OVER	0.635204	371	0.083558	1	112	0.0803571	0.170261	0.300886
TCGA-BLCA	Protein under/over expression	SETD2_OVER	0.644315	371	0.083558	2	106	0.0660377	0.170261	0.300886
TCGA-BLCA	Protein under/over expression	STK11_OVER	0.627551	371	0.083558	0	153	0.0980392	0.41716	0.593565
TCGA-BLCA	Protein under/over expression	STK11_OVER	0.565051	371	0.083558	1	112	0.0803571	0.41716	0.593565
TCGA-BLCA	Protein under/over expression	STK11_OVER	0.623907	371	0.083558	2	106	0.0660377	0.41716	0.593565
TCGA-BLCA	Protein under/over expression	SYK_UNDER	0.829082	371	0.0943396	0	154	0.123377	0.000444499	0.0023001
TCGA-BLCA	Protein under/over expression	SYK_UNDER	0.608418	371	0.0943396	1	110	0.0727273	0.000444499	0.0023001
TCGA-BLCA	Protein under/over expression	SYK_UNDER	0.631195	371	0.0943396	2	107	0.0747664	0.000444499	0.0023001
TCGA-BLCA	Protein under/over expression	TFRC_OVER	0.558442	371	0.0592992	0	153	0.0522876	0.0123199	0.0371161
TCGA-BLCA	Protein under/over expression	TFRC_OVER	0.649351	371	0.0592992	1	111	0.0630631	0.0123199	0.0371161
TCGA-BLCA	Protein under/over expression	TFRC_OVER	0.627946	371	0.0592992	2	107	0.0654206	0.0123199	0.0371161
TCGA-BLCA	Protein under/over expression	TFRC_UNDER	0.708514	371	0.0566038	0	153	0.0457516	0.198629	0.339557
TCGA-BLCA	Protein under/over expression	TFRC_UNDER	0.611833	371	0.0566038	1	112	0.0625	0.198629	0.339557
TCGA-BLCA	Protein under/over expression	TFRC_UNDER	0.559767	371	0.0566038	2	106	0.0660377	0.198629	0.339557
TCGA-BLCA	Protein under/over expression	TSC1_UNDER	0.683081	371	0.118598	0	154	0.181818	0.000396403	0.00207789
TCGA-BLCA	Protein under/over expression	TSC1_UNDER	0.702624	371	0.118598	1	110	0.0727273	0.000396403	0.00207789
TCGA-BLCA	Protein under/over expression	TSC1_UNDER	0.800292	371	0.118598	2	107	0.0747664	0.000396403	0.00207789
TCGA-BLCA	Protein under/over expression	TSC2_UNDER	0.67354	371	0.102426	0	153	0.124183	0.133964	0.2507
TCGA-BLCA	Protein under/over expression	TSC2_UNDER	0.742268	371	0.102426	1	112	0.0892857	0.133964	0.2507
TCGA-BLCA	Protein under/over expression	TSC2_UNDER	0.561343	371	0.102426	2	106	0.0849057	0.133964	0.2507
TCGA-BLCA	Protein under/over expression	WWTR1_OVER	0.855867	371	0.0997305	0	155	0.135484	0.000124521	0.000778209
TCGA-BLCA	Protein under/over expression	WWTR1_OVER	0.839286	371	0.0997305	1	110	0.0818182	0.000124521	0.000778209
TCGA-BLCA	Protein under/over expression	WWTR1_OVER	0.686589	371	0.0997305	2	106	0.0660377	0.000124521	0.000778209
TCGA-BLCA	Clinical outcomes and treatment responses	CISPLATIN_response	0.76	99	0.343434	0	52	0.288462	0.177928	0.311431
TCGA-BLCA	Clinical outcomes and treatment responses	CISPLATIN_response	0.58	99	0.343434	1	29	0.344828	0.177928	0.311431
TCGA-BLCA	Clinical outcomes and treatment responses	CISPLATIN_response	0.432099	99	0.343434	2	18	0.5	0.177928	0.311431
TCGA-BLCA	Clinical outcomes and treatment responses	DFI	0.636735	197	0.187817	0	75	0.253333	0.144533	0.264824
TCGA-BLCA	Clinical outcomes and treatment responses	DFI	0.678005	197	0.187817	1	63	0.142857	0.144533	0.264824
TCGA-BLCA	Clinical outcomes and treatment responses	DFI	0.603175	197	0.187817	2	59	0.152542	0.144533	0.264824
TCGA-BLCA	Clinical outcomes and treatment responses	DSS	0.470085	437	0.331808	0	164	0.347561	0.00418637	0.0152994
TCGA-BLCA	Clinical outcomes and treatment responses	DSS	0.639098	437	0.331808	1	152	0.328947	0.00418637	0.0152994
TCGA-BLCA	Clinical outcomes and treatment responses	DSS	0.683576	437	0.331808	2	121	0.31405	0.00418637	0.0152994
TCGA-BLCA	Clinical outcomes and treatment responses	GEMCITABINE_response	0.55303	77	0.467532	0	32	0.5	0.0373339	0.0916523
TCGA-BLCA	Clinical outcomes and treatment responses	GEMCITABINE_response	0.781818	77	0.467532	1	24	0.416667	0.0373339	0.0916523
TCGA-BLCA	Clinical outcomes and treatment responses	GEMCITABINE_response	0.681818	77	0.467532	2	21	0.47619	0.0373339	0.0916523
TCGA-BLCA	Clinical outcomes and treatment responses	OS	0.577945	450	0.464444	0	169	0.449704	0.053293	0.120723
TCGA-BLCA	Clinical outcomes and treatment responses	OS	0.510777	450	0.464444	1	156	0.49359	0.053293	0.120723
TCGA-BLCA	Clinical outcomes and treatment responses	OS	0.572464	450	0.464444	2	125	0.448	0.053293	0.120723
TCGA-BLCA	Clinical outcomes and treatment responses	PFI	0.592085	450	0.448889	0	173	0.491329	0.000439849	0.00227896
TCGA-BLCA	Clinical outcomes and treatment responses	PFI	0.621512	450	0.448889	1	152	0.421053	0.000439849	0.00227896
TCGA-BLCA	Clinical outcomes and treatment responses	PFI	0.653302	450	0.448889	2	125	0.424	0.000439849	0.00227896
TCGA-BLCA	Clinical outcomes and treatment responses	treatment_response	0.683987	356	0.688202	0	143	0.678322	9.92224e-05	0.000641863
TCGA-BLCA	Clinical outcomes and treatment responses	treatment_response	0.633444	356	0.688202	1	111	0.675676	9.92224e-05	0.000641863
TCGA-BLCA	Clinical outcomes and treatment responses	treatment_response	0.626984	356	0.688202	2	102	0.715686	9.92224e-05	0.000641863
TCGA-BLCA	Transcriptome under/over expression	AKT2_OVER	0.515931	446	0.168161	0	173	0.144509	0.112913	0.220627
TCGA-BLCA	Transcriptome under/over expression	AKT2_OVER	0.57137	446	0.168161	1	148	0.182432	0.112913	0.220627
TCGA-BLCA	Transcriptome under/over expression	AKT2_OVER	0.588463	446	0.168161	2	125	0.184	0.112913	0.220627
TCGA-BLCA	Transcriptome under/over expression	ARNT_OVER	0.577037	446	0.179372	0	172	0.19186	0.155408	0.280667
TCGA-BLCA	Transcriptome under/over expression	ARNT_OVER	0.606138	446	0.179372	1	149	0.167785	0.155408	0.280667
TCGA-BLCA	Transcriptome under/over expression	ARNT_OVER	0.614082	446	0.179372	2	125	0.176	0.155408	0.280667
TCGA-BLCA	Transcriptome under/over expression	ASXL1_OVER	0.558566	446	0.179372	0	172	0.174419	0.0115652	0.035425
TCGA-BLCA	Transcriptome under/over expression	ASXL1_OVER	0.570168	446	0.179372	1	149	0.187919	0.0115652	0.035425
TCGA-BLCA	Transcriptome under/over expression	ASXL1_OVER	0.724457	446	0.179372	2	125	0.176	0.0115652	0.035425
TCGA-BLCA	Transcriptome under/over expression	ATR_OVER	0.665465	446	0.132287	0	173	0.16763	0.170452	0.301092
TCGA-BLCA	Transcriptome under/over expression	ATR_OVER	0.410303	446	0.132287	1	148	0.108108	0.170452	0.301092
TCGA-BLCA	Transcriptome under/over expression	ATR_OVER	0.653247	446	0.132287	2	125	0.112	0.170452	0.301092
TCGA-BLCA	Transcriptome under/over expression	BCL9_OVER	0.519211	446	0.139013	0	171	0.140351	0.138666	0.257264
TCGA-BLCA	Transcriptome under/over expression	BCL9_OVER	0.614746	446	0.139013	1	149	0.127517	0.138666	0.257264
TCGA-BLCA	Transcriptome under/over expression	BCL9_OVER	0.582035	446	0.139013	2	126	0.150794	0.138666	0.257264
TCGA-BLCA	Transcriptome under/over expression	CANT1_OVER	0.556584	446	0.141256	0	172	0.145349	0.290419	0.454457
TCGA-BLCA	Transcriptome under/over expression	CANT1_OVER	0.624183	446	0.141256	1	149	0.14094	0.290419	0.454457
TCGA-BLCA	Transcriptome under/over expression	CANT1_OVER	0.546454	446	0.141256	2	125	0.136	0.290419	0.454457
TCGA-BLCA	Transcriptome under/over expression	CBLC_OVER	0.509871	446	0.0852018	0	171	0.0760234	0.382717	0.556341
TCGA-BLCA	Transcriptome under/over expression	CBLC_OVER	0.618132	446	0.0852018	1	150	0.0866667	0.382717	0.556341
TCGA-BLCA	Transcriptome under/over expression	CBLC_OVER	0.565476	446	0.0852018	2	125	0.096	0.382717	0.556341
TCGA-BLCA	Transcriptome under/over expression	CCND1_OVER	0.584384	446	0.130045	0	173	0.144509	0.0276364	0.0717336
TCGA-BLCA	Transcriptome under/over expression	CCND1_OVER	0.633939	446	0.130045	1	148	0.128378	0.0276364	0.0717336
TCGA-BLCA	Transcriptome under/over expression	CCND1_OVER	0.762338	446	0.130045	2	125	0.112	0.0276364	0.0717336
TCGA-BLCA	Transcriptome under/over expression	CEP89_OVER	0.466154	446	0.2287	0	171	0.233918	0.881979	0.934365
TCGA-BLCA	Transcriptome under/over expression	CEP89_OVER	0.520202	446	0.2287	1	150	0.246667	0.881979	0.934365
TCGA-BLCA	Transcriptome under/over expression	CEP89_OVER	0.556364	446	0.2287	2	125	0.2	0.881979	0.934365
TCGA-BLCA	Transcriptome under/over expression	CHCHD7_OVER	0.710007	446	0.103139	0	171	0.0935673	0.00355352	0.0132755
TCGA-BLCA	Transcriptome under/over expression	CHCHD7_OVER	0.666896	446	0.103139	1	150	0.12	0.00355352	0.0132755
TCGA-BLCA	Transcriptome under/over expression	CHCHD7_OVER	0.619792	446	0.103139	2	125	0.096	0.00355352	0.0132755
TCGA-BLCA	Transcriptome under/over expression	CLTC_OVER	0.649757	446	0.130045	0	173	0.121387	0.0180854	0.0507675
TCGA-BLCA	Transcriptome under/over expression	CLTC_OVER	0.545298	446	0.130045	1	148	0.135135	0.0180854	0.0507675
TCGA-BLCA	Transcriptome under/over expression	CLTC_OVER	0.671296	446	0.130045	2	125	0.136	0.0180854	0.0507675
TCGA-BLCA	Transcriptome under/over expression	CNBP_OVER	0.622727	446	0.136771	0	166	0.144578	0.0965169	0.194725
TCGA-BLCA	Transcriptome under/over expression	CNBP_OVER	0.641212	446	0.136771	1	155	0.141935	0.0965169	0.194725
TCGA-BLCA	Transcriptome under/over expression	CNBP_OVER	0.613456	446	0.136771	2	125	0.12	0.0965169	0.194725
TCGA-BLCA	Transcriptome under/over expression	CNOT3_OVER	0.621914	446	0.147982	0	172	0.110465	0.0289686	0.0745199
TCGA-BLCA	Transcriptome under/over expression	CNOT3_OVER	0.698858	446	0.147982	1	149	0.194631	0.0289686	0.0745199
TCGA-BLCA	Transcriptome under/over expression	CNOT3_OVER	0.657504	446	0.147982	2	125	0.144	0.0289686	0.0745199
TCGA-BLCA	Transcriptome under/over expression	COX6C_OVER	0.643846	446	0.233184	0	171	0.233918	7.98698e-05	0.000533922
TCGA-BLCA	Transcriptome under/over expression	COX6C_OVER	0.602176	446	0.233184	1	150	0.26	7.98698e-05	0.000533922
TCGA-BLCA	Transcriptome under/over expression	COX6C_OVER	0.717576	446	0.233184	2	125	0.2	7.98698e-05	0.000533922
TCGA-BLCA	Transcriptome under/over expression	DDX5_OVER	0.669241	446	0.112108	0	172	0.0872093	0.00024265	0.001368
TCGA-BLCA	Transcriptome under/over expression	DDX5_OVER	0.631918	446	0.112108	1	148	0.141892	0.00024265	0.001368
TCGA-BLCA	Transcriptome under/over expression	DDX5_OVER	0.6139	446	0.112108	2	126	0.111111	0.00024265	0.001368
TCGA-BLCA	Transcriptome under/over expression	DEK_OVER	0.760618	446	0.103139	0	171	0.0877193	3.45751e-05	0.000255729
TCGA-BLCA	Transcriptome under/over expression	DEK_OVER	0.720077	446	0.103139	1	149	0.114094	3.45751e-05	0.000255729
TCGA-BLCA	Transcriptome under/over expression	DEK_OVER	0.725225	446	0.103139	2	126	0.111111	3.45751e-05	0.000255729
TCGA-BLCA	Transcriptome under/over expression	EGFR_OVER	0.665519	446	0.134529	0	173	0.127168	0.0603163	0.133591
TCGA-BLCA	Transcriptome under/over expression	EGFR_OVER	0.575805	446	0.134529	1	148	0.128378	0.0603163	0.133591
TCGA-BLCA	Transcriptome under/over expression	EGFR_OVER	0.654088	446	0.134529	2	125	0.152	0.0603163	0.133591
TCGA-BLCA	Transcriptome under/over expression	ERBB2_OVER	0.638393	446	0.11435	0	172	0.133721	0.0153787	0.0445981
TCGA-BLCA	Transcriptome under/over expression	ERBB2_OVER	0.555341	446	0.11435	1	149	0.0939597	0.0153787	0.0445981
TCGA-BLCA	Transcriptome under/over expression	ERBB2_OVER	0.791407	446	0.11435	2	125	0.112	0.0153787	0.0445981
TCGA-BLCA	Transcriptome under/over expression	ERCC2_OVER	0.554847	446	0.127803	0	173	0.0867052	0.784558	0.880689
TCGA-BLCA	Transcriptome under/over expression	ERCC2_OVER	0.494208	446	0.127803	1	148	0.195946	0.784558	0.880689
TCGA-BLCA	Transcriptome under/over expression	ERCC2_OVER	0.629938	446	0.127803	2	125	0.104	0.784558	0.880689
TCGA-BLCA	Transcriptome under/over expression	FANCD2_OVER	0.620283	446	0.170404	0	172	0.203488	0.00170215	0.0071547
TCGA-BLCA	Transcriptome under/over expression	FANCD2_OVER	0.604767	446	0.170404	1	149	0.14094	0.00170215	0.0071547
TCGA-BLCA	Transcriptome under/over expression	FANCD2_OVER	0.722306	446	0.170404	2	125	0.16	0.00170215	0.0071547
TCGA-BLCA	Transcriptome under/over expression	FH_OVER	0.6875	446	0.11435	0	172	0.0872093	8.18162e-05	0.00054333
TCGA-BLCA	Transcriptome under/over expression	FH_OVER	0.657014	446	0.11435	1	149	0.154362	8.18162e-05	0.00054333
TCGA-BLCA	Transcriptome under/over expression	FH_OVER	0.611227	446	0.11435	2	125	0.104	8.18162e-05	0.00054333
TCGA-BLCA	Transcriptome under/over expression	GMPS_OVER	0.683756	446	0.130045	0	172	0.145349	9.34153e-05	0.000608678
TCGA-BLCA	Transcriptome under/over expression	GMPS_OVER	0.620986	446	0.130045	1	149	0.114094	9.34153e-05	0.000608678
TCGA-BLCA	Transcriptome under/over expression	GMPS_OVER	0.644676	446	0.130045	2	125	0.128	9.34153e-05	0.000608678
TCGA-BLCA	Transcriptome under/over expression	HSP90AB1_OVER	0.642857	446	0.118834	0	167	0.0958084	0.00691863	0.0231061
TCGA-BLCA	Transcriptome under/over expression	HSP90AB1_OVER	0.565637	446	0.118834	1	154	0.155844	0.00691863	0.0231061
TCGA-BLCA	Transcriptome under/over expression	HSP90AB1_OVER	0.742204	446	0.118834	2	125	0.104	0.00691863	0.0231061
TCGA-BLCA	Transcriptome under/over expression	KAT6A_OVER	0.495879	446	0.0941704	0	173	0.0924855	0.898674	0.944416
TCGA-BLCA	Transcriptome under/over expression	KAT6A_OVER	0.45467	446	0.0941704	1	147	0.0884354	0.898674	0.944416
TCGA-BLCA	Transcriptome under/over expression	KAT6A_OVER	0.592033	446	0.0941704	2	126	0.103175	0.898674	0.944416
TCGA-BLCA	Transcriptome under/over expression	LSM14A_OVER	0.547619	446	0.165919	0	171	0.128655	0.173699	0.305177
TCGA-BLCA	Transcriptome under/over expression	LSM14A_OVER	0.558571	446	0.165919	1	149	0.208054	0.173699	0.305177
TCGA-BLCA	Transcriptome under/over expression	LSM14A_OVER	0.59	446	0.165919	2	126	0.166667	0.173699	0.305177
TCGA-BLCA	Transcriptome under/over expression	MDM2_OVER	0.481982	446	0.100897	0	172	0.0930233	0.66555	0.803002
TCGA-BLCA	Transcriptome under/over expression	MDM2_OVER	0.53861	446	0.100897	1	148	0.101351	0.66555	0.803002
TCGA-BLCA	Transcriptome under/over expression	MDM2_OVER	0.557272	446	0.100897	2	126	0.111111	0.66555	0.803002
TCGA-BLCA	Transcriptome under/over expression	MLF1_OVER	0.646684	446	0.118834	0	172	0.127907	0.224427	0.374603
TCGA-BLCA	Transcriptome under/over expression	MLF1_OVER	0.505792	446	0.118834	1	149	0.114094	0.224427	0.374603
TCGA-BLCA	Transcriptome under/over expression	MLF1_OVER	0.580735	446	0.118834	2	125	0.112	0.224427	0.374603
TCGA-BLCA	Transcriptome under/over expression	MSH2_OVER	0.686862	446	0.0896861	0	172	0.0755814	0.0109352	0.0338945
TCGA-BLCA	Transcriptome under/over expression	MSH2_OVER	0.661401	446	0.0896861	1	149	0.0939597	0.0109352	0.0338945
TCGA-BLCA	Transcriptome under/over expression	MSH2_OVER	0.613095	446	0.0896861	2	125	0.104	0.0109352	0.0338945
TCGA-BLCA	Transcriptome under/over expression	MYCL_OVER	0.608108	446	0.134529	0	173	0.179191	0.0266274	0.0699252
TCGA-BLCA	Transcriptome under/over expression	MYCL_OVER	0.578507	446	0.134529	1	147	0.102041	0.0266274	0.0699252
TCGA-BLCA	Transcriptome under/over expression	MYCL_OVER	0.767696	446	0.134529	2	126	0.111111	0.0266274	0.0699252
TCGA-BLCA	Transcriptome under/over expression	NBN_OVER	0.550699	446	0.170404	0	172	0.145349	0.0518796	0.118418
TCGA-BLCA	Transcriptome under/over expression	NBN_OVER	0.566196	446	0.170404	1	149	0.201342	0.0518796	0.118418
TCGA-BLCA	Transcriptome under/over expression	NBN_OVER	0.647249	446	0.170404	2	125	0.168	0.0518796	0.118418
TCGA-BLCA	Transcriptome under/over expression	NCOA1_OVER	0.615187	446	0.127803	0	170	0.158824	0.0496077	0.114661
TCGA-BLCA	Transcriptome under/over expression	NCOA1_OVER	0.610039	446	0.127803	1	150	0.1	0.0496077	0.114661
TCGA-BLCA	Transcriptome under/over expression	NCOA1_OVER	0.62677	446	0.127803	2	126	0.119048	0.0496077	0.114661
TCGA-BLCA	Transcriptome under/over expression	NF1_OVER	0.544745	446	0.121076	0	173	0.132948	0.0577187	0.128971
TCGA-BLCA	Transcriptome under/over expression	NF1_OVER	0.772844	446	0.121076	1	147	0.102041	0.0577187	0.128971
TCGA-BLCA	Transcriptome under/over expression	NF1_OVER	0.569481	446	0.121076	2	126	0.126984	0.0577187	0.128971
TCGA-BLCA	Transcriptome under/over expression	NUP98_UNDER	0.543956	446	0.105381	0	171	0.0994152	0.164879	0.292916
TCGA-BLCA	Transcriptome under/over expression	NUP98_UNDER	0.593407	446	0.105381	1	149	0.114094	0.164879	0.292916
TCGA-BLCA	Transcriptome under/over expression	NUP98_UNDER	0.598214	446	0.105381	2	126	0.103175	0.164879	0.292916
TCGA-BLCA	Transcriptome under/over expression	PBX1_OVER	0.634566	446	0.0919283	0	173	0.0809249	0.0475482	0.110918
TCGA-BLCA	Transcriptome under/over expression	PBX1_OVER	0.449176	446	0.0919283	1	148	0.0945946	0.0475482	0.110918
TCGA-BLCA	Transcriptome under/over expression	PBX1_OVER	0.681913	446	0.0919283	2	125	0.104	0.0475482	0.110918
TCGA-BLCA	Transcriptome under/over expression	PIK3CA_OVER	0.695031	446	0.105381	0	171	0.122807	0.17244	0.303647
TCGA-BLCA	Transcriptome under/over expression	PIK3CA_OVER	0.539148	446	0.105381	1	150	0.0933333	0.17244	0.303647
TCGA-BLCA	Transcriptome under/over expression	PIK3CA_OVER	0.584821	446	0.105381	2	125	0.096	0.17244	0.303647
TCGA-BLCA	Transcriptome under/over expression	PLCG1_OVER	0.58068	446	0.156951	0	171	0.181287	0.00735166	0.0244107
TCGA-BLCA	Transcriptome under/over expression	PLCG1_OVER	0.590596	446	0.156951	1	150	0.153333	0.00735166	0.0244107
TCGA-BLCA	Transcriptome under/over expression	PLCG1_OVER	0.664931	446	0.156951	2	125	0.128	0.00735166	0.0244107
TCGA-BLCA	Transcriptome under/over expression	PMS2_OVER	0.580357	446	0.121076	0	171	0.134503	0.0012308	0.00537546
TCGA-BLCA	Transcriptome under/over expression	PMS2_OVER	0.581725	446	0.121076	1	150	0.12	0.0012308	0.00537546
TCGA-BLCA	Transcriptome under/over expression	PMS2_OVER	0.683992	446	0.121076	2	125	0.104	0.0012308	0.00537546
TCGA-BLCA	Transcriptome under/over expression	PPARG_OVER	0.706633	446	0.132287	0	172	0.156977	3.33912e-05	0.000247882
TCGA-BLCA	Transcriptome under/over expression	PPARG_OVER	0.677198	446	0.132287	1	144	0.0972222	3.33912e-05	0.000247882
TCGA-BLCA	Transcriptome under/over expression	PPARG_OVER	0.738046	446	0.132287	2	130	0.138462	3.33912e-05	0.000247882
TCGA-BLCA	Transcriptome under/over expression	PPP2R1A_OVER	0.582908	446	0.116592	0	172	0.0930233	0.301198	0.466972
TCGA-BLCA	Transcriptome under/over expression	PPP2R1A_OVER	0.532175	446	0.116592	1	149	0.154362	0.301198	0.466972
TCGA-BLCA	Transcriptome under/over expression	PPP2R1A_OVER	0.663202	446	0.116592	2	125	0.104	0.301198	0.466972
TCGA-BLCA	Transcriptome under/over expression	PPP6C_UNDER	0.758182	446	0.105381	0	170	0.1	7.77343e-13	2.92848e-11
TCGA-BLCA	Transcriptome under/over expression	PPP6C_UNDER	0.727273	446	0.105381	1	150	0.1	7.77343e-13	2.92848e-11
TCGA-BLCA	Transcriptome under/over expression	PPP6C_UNDER	0.80303	446	0.105381	2	126	0.119048	7.77343e-13	2.92848e-11
TCGA-BLCA	Transcriptome under/over expression	PRCC_OVER	0.611239	446	0.112108	0	170	0.1	0.272374	0.431853
TCGA-BLCA	Transcriptome under/over expression	PRCC_OVER	0.508601	446	0.112108	1	150	0.106667	0.272374	0.431853
TCGA-BLCA	Transcriptome under/over expression	PRCC_OVER	0.513761	446	0.112108	2	126	0.134921	0.272374	0.431853
TCGA-BLCA	Transcriptome under/over expression	RAD21_OVER	0.580903	446	0.246637	0	172	0.232558	0.135351	0.252508
TCGA-BLCA	Transcriptome under/over expression	RAD21_OVER	0.533046	446	0.246637	1	149	0.275168	0.135351	0.252508
TCGA-BLCA	Transcriptome under/over expression	RAD21_OVER	0.622505	446	0.246637	2	125	0.232	0.135351	0.252508
TCGA-BLCA	Transcriptome under/over expression	RAF1_OVER	0.625959	446	0.29148	0	172	0.319767	8.32473e-07	9.95239e-06
TCGA-BLCA	Transcriptome under/over expression	RAF1_OVER	0.700922	446	0.29148	1	149	0.275168	8.32473e-07	9.95239e-06
TCGA-BLCA	Transcriptome under/over expression	RAF1_OVER	0.674659	446	0.29148	2	125	0.272	8.32473e-07	9.95239e-06
TCGA-BLCA	Transcriptome under/over expression	RECQL4_OVER	0.614948	446	0.172646	0	172	0.139535	0.00054013	0.00271479
TCGA-BLCA	Transcriptome under/over expression	RECQL4_OVER	0.634157	446	0.172646	1	149	0.214765	0.00054013	0.00271479
TCGA-BLCA	Transcriptome under/over expression	RECQL4_OVER	0.69117	446	0.172646	2	125	0.168	0.00054013	0.00271479
TCGA-BLCA	Transcriptome under/over expression	RMI2_OVER	0.63921	446	0.0964126	0	173	0.0751445	0.0443917	0.10526
TCGA-BLCA	Transcriptome under/over expression	RMI2_OVER	0.582418	446	0.0964126	1	148	0.121622	0.0443917	0.10526
TCGA-BLCA	Transcriptome under/over expression	RMI2_OVER	0.738839	446	0.0964126	2	125	0.096	0.0443917	0.10526
TCGA-BLCA	Transcriptome under/over expression	RPN1_OVER	0.507547	446	0.134529	0	171	0.116959	0.20498	0.348052
TCGA-BLCA	Transcriptome under/over expression	RPN1_OVER	0.551429	446	0.134529	1	150	0.14	0.20498	0.348052
TCGA-BLCA	Transcriptome under/over expression	RPN1_OVER	0.627569	446	0.134529	2	125	0.152	0.20498	0.348052
TCGA-BLCA	Transcriptome under/over expression	SDC4_OVER	0.625826	446	0.127803	0	174	0.166667	0.075469	0.159701
TCGA-BLCA	Transcriptome under/over expression	SDC4_OVER	0.614543	446	0.127803	1	147	0.0952381	0.075469	0.159701
TCGA-BLCA	Transcriptome under/over expression	SDC4_OVER	0.591558	446	0.127803	2	125	0.112	0.075469	0.159701
TCGA-BLCA	Transcriptome under/over expression	SDHC_OVER	0.629514	446	0.213004	0	173	0.179191	0.000392175	0.00206378
TCGA-BLCA	Transcriptome under/over expression	SDHC_OVER	0.596491	446	0.213004	1	148	0.236486	0.000392175	0.00206378
TCGA-BLCA	Transcriptome under/over expression	SDHC_OVER	0.676951	446	0.213004	2	125	0.232	0.000392175	0.00206378
TCGA-BLCA	Transcriptome under/over expression	SMARCE1_OVER	0.644444	446	0.112108	0	172	0.0930233	0.00307124	0.011757
TCGA-BLCA	Transcriptome under/over expression	SMARCE1_OVER	0.655084	446	0.112108	1	149	0.127517	0.00307124	0.011757
TCGA-BLCA	Transcriptome under/over expression	SMARCE1_OVER	0.772727	446	0.112108	2	125	0.12	0.00307124	0.011757
TCGA-BLCA	Transcriptome under/over expression	SND1_OVER	0.546703	446	0.103139	0	171	0.0935673	0.544221	0.704255
TCGA-BLCA	Transcriptome under/over expression	SND1_OVER	0.538462	446	0.103139	1	149	0.114094	0.544221	0.704255
TCGA-BLCA	Transcriptome under/over expression	SND1_OVER	0.683379	446	0.103139	2	126	0.103175	0.544221	0.704255
TCGA-BLCA	Transcriptome under/over expression	SS18L1_OVER	0.708108	446	0.136771	0	173	0.184971	2.11793e-05	0.000167072
TCGA-BLCA	Transcriptome under/over expression	SS18L1_OVER	0.59697	446	0.136771	1	148	0.101351	2.11793e-05	0.000167072
TCGA-BLCA	Transcriptome under/over expression	SS18L1_OVER	0.71039	446	0.136771	2	125	0.112	2.11793e-05	0.000167072
TCGA-BLCA	Transcriptome under/over expression	SS18_OVER	0.625687	446	0.103139	0	170	0.0764706	0.00571418	0.0197208
TCGA-BLCA	Transcriptome under/over expression	SS18_OVER	0.684753	446	0.103139	1	150	0.133333	0.00571418	0.0197208
TCGA-BLCA	Transcriptome under/over expression	SS18_OVER	0.70261	446	0.103139	2	126	0.103175	0.00571418	0.0197208
TCGA-BLCA	Transcriptome under/over expression	SS18_UNDER	0.591559	446	0.0852018	0	171	0.0760234	0.548341	0.707875
TCGA-BLCA	Transcriptome under/over expression	SS18_UNDER	0.537775	446	0.0852018	1	150	0.0866667	0.548341	0.707875
TCGA-BLCA	Transcriptome under/over expression	SS18_UNDER	0.464286	446	0.0852018	2	125	0.096	0.548341	0.707875
TCGA-BLCA	Transcriptome under/over expression	TAF15_OVER	0.569347	446	0.116592	0	172	0.110465	0.107583	0.212373
TCGA-BLCA	Transcriptome under/over expression	TAF15_OVER	0.635894	446	0.116592	1	149	0.107383	0.107583	0.212373
TCGA-BLCA	Transcriptome under/over expression	TAF15_OVER	0.653356	446	0.116592	2	125	0.136	0.107583	0.212373
TCGA-BLCA	Transcriptome under/over expression	TCEA1_OVER	0.500638	446	0.100897	0	172	0.0872093	0.997675	0.998418
TCGA-BLCA	Transcriptome under/over expression	TCEA1_OVER	0.453984	446	0.100897	1	149	0.114094	0.997675	0.998418
TCGA-BLCA	Transcriptome under/over expression	TCEA1_OVER	0.57034	446	0.100897	2	125	0.104	0.997675	0.998418
TCGA-BLCA	Transcriptome under/over expression	TFG_OVER	0.599528	446	0.17713	0	172	0.19186	0.0701205	0.150911
TCGA-BLCA	Transcriptome under/over expression	TFG_OVER	0.5715	446	0.17713	1	149	0.181208	0.0701205	0.150911
TCGA-BLCA	Transcriptome under/over expression	TFG_OVER	0.622055	446	0.17713	2	125	0.152	0.0701205	0.150911
TCGA-BLCA	Transcriptome under/over expression	TFRC_OVER	0.509091	446	0.143498	0	166	0.150602	0.0801989	0.167071
TCGA-BLCA	Transcriptome under/over expression	TFRC_OVER	0.676606	446	0.143498	1	155	0.154839	0.0801989	0.167071
TCGA-BLCA	Transcriptome under/over expression	TFRC_OVER	0.525382	446	0.143498	2	125	0.12	0.0801989	0.167071
TCGA-BLCA	Transcriptome under/over expression	TMPRSS2_OVER	0.654187	446	0.123318	0	172	0.162791	0.00193811	0.00802109
TCGA-BLCA	Transcriptome under/over expression	TMPRSS2_OVER	0.600275	446	0.123318	1	149	0.0939597	0.00193811	0.00802109
TCGA-BLCA	Transcriptome under/over expression	TMPRSS2_OVER	0.720238	446	0.123318	2	125	0.104	0.00193811	0.00802109
TCGA-BLCA	Transcriptome under/over expression	TPM3_OVER	0.673747	446	0.116592	0	171	0.0994152	6.62953e-07	8.0736e-06
TCGA-BLCA	Transcriptome under/over expression	TPM3_OVER	0.722222	446	0.116592	1	149	0.120805	6.62953e-07	8.0736e-06
TCGA-BLCA	Transcriptome under/over expression	TPM3_OVER	0.78268	446	0.116592	2	126	0.134921	6.62953e-07	8.0736e-06
TCGA-BLCA	Transcriptome under/over expression	TPMT_OVER	0.647362	446	0.107623	0	170	0.1	0.00362856	0.0135432
TCGA-BLCA	Transcriptome under/over expression	TPMT_OVER	0.707851	446	0.107623	1	150	0.113333	0.00362856	0.0135432
TCGA-BLCA	Transcriptome under/over expression	TPMT_OVER	0.680824	446	0.107623	2	126	0.111111	0.00362856	0.0135432
TCGA-BLCA	Transcriptome under/over expression	TPR_OVER	0.596193	446	0.125561	0	172	0.116279	0.336392	0.506535
TCGA-BLCA	Transcriptome under/over expression	TPR_OVER	0.501089	446	0.125561	1	149	0.120805	0.336392	0.506535
TCGA-BLCA	Transcriptome under/over expression	TPR_OVER	0.605278	446	0.125561	2	125	0.144	0.336392	0.506535
TCGA-BLCA	Transcriptome under/over expression	TYMS_OVER	0.75015	446	0.11435	0	172	0.0988372	2.1564e-06	2.29352e-05
TCGA-BLCA	Transcriptome under/over expression	TYMS_OVER	0.744242	446	0.11435	1	149	0.134228	2.1564e-06	2.29352e-05
TCGA-BLCA	Transcriptome under/over expression	TYMS_OVER	0.614935	446	0.11435	2	125	0.112	2.1564e-06	2.29352e-05
TCGA-BLCA	Transcriptome under/over expression	UBR5_OVER	0.492357	446	0.219731	0	172	0.238372	0.380474	0.553678
TCGA-BLCA	Transcriptome under/over expression	UBR5_OVER	0.496318	446	0.219731	1	149	0.194631	0.380474	0.553678
TCGA-BLCA	Transcriptome under/over expression	UBR5_OVER	0.664435	446	0.219731	2	125	0.224	0.380474	0.553678
TCGA-BLCA	Transcriptome under/over expression	VHL_OVER	0.553157	446	0.147982	0	173	0.190751	0.000165274	0.000988456
TCGA-BLCA	Transcriptome under/over expression	VHL_OVER	0.655963	446	0.147982	1	148	0.108108	0.000165274	0.000988456
TCGA-BLCA	Transcriptome under/over expression	VHL_OVER	0.806134	446	0.147982	2	125	0.136	0.000165274	0.000988456
TCGA-BRCA	Presence of SNV mutations	ABCB1	0.741379	944	0.0116525	0	336	0.0119048	0.866538	0.927514
TCGA-BRCA	Presence of SNV mutations	ABCB1	0.740484	944	0.0116525	1	311	0.0096463	0.866538	0.927514
TCGA-BRCA	Presence of SNV mutations	ABCB1	0.688581	944	0.0116525	2	297	0.013468	0.866538	0.927514
TCGA-BRCA	Presence of SNV mutations	ABL2	0.765571	944	0.0137712	0	335	0.0149254	0.187423	0.324807
TCGA-BRCA	Presence of SNV mutations	ABL2	0.58391	944	0.0137712	1	312	0.0128205	0.187423	0.324807
TCGA-BRCA	Presence of SNV mutations	ABL2	0.738178	944	0.0137712	2	297	0.013468	0.187423	0.324807
TCGA-BRCA	Presence of SNV mutations	AFF1	0.79654	944	0.0137712	0	336	0.014881	0.0128966	0.0383378
TCGA-BRCA	Presence of SNV mutations	AFF1	0.65625	944	0.0137712	1	312	0.0128205	0.0128966	0.0383378
TCGA-BRCA	Presence of SNV mutations	AFF1	0.809028	944	0.0137712	2	296	0.0135135	0.0128966	0.0383378
TCGA-BRCA	Presence of SNV mutations	AFF3	0.573529	944	0.0137712	0	335	0.0149254	0.803671	0.890124
TCGA-BRCA	Presence of SNV mutations	AFF3	0.67128	944	0.0137712	1	313	0.0127796	0.803671	0.890124
TCGA-BRCA	Presence of SNV mutations	AFF3	0.705729	944	0.0137712	2	296	0.0135135	0.803671	0.890124
TCGA-BRCA	Presence of SNV mutations	AKAP9	0.69682	944	0.0349576	0	335	0.0358209	0.0276086	0.0717075
TCGA-BRCA	Presence of SNV mutations	AKAP9	0.749823	944	0.0349576	1	313	0.0383387	0.0276086	0.0717075
TCGA-BRCA	Presence of SNV mutations	AKAP9	0.770711	944	0.0349576	2	296	0.0304054	0.0276086	0.0717075
TCGA-BRCA	Presence of SNV mutations	AKT1	0.660839	944	0.0211864	0	334	0.0209581	0.0112181	0.0345983
TCGA-BRCA	Presence of SNV mutations	AKT1	0.672827	944	0.0211864	1	314	0.022293	0.0112181	0.0345983
TCGA-BRCA	Presence of SNV mutations	AKT1	0.641608	944	0.0211864	2	296	0.0202703	0.0112181	0.0345983
TCGA-BRCA	Presence of SNV mutations	ALK	0.702422	944	0.0137712	0	335	0.0149254	0.525642	0.689509
TCGA-BRCA	Presence of SNV mutations	ALK	0.543403	944	0.0137712	1	313	0.0127796	0.525642	0.689509
TCGA-BRCA	Presence of SNV mutations	ALK	0.782986	944	0.0137712	2	296	0.0135135	0.525642	0.689509
TCGA-BRCA	Presence of SNV mutations	AMER1	0.604167	944	0.0158898	0	335	0.0149254	0.467114	0.640452
TCGA-BRCA	Presence of SNV mutations	AMER1	0.49375	944	0.0158898	1	313	0.0191693	0.467114	0.640452
TCGA-BRCA	Presence of SNV mutations	AMER1	0.569444	944	0.0158898	2	296	0.0135135	0.467114	0.640452
TCGA-BRCA	Presence of SNV mutations	APC	0.641667	944	0.0148305	0	334	0.0149701	0.724819	0.840791
TCGA-BRCA	Presence of SNV mutations	APC	0.591667	944	0.0148305	1	314	0.0159236	0.724819	0.840791
TCGA-BRCA	Presence of SNV mutations	APC	0.696181	944	0.0148305	2	296	0.0135135	0.724819	0.840791
TCGA-BRCA	Presence of SNV mutations	AR	0.621552	944	0.0105932	0	336	0.0119048	0.774775	0.873843
TCGA-BRCA	Presence of SNV mutations	AR	0.638985	944	0.0105932	1	312	0.00961538	0.774775	0.873843
TCGA-BRCA	Presence of SNV mutations	AR	0.448674	944	0.0105932	2	296	0.0101351	0.774775	0.873843
TCGA-BRCA	Presence of SNV mutations	ARID1A	0.550777	944	0.0508475	0	335	0.0537313	0.528667	0.691477
TCGA-BRCA	Presence of SNV mutations	ARID1A	0.603032	944	0.0508475	1	313	0.0511182	0.528667	0.691477
TCGA-BRCA	Presence of SNV mutations	ARID1A	0.631809	944	0.0508475	2	296	0.0472973	0.528667	0.691477
TCGA-BRCA	Presence of SNV mutations	ARID1B	0.659341	944	0.0222458	0	335	0.0208955	0.378242	0.551227
TCGA-BRCA	Presence of SNV mutations	ARID1B	0.592408	944	0.0222458	1	313	0.0255591	0.378242	0.551227
TCGA-BRCA	Presence of SNV mutations	ARID1B	0.581002	944	0.0222458	2	296	0.0202703	0.378242	0.551227
TCGA-BRCA	Presence of SNV mutations	ARID2	0.53125	944	0.0169492	0	335	0.0179104	0.55686	0.71505
TCGA-BRCA	Presence of SNV mutations	ARID2	0.549306	944	0.0169492	1	313	0.0159744	0.55686	0.71505
TCGA-BRCA	Presence of SNV mutations	ARID2	0.633449	944	0.0169492	2	296	0.0168919	0.55686	0.71505
TCGA-BRCA	Presence of SNV mutations	ASXL1	0.800862	944	0.0105932	0	336	0.0119048	0.824056	0.903883
TCGA-BRCA	Presence of SNV mutations	ASXL1	0.56286	944	0.0105932	1	312	0.00961538	0.824056	0.903883
TCGA-BRCA	Presence of SNV mutations	ASXL1	0.625144	944	0.0105932	2	296	0.0101351	0.824056	0.903883
TCGA-BRCA	Presence of SNV mutations	ATM	0.501408	944	0.0307203	0	336	0.0327381	0.828425	0.906947
TCGA-BRCA	Presence of SNV mutations	ATM	0.488025	944	0.0307203	1	312	0.0288462	0.828425	0.906947
TCGA-BRCA	Presence of SNV mutations	ATM	0.510797	944	0.0307203	2	296	0.0304054	0.828425	0.906947
TCGA-BRCA	Presence of SNV mutations	ATP2B3	0.654671	944	0.0158898	0	336	0.0178571	0.752063	0.858643
TCGA-BRCA	Presence of SNV mutations	ATP2B3	0.588542	944	0.0158898	1	312	0.0160256	0.752063	0.858643
TCGA-BRCA	Presence of SNV mutations	ATP2B3	0.565972	944	0.0158898	2	296	0.0135135	0.752063	0.858643
TCGA-BRCA	Presence of SNV mutations	ATR	0.650694	944	0.0148305	0	335	0.0149254	0.565368	0.72143
TCGA-BRCA	Presence of SNV mutations	ATR	0.716667	944	0.0148305	1	313	0.0159744	0.565368	0.72143
TCGA-BRCA	Presence of SNV mutations	ATR	0.758681	944	0.0148305	2	296	0.0135135	0.565368	0.72143
TCGA-BRCA	Presence of SNV mutations	ATRX	0.764228	944	0.0190678	0	334	0.0179641	0.00100078	0.00449737
TCGA-BRCA	Presence of SNV mutations	ATRX	0.698606	944	0.0190678	1	316	0.0221519	0.00100078	0.00449737
TCGA-BRCA	Presence of SNV mutations	ATRX	0.590244	944	0.0190678	2	294	0.0170068	0.00100078	0.00449737
TCGA-BRCA	Presence of SNV mutations	BAP1	0.826298	944	0.0137712	0	335	0.0149254	0.0643607	0.140313
TCGA-BRCA	Presence of SNV mutations	BAP1	0.670139	944	0.0137712	1	313	0.0127796	0.0643607	0.140313
TCGA-BRCA	Presence of SNV mutations	BAP1	0.769097	944	0.0137712	2	296	0.0135135	0.0643607	0.140313
TCGA-BRCA	Presence of SNV mutations	BCL9	0.802768	944	0.0137712	0	336	0.014881	0.74104	0.852029
TCGA-BRCA	Presence of SNV mutations	BCL9	0.693576	944	0.0137712	1	312	0.0128205	0.74104	0.852029
TCGA-BRCA	Presence of SNV mutations	BCL9	0.625868	944	0.0137712	2	296	0.0135135	0.74104	0.852029
TCGA-BRCA	Presence of SNV mutations	BCOR	0.709343	944	0.0148305	0	336	0.014881	0.0665443	0.144448
TCGA-BRCA	Presence of SNV mutations	BCOR	0.59375	944	0.0148305	1	312	0.0160256	0.0665443	0.144448
TCGA-BRCA	Presence of SNV mutations	BCOR	0.622396	944	0.0148305	2	296	0.0135135	0.0665443	0.144448
TCGA-BRCA	Presence of SNV mutations	BCR	0.639273	944	0.0158898	0	335	0.0179104	0.228543	0.380056
TCGA-BRCA	Presence of SNV mutations	BCR	0.371972	944	0.0158898	1	312	0.0128205	0.228543	0.380056
TCGA-BRCA	Presence of SNV mutations	BCR	0.595486	944	0.0158898	2	297	0.016835	0.228543	0.380056
TCGA-BRCA	Presence of SNV mutations	BLM	0.636678	944	0.0148305	0	336	0.014881	0.488958	0.659856
TCGA-BRCA	Presence of SNV mutations	BLM	0.657986	944	0.0148305	1	312	0.0160256	0.488958	0.659856
TCGA-BRCA	Presence of SNV mutations	BLM	0.605903	944	0.0148305	2	296	0.0135135	0.488958	0.659856
TCGA-BRCA	Presence of SNV mutations	BRCA1	0.772438	944	0.0338983	0	334	0.0329341	0.000760727	0.00364624
TCGA-BRCA	Presence of SNV mutations	BRCA1	0.676325	944	0.0338983	1	314	0.0382166	0.000760727	0.00364624
TCGA-BRCA	Presence of SNV mutations	BRCA1	0.657244	944	0.0338983	2	296	0.0304054	0.000760727	0.00364624
TCGA-BRCA	Presence of SNV mutations	BRCA2	0.660827	944	0.0413136	0	335	0.038806	0.0865129	0.177653
TCGA-BRCA	Presence of SNV mutations	BRCA2	0.619048	944	0.0413136	1	313	0.0447284	0.0865129	0.177653
TCGA-BRCA	Presence of SNV mutations	BRCA2	0.696131	944	0.0413136	2	296	0.0405405	0.0865129	0.177653
TCGA-BRCA	Presence of SNV mutations	BRIP1	0.704498	944	0.0137712	0	336	0.014881	0.982287	0.990925
TCGA-BRCA	Presence of SNV mutations	BRIP1	0.679688	944	0.0137712	1	312	0.0128205	0.982287	0.990925
TCGA-BRCA	Presence of SNV mutations	BRIP1	0.643229	944	0.0137712	2	296	0.0135135	0.982287	0.990925
TCGA-BRCA	Presence of SNV mutations	CACNA1D	0.485417	944	0.0169492	0	334	0.0149701	0.419365	0.594396
TCGA-BRCA	Presence of SNV mutations	CACNA1D	0.465972	944	0.0169492	1	314	0.022293	0.419365	0.594396
TCGA-BRCA	Presence of SNV mutations	CACNA1D	0.394097	944	0.0169492	2	296	0.0135135	0.419365	0.594396
TCGA-BRCA	Presence of SNV mutations	CARD11	0.695502	944	0.0116525	0	335	0.0119403	0.001081	0.00480959
TCGA-BRCA	Presence of SNV mutations	CARD11	0.791522	944	0.0116525	1	313	0.0127796	0.001081	0.00480959
TCGA-BRCA	Presence of SNV mutations	CARD11	0.770473	944	0.0116525	2	296	0.0101351	0.001081	0.00480959
TCGA-BRCA	Presence of SNV mutations	CASP8	0.64518	944	0.0201271	0	335	0.0208955	0.0535766	0.121126
TCGA-BRCA	Presence of SNV mutations	CASP8	0.744483	944	0.0201271	1	313	0.0223642	0.0535766	0.121126
TCGA-BRCA	Presence of SNV mutations	CASP8	0.698955	944	0.0201271	2	296	0.0168919	0.0535766	0.121126
TCGA-BRCA	Presence of SNV mutations	CBFB	0.719298	944	0.0254237	0	334	0.0269461	0.519739	0.685558
TCGA-BRCA	Presence of SNV mutations	CBFB	0.742544	944	0.0254237	1	314	0.0254777	0.519739	0.685558
TCGA-BRCA	Presence of SNV mutations	CBFB	0.683709	944	0.0254237	2	296	0.0236486	0.519739	0.685558
TCGA-BRCA	Presence of SNV mutations	CBLB	0.478374	944	0.0127119	0	335	0.0149254	0.983304	0.990925
TCGA-BRCA	Presence of SNV mutations	CBLB	0.652249	944	0.0127119	1	313	0.0127796	0.983304	0.990925
TCGA-BRCA	Presence of SNV mutations	CBLB	0.813149	944	0.0127119	2	296	0.0101351	0.983304	0.990925
TCGA-BRCA	Presence of SNV mutations	CDH1	0.820542	944	0.15678	0	334	0.155689	1.20153e-48	4.84336e-46
TCGA-BRCA	Presence of SNV mutations	CDH1	0.879071	944	0.15678	1	314	0.156051	1.20153e-48	4.84336e-46
TCGA-BRCA	Presence of SNV mutations	CDH1	0.817869	944	0.15678	2	296	0.158784	1.20153e-48	4.84336e-46
TCGA-BRCA	Presence of SNV mutations	CDK12	0.609175	944	0.0190678	0	334	0.0179641	0.879088	0.933374
TCGA-BRCA	Presence of SNV mutations	CDK12	0.734611	944	0.0190678	1	314	0.022293	0.879088	0.933374
TCGA-BRCA	Presence of SNV mutations	CDK12	0.747038	944	0.0190678	2	296	0.0168919	0.879088	0.933374
TCGA-BRCA	Presence of SNV mutations	CDKN1B	0.67301	944	0.0137712	0	335	0.0149254	0.0385176	0.0938476
TCGA-BRCA	Presence of SNV mutations	CDKN1B	0.576125	944	0.0137712	1	313	0.0127796	0.0385176	0.0938476
TCGA-BRCA	Presence of SNV mutations	CDKN1B	0.739583	944	0.0137712	2	296	0.0135135	0.0385176	0.0938476
TCGA-BRCA	Presence of SNV mutations	CHD1	0.561419	944	0.0127119	0	335	0.0119403	0.731171	0.845482
TCGA-BRCA	Presence of SNV mutations	CHD1	0.572664	944	0.0127119	1	312	0.0128205	0.731171	0.845482
TCGA-BRCA	Presence of SNV mutations	CHD1	0.622837	944	0.0127119	2	297	0.013468	0.731171	0.845482
TCGA-BRCA	Presence of SNV mutations	CLTC	0.728374	944	0.0127119	0	334	0.011976	0.867445	0.928237
TCGA-BRCA	Presence of SNV mutations	CLTC	0.820934	944	0.0127119	1	314	0.0159236	0.867445	0.928237
TCGA-BRCA	Presence of SNV mutations	CLTC	0.746251	944	0.0127119	2	296	0.0101351	0.867445	0.928237
TCGA-BRCA	Presence of SNV mutations	CNOT3	0.885813	944	0.0127119	0	335	0.0119403	0.0151308	0.0440696
TCGA-BRCA	Presence of SNV mutations	CNOT3	0.511246	944	0.0127119	1	312	0.0128205	0.0151308	0.0440696
TCGA-BRCA	Presence of SNV mutations	CNOT3	0.710496	944	0.0127119	2	297	0.013468	0.0151308	0.0440696
TCGA-BRCA	Presence of SNV mutations	CNTRL	0.503472	944	0.0190678	0	336	0.0208333	0.769933	0.871309
TCGA-BRCA	Presence of SNV mutations	CNTRL	0.572822	944	0.0190678	1	312	0.0192308	0.769933	0.871309
TCGA-BRCA	Presence of SNV mutations	CNTRL	0.543554	944	0.0190678	2	296	0.0168919	0.769933	0.871309
TCGA-BRCA	Presence of SNV mutations	COL1A1	0.435986	944	0.0127119	0	334	0.011976	0.348375	0.519919
TCGA-BRCA	Presence of SNV mutations	COL1A1	0.615917	944	0.0127119	1	314	0.0159236	0.348375	0.519919
TCGA-BRCA	Presence of SNV mutations	COL1A1	0.641292	944	0.0127119	2	296	0.0101351	0.348375	0.519919
TCGA-BRCA	Presence of SNV mutations	CREBBP	0.587912	944	0.0233051	0	335	0.0208955	0.0280343	0.0726262
TCGA-BRCA	Presence of SNV mutations	CREBBP	0.618881	944	0.0233051	1	313	0.0255591	0.0280343	0.0726262
TCGA-BRCA	Presence of SNV mutations	CREBBP	0.677156	944	0.0233051	2	296	0.0236486	0.0280343	0.0726262
TCGA-BRCA	Presence of SNV mutations	CUX1	0.58737	944	0.0137712	0	335	0.0179104	0.49599	0.666001
TCGA-BRCA	Presence of SNV mutations	CUX1	0.58564	944	0.0137712	1	313	0.0127796	0.49599	0.666001
TCGA-BRCA	Presence of SNV mutations	CUX1	0.659746	944	0.0137712	2	296	0.0101351	0.49599	0.666001
TCGA-BRCA	Presence of SNV mutations	DICER1	0.789655	944	0.0116525	0	336	0.014881	0.437554	0.612079
TCGA-BRCA	Presence of SNV mutations	DICER1	0.405998	944	0.0116525	1	312	0.00961538	0.437554	0.612079
TCGA-BRCA	Presence of SNV mutations	DICER1	0.818916	944	0.0116525	2	296	0.0101351	0.437554	0.612079
TCGA-BRCA	Presence of SNV mutations	EGFR	0.644983	944	0.0148305	0	335	0.0179104	0.682815	0.811549
TCGA-BRCA	Presence of SNV mutations	EGFR	0.760417	944	0.0148305	1	313	0.0127796	0.682815	0.811549
TCGA-BRCA	Presence of SNV mutations	EGFR	0.453125	944	0.0148305	2	296	0.0135135	0.682815	0.811549
TCGA-BRCA	Presence of SNV mutations	EIF4A2	0.620833	944	0.0180085	0	335	0.0179104	0.00191848	0.00795619
TCGA-BRCA	Presence of SNV mutations	EIF4A2	0.824306	944	0.0180085	1	313	0.0191693	0.00191848	0.00795619
TCGA-BRCA	Presence of SNV mutations	EIF4A2	0.692683	944	0.0180085	2	296	0.0168919	0.00191848	0.00795619
TCGA-BRCA	Presence of SNV mutations	ELN	0.711207	944	0.0116525	0	335	0.0119403	0.822872	0.902829
TCGA-BRCA	Presence of SNV mutations	ELN	0.773933	944	0.0116525	1	313	0.0127796	0.822872	0.902829
TCGA-BRCA	Presence of SNV mutations	ELN	0.484429	944	0.0116525	2	296	0.0101351	0.822872	0.902829
TCGA-BRCA	Presence of SNV mutations	EP300	0.574332	944	0.0211864	0	335	0.0238806	0.236142	0.389479
TCGA-BRCA	Presence of SNV mutations	EP300	0.634727	944	0.0211864	1	313	0.0223642	0.236142	0.389479
TCGA-BRCA	Presence of SNV mutations	EP300	0.76446	944	0.0211864	2	296	0.0168919	0.236142	0.389479
TCGA-BRCA	Presence of SNV mutations	ERBB2	0.635211	944	0.0307203	0	336	0.0297619	0.0192475	0.0536933
TCGA-BRCA	Presence of SNV mutations	ERBB2	0.753828	944	0.0307203	1	311	0.0289389	0.0192475	0.0536933
TCGA-BRCA	Presence of SNV mutations	ERBB2	0.690616	944	0.0307203	2	297	0.03367	0.0192475	0.0536933
TCGA-BRCA	Presence of SNV mutations	ERBB3	0.701798	944	0.0222458	0	334	0.0209581	0.165599	0.293937
TCGA-BRCA	Presence of SNV mutations	ERBB3	0.558442	944	0.0222458	1	314	0.022293	0.165599	0.293937
TCGA-BRCA	Presence of SNV mutations	ERBB3	0.479699	944	0.0222458	2	296	0.0236486	0.165599	0.293937
TCGA-BRCA	Presence of SNV mutations	FANCA	0.751557	944	0.0148305	0	336	0.0178571	0.781207	0.87815
TCGA-BRCA	Presence of SNV mutations	FANCA	0.522569	944	0.0148305	1	312	0.0128205	0.781207	0.87815
TCGA-BRCA	Presence of SNV mutations	FANCA	0.578993	944	0.0148305	2	296	0.0135135	0.781207	0.87815
TCGA-BRCA	Presence of SNV mutations	FANCD2	0.735417	944	0.0158898	0	335	0.0179104	0.413437	0.590562
TCGA-BRCA	Presence of SNV mutations	FANCD2	0.74375	944	0.0158898	1	313	0.0159744	0.413437	0.590562
TCGA-BRCA	Presence of SNV mutations	FANCD2	0.732639	944	0.0158898	2	296	0.0135135	0.413437	0.590562
TCGA-BRCA	Presence of SNV mutations	FBXW7	0.66782	944	0.0137712	0	336	0.014881	0.324431	0.492572
TCGA-BRCA	Presence of SNV mutations	FBXW7	0.653646	944	0.0137712	1	312	0.0128205	0.324431	0.492572
TCGA-BRCA	Presence of SNV mutations	FBXW7	0.577257	944	0.0137712	2	296	0.0135135	0.324431	0.492572
TCGA-BRCA	Presence of SNV mutations	FGFR2	0.56263	944	0.0158898	0	336	0.014881	0.955214	0.97579
TCGA-BRCA	Presence of SNV mutations	FGFR2	0.497396	944	0.0158898	1	310	0.0129032	0.955214	0.97579
TCGA-BRCA	Presence of SNV mutations	FGFR2	0.402778	944	0.0158898	2	298	0.0201342	0.955214	0.97579
TCGA-BRCA	Presence of SNV mutations	FOXA1	0.70922	944	0.0402542	0	334	0.0508982	0.136838	0.254543
TCGA-BRCA	Presence of SNV mutations	FOXA1	0.57608	944	0.0402542	1	314	0.0350318	0.136838	0.254543
TCGA-BRCA	Presence of SNV mutations	FOXA1	0.578014	944	0.0402542	2	296	0.0337838	0.136838	0.254543
TCGA-BRCA	Presence of SNV mutations	GATA3	0.617504	944	0.122881	0	335	0.122388	0.000105938	0.000676763
TCGA-BRCA	Presence of SNV mutations	GATA3	0.577703	944	0.122881	1	313	0.118211	0.000105938	0.000676763
TCGA-BRCA	Presence of SNV mutations	GATA3	0.675239	944	0.122881	2	296	0.128378	0.000105938	0.000676763
TCGA-BRCA	Presence of SNV mutations	GNAS	0.805172	944	0.0105932	0	336	0.0119048	0.1728	0.303908
TCGA-BRCA	Presence of SNV mutations	GNAS	0.930796	944	0.0105932	1	312	0.00961538	0.1728	0.303908
TCGA-BRCA	Presence of SNV mutations	GNAS	0.93887	944	0.0105932	2	296	0.0101351	0.1728	0.303908
TCGA-BRCA	Presence of SNV mutations	GRIN2A	0.735526	944	0.0275424	0	335	0.0268657	7.2085e-05	0.000492499
TCGA-BRCA	Presence of SNV mutations	GRIN2A	0.627193	944	0.0275424	1	313	0.028754	7.2085e-05	0.000492499
TCGA-BRCA	Presence of SNV mutations	GRIN2A	0.538847	944	0.0275424	2	296	0.027027	7.2085e-05	0.000492499
TCGA-BRCA	Presence of SNV mutations	JAK1	0.780172	944	0.0148305	0	335	0.0149254	0.541881	0.702806
TCGA-BRCA	Presence of SNV mutations	JAK1	0.747405	944	0.0148305	1	313	0.0159744	0.541881	0.702806
TCGA-BRCA	Presence of SNV mutations	JAK1	0.61361	944	0.0148305	2	296	0.0135135	0.541881	0.702806
TCGA-BRCA	Presence of SNV mutations	JAK3	0.537024	944	0.0158898	0	336	0.0178571	0.827164	0.906137
TCGA-BRCA	Presence of SNV mutations	JAK3	0.576389	944	0.0158898	1	311	0.0128617	0.827164	0.906137
TCGA-BRCA	Presence of SNV mutations	JAK3	0.524306	944	0.0158898	2	297	0.016835	0.827164	0.906137
TCGA-BRCA	Presence of SNV mutations	KAT6A	0.653979	944	0.0148305	0	336	0.014881	0.0084957	0.0275995
TCGA-BRCA	Presence of SNV mutations	KAT6A	0.565104	944	0.0148305	1	312	0.0160256	0.0084957	0.0275995
TCGA-BRCA	Presence of SNV mutations	KAT6A	0.463542	944	0.0148305	2	296	0.0135135	0.0084957	0.0275995
TCGA-BRCA	Presence of SNV mutations	KAT6B	0.39693	944	0.0254237	0	334	0.0239521	0.371598	0.545479
TCGA-BRCA	Presence of SNV mutations	KAT6B	0.519298	944	0.0254237	1	314	0.0286624	0.371598	0.545479
TCGA-BRCA	Presence of SNV mutations	KAT6B	0.584962	944	0.0254237	2	296	0.0236486	0.371598	0.545479
TCGA-BRCA	Presence of SNV mutations	KDM5A	0.527586	944	0.0105932	0	336	0.0119048	0.869277	0.928719
TCGA-BRCA	Presence of SNV mutations	KDM5A	0.767013	944	0.0105932	1	312	0.00961538	0.869277	0.928719
TCGA-BRCA	Presence of SNV mutations	KDM5A	0.712803	944	0.0105932	2	296	0.0101351	0.869277	0.928719
TCGA-BRCA	Presence of SNV mutations	KDM6A	0.556943	944	0.0211864	0	335	0.0208955	0.746225	0.855041
TCGA-BRCA	Presence of SNV mutations	KDM6A	0.686314	944	0.0211864	1	313	0.0223642	0.746225	0.855041
TCGA-BRCA	Presence of SNV mutations	KDM6A	0.643357	944	0.0211864	2	296	0.0202703	0.746225	0.855041
TCGA-BRCA	Presence of SNV mutations	KIF5B	0.57872	944	0.0137712	0	334	0.0149701	0.69625	0.820159
TCGA-BRCA	Presence of SNV mutations	KIF5B	0.6609	944	0.0137712	1	314	0.0127389	0.69625	0.820159
TCGA-BRCA	Presence of SNV mutations	KIF5B	0.719723	944	0.0137712	2	296	0.0135135	0.69625	0.820159
TCGA-BRCA	Presence of SNV mutations	KMT2A	0.52048	944	0.0222458	0	335	0.0208955	0.308126	0.474067
TCGA-BRCA	Presence of SNV mutations	KMT2A	0.678821	944	0.0222458	1	313	0.0223642	0.308126	0.474067
TCGA-BRCA	Presence of SNV mutations	KMT2A	0.410839	944	0.0222458	2	296	0.0236486	0.308126	0.474067
TCGA-BRCA	Presence of SNV mutations	KMT2C	0.542172	944	0.100636	0	335	0.0985075	0.935761	0.964226
TCGA-BRCA	Presence of SNV mutations	KMT2C	0.533631	944	0.100636	1	313	0.105431	0.935761	0.964226
TCGA-BRCA	Presence of SNV mutations	KMT2C	0.470172	944	0.100636	2	296	0.097973	0.935761	0.964226
TCGA-BRCA	Presence of SNV mutations	KMT2D	0.600177	944	0.0370763	0	336	0.0357143	0.0967446	0.194989
TCGA-BRCA	Presence of SNV mutations	KMT2D	0.6066	944	0.0370763	1	311	0.0353698	0.0967446	0.194989
TCGA-BRCA	Presence of SNV mutations	KMT2D	0.609511	944	0.0370763	2	297	0.040404	0.0967446	0.194989
TCGA-BRCA	Presence of SNV mutations	LIFR	0.505172	944	0.0105932	0	336	0.0119048	0.711179	0.831155
TCGA-BRCA	Presence of SNV mutations	LIFR	0.713956	944	0.0105932	1	312	0.00961538	0.711179	0.831155
TCGA-BRCA	Presence of SNV mutations	LIFR	0.522491	944	0.0105932	2	296	0.0101351	0.711179	0.831155
TCGA-BRCA	Presence of SNV mutations	LPP	0.390517	944	0.0116525	0	336	0.0119048	0.523175	0.68784
TCGA-BRCA	Presence of SNV mutations	LPP	0.589389	944	0.0116525	1	311	0.0096463	0.523175	0.68784
TCGA-BRCA	Presence of SNV mutations	LPP	0.478662	944	0.0116525	2	297	0.013468	0.523175	0.68784
TCGA-BRCA	Presence of SNV mutations	MAP2K4	0.593676	944	0.0381356	0	336	0.0386905	0.771999	0.872324
TCGA-BRCA	Presence of SNV mutations	MAP2K4	0.639275	944	0.0381356	1	312	0.0352564	0.771999	0.872324
TCGA-BRCA	Presence of SNV mutations	MAP2K4	0.572954	944	0.0381356	2	296	0.0405405	0.771999	0.872324
TCGA-BRCA	Presence of SNV mutations	MAP3K1	0.611272	944	0.0826271	0	334	0.0898204	0.0378924	0.0928566
TCGA-BRCA	Presence of SNV mutations	MAP3K1	0.637842	944	0.0826271	1	314	0.0796178	0.0378924	0.0928566
TCGA-BRCA	Presence of SNV mutations	MAP3K1	0.475028	944	0.0826271	2	296	0.0777027	0.0378924	0.0928566
TCGA-BRCA	Presence of SNV mutations	MECOM	0.547414	944	0.0116525	0	336	0.0119048	0.669741	0.805295
TCGA-BRCA	Presence of SNV mutations	MECOM	0.588235	944	0.0116525	1	311	0.0096463	0.669741	0.805295
TCGA-BRCA	Presence of SNV mutations	MECOM	0.735871	944	0.0116525	2	297	0.013468	0.669741	0.805295
TCGA-BRCA	Presence of SNV mutations	MED12	0.495305	944	0.029661	0	335	0.0298507	0.709829	0.830331
TCGA-BRCA	Presence of SNV mutations	MED12	0.549296	944	0.029661	1	313	0.0319489	0.709829	0.830331
TCGA-BRCA	Presence of SNV mutations	MED12	0.440581	944	0.029661	2	296	0.027027	0.709829	0.830331
TCGA-BRCA	Presence of SNV mutations	MEN1	0.756034	944	0.0105932	0	336	0.0119048	0.734543	0.848
TCGA-BRCA	Presence of SNV mutations	MEN1	0.875433	944	0.0105932	1	312	0.00961538	0.734543	0.848
TCGA-BRCA	Presence of SNV mutations	MEN1	0.716263	944	0.0105932	2	296	0.0101351	0.734543	0.848
TCGA-BRCA	Presence of SNV mutations	MET	0.497405	944	0.0127119	0	335	0.0119403	0.603887	0.754579
TCGA-BRCA	Presence of SNV mutations	MET	0.439446	944	0.0127119	1	313	0.0127796	0.603887	0.754579
TCGA-BRCA	Presence of SNV mutations	MET	0.688368	944	0.0127119	2	296	0.0135135	0.603887	0.754579
TCGA-BRCA	Presence of SNV mutations	MLLT10	0.658304	944	0.0137712	0	335	0.0119403	0.0193026	0.0538096
TCGA-BRCA	Presence of SNV mutations	MLLT10	0.640138	944	0.0137712	1	313	0.0159744	0.0193026	0.0538096
TCGA-BRCA	Presence of SNV mutations	MLLT10	0.666667	944	0.0137712	2	296	0.0135135	0.0193026	0.0538096
TCGA-BRCA	Presence of SNV mutations	MSH6	0.560345	944	0.0116525	0	336	0.0119048	0.660109	0.799549
TCGA-BRCA	Presence of SNV mutations	MSH6	0.642445	944	0.0116525	1	312	0.0128205	0.660109	0.799549
TCGA-BRCA	Presence of SNV mutations	MSH6	0.425606	944	0.0116525	2	296	0.0101351	0.660109	0.799549
TCGA-BRCA	Presence of SNV mutations	MTOR	0.643357	944	0.0264831	0	336	0.0297619	0.119167	0.230168
TCGA-BRCA	Presence of SNV mutations	MTOR	0.625564	944	0.0264831	1	311	0.022508	0.119167	0.230168
TCGA-BRCA	Presence of SNV mutations	MTOR	0.596491	944	0.0264831	2	297	0.026936	0.119167	0.230168
TCGA-BRCA	Presence of SNV mutations	MYB	0.759516	944	0.0116525	0	334	0.011976	2.20417e-11	6.39209e-10
TCGA-BRCA	Presence of SNV mutations	MYB	0.797578	944	0.0116525	1	314	0.0127389	2.20417e-11	6.39209e-10
TCGA-BRCA	Presence of SNV mutations	MYB	0.673587	944	0.0116525	2	296	0.0101351	2.20417e-11	6.39209e-10
TCGA-BRCA	Presence of SNV mutations	MYH11	0.610381	944	0.0169492	0	336	0.014881	1.88261e-08	3.07239e-07
TCGA-BRCA	Presence of SNV mutations	MYH11	0.84809	944	0.0169492	1	312	0.0192308	1.88261e-08	3.07239e-07
TCGA-BRCA	Presence of SNV mutations	MYH11	0.954861	944	0.0169492	2	296	0.0168919	1.88261e-08	3.07239e-07
TCGA-BRCA	Presence of SNV mutations	MYH9	0.577423	944	0.0381356	0	336	0.0386905	0.00980974	0.0310629
TCGA-BRCA	Presence of SNV mutations	MYH9	0.692009	944	0.0381356	1	312	0.0384615	0.00980974	0.0310629
TCGA-BRCA	Presence of SNV mutations	MYH9	0.748949	944	0.0381356	2	296	0.0371622	0.00980974	0.0310629
TCGA-BRCA	Presence of SNV mutations	MYO5A	0.6	944	0.0116525	0	336	0.0119048	0.757762	0.861647
TCGA-BRCA	Presence of SNV mutations	MYO5A	0.705882	944	0.0116525	1	311	0.0096463	0.757762	0.861647
TCGA-BRCA	Presence of SNV mutations	MYO5A	0.737024	944	0.0116525	2	297	0.013468	0.757762	0.861647
TCGA-BRCA	Presence of SNV mutations	NCOR1	0.537004	944	0.0540254	0	335	0.0507463	0.662265	0.801678
TCGA-BRCA	Presence of SNV mutations	NCOR1	0.630415	944	0.0540254	1	313	0.0543131	0.662265	0.801678
TCGA-BRCA	Presence of SNV mutations	NCOR1	0.505888	944	0.0540254	2	296	0.0574324	0.662265	0.801678
TCGA-BRCA	Presence of SNV mutations	NF1	0.517308	944	0.0444915	0	334	0.0389222	0.164635	0.29287
TCGA-BRCA	Presence of SNV mutations	NF1	0.509066	944	0.0444915	1	314	0.0509554	0.164635	0.29287
TCGA-BRCA	Presence of SNV mutations	NF1	0.688723	944	0.0444915	2	296	0.0439189	0.164635	0.29287
TCGA-BRCA	Presence of SNV mutations	NIN	0.496516	944	0.0233051	0	334	0.0209581	0.37445	0.547482
TCGA-BRCA	Presence of SNV mutations	NIN	0.498258	944	0.0233051	1	313	0.0255591	0.37445	0.547482
TCGA-BRCA	Presence of SNV mutations	NIN	0.763986	944	0.0233051	2	297	0.023569	0.37445	0.547482
TCGA-BRCA	Presence of SNV mutations	NOTCH1	0.502595	944	0.0127119	0	334	0.011976	0.864189	0.92686
TCGA-BRCA	Presence of SNV mutations	NOTCH1	0.717993	944	0.0127119	1	314	0.0159236	0.864189	0.92686
TCGA-BRCA	Presence of SNV mutations	NOTCH1	0.798155	944	0.0127119	2	296	0.0101351	0.864189	0.92686
TCGA-BRCA	Presence of SNV mutations	NOTCH2	0.502257	944	0.0391949	0	334	0.0389222	0.738347	0.850735
TCGA-BRCA	Presence of SNV mutations	NOTCH2	0.593488	944	0.0391949	1	314	0.044586	0.738347	0.850735
TCGA-BRCA	Presence of SNV mutations	NOTCH2	0.545035	944	0.0391949	2	296	0.0337838	0.738347	0.850735
TCGA-BRCA	Presence of SNV mutations	NOTCH3	0.737889	944	0.0127119	0	334	0.011976	0.147555	0.269994
TCGA-BRCA	Presence of SNV mutations	NOTCH3	0.749135	944	0.0127119	1	314	0.0159236	0.147555	0.269994
TCGA-BRCA	Presence of SNV mutations	NOTCH3	0.797001	944	0.0127119	2	296	0.0101351	0.147555	0.269994
TCGA-BRCA	Presence of SNV mutations	NSD1	0.570069	944	0.0116525	0	335	0.0119403	0.723114	0.839537
TCGA-BRCA	Presence of SNV mutations	NSD1	0.735294	944	0.0116525	1	313	0.0127796	0.723114	0.839537
TCGA-BRCA	Presence of SNV mutations	NSD1	0.747405	944	0.0116525	2	296	0.0101351	0.723114	0.839537
TCGA-BRCA	Presence of SNV mutations	NUMA1	0.680172	944	0.0116525	0	336	0.0119048	0.767186	0.868687
TCGA-BRCA	Presence of SNV mutations	NUMA1	0.577855	944	0.0116525	1	312	0.00961538	0.767186	0.868687
TCGA-BRCA	Presence of SNV mutations	NUMA1	0.600923	944	0.0116525	2	296	0.0135135	0.767186	0.868687
TCGA-BRCA	Presence of SNV mutations	NUP214	0.455172	944	0.0116525	0	336	0.0119048	0.215685	0.362866
TCGA-BRCA	Presence of SNV mutations	NUP214	0.737024	944	0.0116525	1	312	0.0128205	0.215685	0.362866
TCGA-BRCA	Presence of SNV mutations	NUP214	0.709343	944	0.0116525	2	296	0.0101351	0.215685	0.362866
TCGA-BRCA	Presence of SNV mutations	NUP98	0.644828	944	0.0105932	0	336	0.0119048	4.16595e-06	4.13619e-05
TCGA-BRCA	Presence of SNV mutations	NUP98	0.806228	944	0.0105932	1	312	0.00961538	4.16595e-06	4.13619e-05
TCGA-BRCA	Presence of SNV mutations	NUP98	0.929642	944	0.0105932	2	296	0.0101351	4.16595e-06	4.13619e-05
TCGA-BRCA	Presence of SNV mutations	PDE4DIP	0.631119	944	0.0243644	0	336	0.0267857	0.976796	0.98943
TCGA-BRCA	Presence of SNV mutations	PDE4DIP	0.653634	944	0.0243644	1	312	0.0224359	0.976796	0.98943
TCGA-BRCA	Presence of SNV mutations	PDE4DIP	0.62807	944	0.0243644	2	296	0.0236486	0.976796	0.98943
TCGA-BRCA	Presence of SNV mutations	PIK3CA	0.624948	944	0.348517	0	335	0.355224	6.86944e-09	1.26442e-07
TCGA-BRCA	Presence of SNV mutations	PIK3CA	0.611541	944	0.348517	1	314	0.343949	6.86944e-09	1.26442e-07
TCGA-BRCA	Presence of SNV mutations	PIK3CA	0.62901	944	0.348517	2	295	0.345763	6.86944e-09	1.26442e-07
TCGA-BRCA	Presence of SNV mutations	PIK3R1	0.536972	944	0.0307203	0	336	0.0297619	0.881766	0.934365
TCGA-BRCA	Presence of SNV mutations	PIK3R1	0.630546	944	0.0307203	1	312	0.0320513	0.881766	0.934365
TCGA-BRCA	Presence of SNV mutations	PIK3R1	0.641539	944	0.0307203	2	296	0.0304054	0.881766	0.934365
TCGA-BRCA	Presence of SNV mutations	PMS1	0.536207	944	0.0105932	0	335	0.0119403	0.834924	0.9106
TCGA-BRCA	Presence of SNV mutations	PMS1	0.327566	944	0.0105932	1	313	0.00958466	0.834924	0.9106
TCGA-BRCA	Presence of SNV mutations	PMS1	0.6609	944	0.0105932	2	296	0.0101351	0.834924	0.9106
TCGA-BRCA	Presence of SNV mutations	POLE	0.575494	944	0.0190678	0	335	0.0179104	0.300986	0.466824
TCGA-BRCA	Presence of SNV mutations	POLE	0.790941	944	0.0190678	1	313	0.0223642	0.300986	0.466824
TCGA-BRCA	Presence of SNV mutations	POLE	0.700348	944	0.0190678	2	296	0.0168919	0.300986	0.466824
TCGA-BRCA	Presence of SNV mutations	PRDM1	0.461073	944	0.0127119	0	335	0.0119403	0.861766	0.925184
TCGA-BRCA	Presence of SNV mutations	PRDM1	0.363322	944	0.0127119	1	313	0.0159744	0.861766	0.925184
TCGA-BRCA	Presence of SNV mutations	PRDM1	0.508651	944	0.0127119	2	296	0.0101351	0.861766	0.925184
TCGA-BRCA	Presence of SNV mutations	PTCH1	0.600346	944	0.0127119	0	335	0.0119403	0.921948	0.956282
TCGA-BRCA	Presence of SNV mutations	PTCH1	0.464533	944	0.0127119	1	313	0.0127796	0.921948	0.956282
TCGA-BRCA	Presence of SNV mutations	PTCH1	0.399306	944	0.0127119	2	296	0.0135135	0.921948	0.956282
TCGA-BRCA	Presence of SNV mutations	PTEN	0.486465	944	0.059322	0	335	0.0567164	0.743177	0.852518
TCGA-BRCA	Presence of SNV mutations	PTEN	0.49899	944	0.059322	1	313	0.0638978	0.743177	0.852518
TCGA-BRCA	Presence of SNV mutations	PTEN	0.614118	944	0.059322	2	296	0.0574324	0.743177	0.852518
TCGA-BRCA	Presence of SNV mutations	PTPRB	0.644019	944	0.0201271	0	335	0.0208955	0.998279	0.998527
TCGA-BRCA	Presence of SNV mutations	PTPRB	0.587108	944	0.0201271	1	313	0.0223642	0.998279	0.998527
TCGA-BRCA	Presence of SNV mutations	PTPRB	0.459233	944	0.0201271	2	296	0.0168919	0.998279	0.998527
TCGA-BRCA	Presence of SNV mutations	RANBP2	0.381119	944	0.0264831	0	336	0.0267857	0.456035	0.629763
TCGA-BRCA	Presence of SNV mutations	RANBP2	0.475188	944	0.0264831	1	311	0.0257235	0.456035	0.629763
TCGA-BRCA	Presence of SNV mutations	RANBP2	0.674185	944	0.0264831	2	297	0.026936	0.456035	0.629763
TCGA-BRCA	Presence of SNV mutations	RB1	0.686228	944	0.0275424	0	335	0.0268657	0.251909	0.408301
TCGA-BRCA	Presence of SNV mutations	RB1	0.697183	944	0.0275424	1	313	0.028754	0.251909	0.408301
TCGA-BRCA	Presence of SNV mutations	RB1	0.710387	944	0.0275424	2	296	0.027027	0.251909	0.408301
TCGA-BRCA	Presence of SNV mutations	RET	0.685813	944	0.0169492	0	336	0.0178571	2.0012e-09	4.1797e-08
TCGA-BRCA	Presence of SNV mutations	RET	0.796875	944	0.0169492	1	312	0.0192308	2.0012e-09	4.1797e-08
TCGA-BRCA	Presence of SNV mutations	RET	0.75	944	0.0169492	2	296	0.0135135	2.0012e-09	4.1797e-08
TCGA-BRCA	Presence of SNV mutations	RNF213	0.620623	944	0.0370763	0	337	0.0445104	0.61982	0.768043
TCGA-BRCA	Presence of SNV mutations	RNF213	0.537589	944	0.0370763	1	311	0.0321543	0.61982	0.768043
TCGA-BRCA	Presence of SNV mutations	RNF213	0.519504	944	0.0370763	2	296	0.0337838	0.61982	0.768043
TCGA-BRCA	Presence of SNV mutations	RNF43	0.581897	944	0.0105932	0	336	0.0119048	0.82609	0.905867
TCGA-BRCA	Presence of SNV mutations	RNF43	0.614764	944	0.0105932	1	312	0.00961538	0.82609	0.905867
TCGA-BRCA	Presence of SNV mutations	RNF43	0.679354	944	0.0105932	2	296	0.0101351	0.82609	0.905867
TCGA-BRCA	Presence of SNV mutations	ROS1	0.543056	944	0.0201271	0	335	0.0208955	0.0601162	0.133294
TCGA-BRCA	Presence of SNV mutations	ROS1	0.793706	944	0.0201271	1	313	0.0191693	0.0601162	0.133294
TCGA-BRCA	Presence of SNV mutations	ROS1	0.629953	944	0.0201271	2	296	0.0202703	0.0601162	0.133294
TCGA-BRCA	Presence of SNV mutations	RUNX1	0.631633	944	0.0434322	0	335	0.041791	0.00883885	0.0284353
TCGA-BRCA	Presence of SNV mutations	RUNX1	0.682934	944	0.0434322	1	312	0.0416667	0.00883885	0.0284353
TCGA-BRCA	Presence of SNV mutations	RUNX1	0.691205	944	0.0434322	2	297	0.047138	0.00883885	0.0284353
TCGA-BRCA	Presence of SNV mutations	RUNX1T1	0.584483	944	0.0116525	0	336	0.0119048	0.81379	0.896281
TCGA-BRCA	Presence of SNV mutations	RUNX1T1	0.677047	944	0.0116525	1	311	0.0096463	0.81379	0.896281
TCGA-BRCA	Presence of SNV mutations	RUNX1T1	0.38985	944	0.0116525	2	297	0.013468	0.81379	0.896281
TCGA-BRCA	Presence of SNV mutations	SETD2	0.55045	944	0.0222458	0	334	0.0209581	0.234963	0.388171
TCGA-BRCA	Presence of SNV mutations	SETD2	0.636863	944	0.0222458	1	314	0.022293	0.234963	0.388171
TCGA-BRCA	Presence of SNV mutations	SETD2	0.5599	944	0.0222458	2	296	0.0236486	0.234963	0.388171
TCGA-BRCA	Presence of SNV mutations	SF3B1	0.759582	944	0.0201271	0	335	0.0179104	1.75081e-05	0.000141433
TCGA-BRCA	Presence of SNV mutations	SF3B1	0.813589	944	0.0201271	1	313	0.0223642	1.75081e-05	0.000141433
TCGA-BRCA	Presence of SNV mutations	SF3B1	0.667249	944	0.0201271	2	296	0.0202703	1.75081e-05	0.000141433
TCGA-BRCA	Presence of SNV mutations	SMARCA4	0.555556	944	0.0158898	0	334	0.0149701	0.681977	0.811549
TCGA-BRCA	Presence of SNV mutations	SMARCA4	0.492361	944	0.0158898	1	314	0.0159236	0.681977	0.811549
TCGA-BRCA	Presence of SNV mutations	SMARCA4	0.520557	944	0.0158898	2	296	0.0168919	0.681977	0.811549
TCGA-BRCA	Presence of SNV mutations	SPEN	0.521277	944	0.0381356	0	336	0.0357143	0.746465	0.855051
TCGA-BRCA	Presence of SNV mutations	SPEN	0.538014	944	0.0381356	1	312	0.0384615	0.746465	0.855051
TCGA-BRCA	Presence of SNV mutations	SPEN	0.681333	944	0.0381356	2	296	0.0405405	0.746465	0.855051
TCGA-BRCA	Presence of SNV mutations	STAG2	0.6875	944	0.0190678	0	336	0.0208333	0.0315673	0.0801812
TCGA-BRCA	Presence of SNV mutations	STAG2	0.595819	944	0.0190678	1	311	0.0160772	0.0315673	0.0801812
TCGA-BRCA	Presence of SNV mutations	STAG2	0.64878	944	0.0190678	2	297	0.020202	0.0315673	0.0801812
TCGA-BRCA	Presence of SNV mutations	STAT6	0.512111	944	0.0137712	0	335	0.0119403	0.678189	0.809624
TCGA-BRCA	Presence of SNV mutations	STAT6	0.641003	944	0.0137712	1	313	0.0159744	0.678189	0.809624
TCGA-BRCA	Presence of SNV mutations	STAT6	0.637153	944	0.0137712	2	296	0.0135135	0.678189	0.809624
TCGA-BRCA	Presence of SNV mutations	TBL1XR1	0.699138	944	0.0116525	0	336	0.0119048	0.801766	0.889511
TCGA-BRCA	Presence of SNV mutations	TBL1XR1	0.429066	944	0.0116525	1	312	0.0128205	0.801766	0.889511
TCGA-BRCA	Presence of SNV mutations	TBL1XR1	0.863899	944	0.0116525	2	296	0.0101351	0.801766	0.889511
TCGA-BRCA	Presence of SNV mutations	TBX3	0.592843	944	0.0402542	0	335	0.0447761	0.178878	0.312823
TCGA-BRCA	Presence of SNV mutations	TBX3	0.731141	944	0.0402542	1	313	0.0383387	0.178878	0.312823
TCGA-BRCA	Presence of SNV mutations	TBX3	0.706891	944	0.0402542	2	296	0.0371622	0.178878	0.312823
TCGA-BRCA	Presence of SNV mutations	TET1	0.731834	944	0.0158898	0	335	0.0119403	0.83703	0.912156
TCGA-BRCA	Presence of SNV mutations	TET1	0.558824	944	0.0158898	1	311	0.0160772	0.83703	0.912156
TCGA-BRCA	Presence of SNV mutations	TET1	0.547743	944	0.0158898	2	298	0.0201342	0.83703	0.912156
TCGA-BRCA	Presence of SNV mutations	TET2	0.543966	944	0.0116525	0	337	0.0148368	0.141769	0.261184
TCGA-BRCA	Presence of SNV mutations	TET2	0.630911	944	0.0116525	1	311	0.0096463	0.141769	0.261184
TCGA-BRCA	Presence of SNV mutations	TET2	0.814302	944	0.0116525	2	296	0.0101351	0.141769	0.261184
TCGA-BRCA	Presence of SNV mutations	TP53	0.755552	944	0.358051	0	334	0.350299	1.02151e-48	4.57522e-46
TCGA-BRCA	Presence of SNV mutations	TP53	0.814491	944	0.358051	1	314	0.359873	1.02151e-48	4.57522e-46
TCGA-BRCA	Presence of SNV mutations	TP53	0.785149	944	0.358051	2	296	0.364865	1.02151e-48	4.57522e-46
TCGA-BRCA	Presence of SNV mutations	TPR	0.560234	944	0.0275424	0	336	0.0267857	0.852993	0.921333
TCGA-BRCA	Presence of SNV mutations	TPR	0.569542	944	0.0275424	1	312	0.0288462	0.852993	0.921333
TCGA-BRCA	Presence of SNV mutations	TPR	0.475352	944	0.0275424	2	296	0.027027	0.852993	0.921333
TCGA-BRCA	Presence of SNV mutations	TRIP11	0.645329	944	0.0137712	0	335	0.0119403	0.95088	0.973584
TCGA-BRCA	Presence of SNV mutations	TRIP11	0.629758	944	0.0137712	1	313	0.0159744	0.95088	0.973584
TCGA-BRCA	Presence of SNV mutations	TRIP11	0.657986	944	0.0137712	2	296	0.0135135	0.95088	0.973584
TCGA-BRCA	Presence of SNV mutations	TRRAP	0.638889	944	0.0169492	0	334	0.0149701	0.171927	0.302901
TCGA-BRCA	Presence of SNV mutations	TRRAP	0.588194	944	0.0169492	1	314	0.0191083	0.171927	0.302901
TCGA-BRCA	Presence of SNV mutations	TRRAP	0.6	944	0.0169492	2	296	0.0168919	0.171927	0.302901
TCGA-BRCA	Presence of SNV mutations	TSC1	0.593103	944	0.0116525	0	336	0.0119048	0.406	0.582419
TCGA-BRCA	Presence of SNV mutations	TSC1	0.821223	944	0.0116525	1	311	0.0096463	0.406	0.582419
TCGA-BRCA	Presence of SNV mutations	TSC1	0.705882	944	0.0116525	2	297	0.013468	0.406	0.582419
TCGA-BRCA	Presence of SNV mutations	UBR5	0.729271	944	0.0243644	0	335	0.0238806	0.0163952	0.0469383
TCGA-BRCA	Presence of SNV mutations	UBR5	0.751748	944	0.0243644	1	312	0.0224359	0.0163952	0.0469383
TCGA-BRCA	Presence of SNV mutations	UBR5	0.778947	944	0.0243644	2	297	0.026936	0.0163952	0.0469383
TCGA-BRCA	Presence of SNV mutations	WAS	0.420833	944	0.0180085	0	335	0.0179104	0.891909	0.940433
TCGA-BRCA	Presence of SNV mutations	WAS	0.56875	944	0.0180085	1	313	0.0223642	0.891909	0.940433
TCGA-BRCA	Presence of SNV mutations	WAS	0.773438	944	0.0180085	2	296	0.0135135	0.891909	0.940433
TCGA-BRCA	Presence of SNV mutations	XPO1	0.47474	944	0.0137712	0	336	0.014881	0.674752	0.80745
TCGA-BRCA	Presence of SNV mutations	XPO1	0.764757	944	0.0137712	1	312	0.0128205	0.674752	0.80745
TCGA-BRCA	Presence of SNV mutations	XPO1	0.622396	944	0.0137712	2	296	0.0135135	0.674752	0.80745
TCGA-BRCA	Presence of SNV mutations	ZMYM2	0.556034	944	0.0116525	0	336	0.014881	0.77673	0.875314
TCGA-BRCA	Presence of SNV mutations	ZMYM2	0.707036	944	0.0116525	1	312	0.00961538	0.77673	0.875314
TCGA-BRCA	Presence of SNV mutations	ZMYM2	0.54902	944	0.0116525	2	296	0.0101351	0.77673	0.875314
TCGA-BRCA	Presence of SNV mutations	ZNF384	0.65778	944	0.0264831	0	335	0.0268657	0.163758	0.291696
TCGA-BRCA	Presence of SNV mutations	ZNF384	0.712281	944	0.0264831	1	313	0.028754	0.163758	0.291696
TCGA-BRCA	Presence of SNV mutations	ZNF384	0.717794	944	0.0264831	2	296	0.0236486	0.163758	0.291696
TCGA-BRCA	Protein under/over expression	ABL1_OVER	0.872428	820	0.047561	0	291	0.0515464	7.40131e-08	1.10091e-06
TCGA-BRCA	Protein under/over expression	ABL1_OVER	0.705579	820	0.047561	1	269	0.0446097	7.40131e-08	1.10091e-06
TCGA-BRCA	Protein under/over expression	ABL1_OVER	0.642218	820	0.047561	2	260	0.0461538	7.40131e-08	1.10091e-06
TCGA-BRCA	Protein under/over expression	ABL1_UNDER	0.646423	820	0.0426829	0	290	0.037931	0.007934	0.0260864
TCGA-BRCA	Protein under/over expression	ABL1_UNDER	0.729881	820	0.0426829	1	270	0.0444444	0.007934	0.0260864
TCGA-BRCA	Protein under/over expression	ABL1_UNDER	0.628881	820	0.0426829	2	260	0.0461538	0.007934	0.0260864
TCGA-BRCA	Protein under/over expression	AKT1_OVER	0.556584	820	0.0487805	0	290	0.0517241	0.246216	0.401334
TCGA-BRCA	Protein under/over expression	AKT1_OVER	0.538066	820	0.0487805	1	270	0.0444444	0.246216	0.401334
TCGA-BRCA	Protein under/over expression	AKT1_OVER	0.542011	820	0.0487805	2	260	0.05	0.246216	0.401334
TCGA-BRCA	Protein under/over expression	AKT1_UNDER	0.625523	820	0.0597561	0	291	0.0618557	0.0125744	0.0376579
TCGA-BRCA	Protein under/over expression	AKT1_UNDER	0.600941	820	0.0597561	1	269	0.0594796	0.0125744	0.0376579
TCGA-BRCA	Protein under/over expression	AKT1_UNDER	0.640446	820	0.0597561	2	260	0.0576923	0.0125744	0.0376579
TCGA-BRCA	Protein under/over expression	AKT2_OVER	0.556584	820	0.0487805	0	290	0.0517241	0.246216	0.401334
TCGA-BRCA	Protein under/over expression	AKT2_OVER	0.538066	820	0.0487805	1	270	0.0444444	0.246216	0.401334
TCGA-BRCA	Protein under/over expression	AKT2_OVER	0.542011	820	0.0487805	2	260	0.05	0.246216	0.401334
TCGA-BRCA	Protein under/over expression	AKT2_UNDER	0.625523	820	0.0597561	0	291	0.0618557	0.0125744	0.0376579
TCGA-BRCA	Protein under/over expression	AKT2_UNDER	0.600941	820	0.0597561	1	269	0.0594796	0.0125744	0.0376579
TCGA-BRCA	Protein under/over expression	AKT2_UNDER	0.640446	820	0.0597561	2	260	0.0576923	0.0125744	0.0376579
TCGA-BRCA	Protein under/over expression	AKT3_OVER	0.556584	820	0.0487805	0	290	0.0517241	0.246216	0.401334
TCGA-BRCA	Protein under/over expression	AKT3_OVER	0.538066	820	0.0487805	1	270	0.0444444	0.246216	0.401334
TCGA-BRCA	Protein under/over expression	AKT3_OVER	0.542011	820	0.0487805	2	260	0.05	0.246216	0.401334
TCGA-BRCA	Protein under/over expression	AKT3_UNDER	0.625523	820	0.0597561	0	291	0.0618557	0.0125744	0.0376579
TCGA-BRCA	Protein under/over expression	AKT3_UNDER	0.600941	820	0.0597561	1	269	0.0594796	0.0125744	0.0376579
TCGA-BRCA	Protein under/over expression	AKT3_UNDER	0.640446	820	0.0597561	2	260	0.0576923	0.0125744	0.0376579
TCGA-BRCA	Protein under/over expression	ARID1A_OVER	0.655278	820	0.0585366	0	290	0.0655172	0.0149698	0.0436952
TCGA-BRCA	Protein under/over expression	ARID1A_OVER	0.651111	820	0.0585366	1	270	0.0555556	0.0149698	0.0436952
TCGA-BRCA	Protein under/over expression	ARID1A_OVER	0.756548	820	0.0585366	2	260	0.0538462	0.0149698	0.0436952
TCGA-BRCA	Protein under/over expression	ARID1A_UNDER	0.606484	820	0.052439	0	290	0.0517241	0.0705571	0.151607
TCGA-BRCA	Protein under/over expression	ARID1A_UNDER	0.601716	820	0.052439	1	270	0.0518519	0.0705571	0.151607
TCGA-BRCA	Protein under/over expression	ARID1A_UNDER	0.62879	820	0.052439	2	260	0.0538462	0.0705571	0.151607
TCGA-BRCA	Protein under/over expression	AR_OVER	0.541944	820	0.0512195	0	291	0.0549828	0.0253956	0.0673485
TCGA-BRCA	Protein under/over expression	AR_OVER	0.590909	820	0.0512195	1	269	0.0520446	0.0253956	0.0673485
TCGA-BRCA	Protein under/over expression	AR_OVER	0.68905	820	0.0512195	2	260	0.0461538	0.0253956	0.0673485
TCGA-BRCA	Protein under/over expression	AR_UNDER	0.80903	820	0.1	0	290	0.103448	2.89625e-18	2.12269e-16
TCGA-BRCA	Protein under/over expression	AR_UNDER	0.798428	820	0.1	1	270	0.0962963	2.89625e-18	2.12269e-16
TCGA-BRCA	Protein under/over expression	AR_UNDER	0.735895	820	0.1	2	260	0.1	2.89625e-18	2.12269e-16
TCGA-BRCA	Protein under/over expression	ATM_OVER	0.745709	820	0.0512195	0	290	0.0551724	5.76718e-15	2.87006e-13
TCGA-BRCA	Protein under/over expression	ATM_OVER	0.698665	820	0.0512195	1	270	0.0518519	5.76718e-15	2.87006e-13
TCGA-BRCA	Protein under/over expression	ATM_OVER	0.758953	820	0.0512195	2	260	0.0461538	5.76718e-15	2.87006e-13
TCGA-BRCA	Protein under/over expression	ATM_UNDER	0.566944	820	0.0597561	0	290	0.0655172	0.116395	0.225572
TCGA-BRCA	Protein under/over expression	ATM_UNDER	0.620556	820	0.0597561	1	270	0.0555556	0.116395	0.225572
TCGA-BRCA	Protein under/over expression	ATM_UNDER	0.632078	820	0.0597561	2	260	0.0576923	0.116395	0.225572
TCGA-BRCA	Protein under/over expression	BAP1_UNDER	0.711025	820	0.0597561	0	290	0.0655172	1.65405e-11	4.89187e-10
TCGA-BRCA	Protein under/over expression	BAP1_UNDER	0.801423	820	0.0597561	1	270	0.0592593	1.65405e-11	4.89187e-10
TCGA-BRCA	Protein under/over expression	BAP1_UNDER	0.773214	820	0.0597561	2	260	0.0538462	1.65405e-11	4.89187e-10
TCGA-BRCA	Protein under/over expression	BCL2_OVER	0.730769	820	0.0512195	0	290	0.0517241	0.127953	0.242491
TCGA-BRCA	Protein under/over expression	BCL2_OVER	0.58773	820	0.0512195	1	270	0.0518519	0.127953	0.242491
TCGA-BRCA	Protein under/over expression	BCL2_OVER	0.639004	820	0.0512195	2	260	0.05	0.127953	0.242491
TCGA-BRCA	Protein under/over expression	BCL2_UNDER	0.795319	820	0.0756098	0	290	0.0793103	4.40466e-25	5.38036e-23
TCGA-BRCA	Protein under/over expression	BCL2_UNDER	0.838085	820	0.0756098	1	270	0.0740741	4.40466e-25	5.38036e-23
TCGA-BRCA	Protein under/over expression	BCL2_UNDER	0.855095	820	0.0756098	2	260	0.0730769	4.40466e-25	5.38036e-23
TCGA-BRCA	Protein under/over expression	BRAF_OVER	0.715967	820	0.0756098	0	291	0.0790378	5.40266e-05	0.000383418
TCGA-BRCA	Protein under/over expression	BRAF_OVER	0.751648	820	0.0756098	1	269	0.0743494	5.40266e-05	0.000383418
TCGA-BRCA	Protein under/over expression	BRAF_OVER	0.585687	820	0.0756098	2	260	0.0730769	5.40266e-05	0.000383418
TCGA-BRCA	Protein under/over expression	BRAF_UNDER	0.732365	820	0.052439	0	290	0.0517241	0.000171364	0.00101883
TCGA-BRCA	Protein under/over expression	BRAF_UNDER	0.601956	820	0.052439	1	270	0.0555556	0.000171364	0.00101883
TCGA-BRCA	Protein under/over expression	BRAF_UNDER	0.677625	820	0.052439	2	260	0.05	0.000171364	0.00101883
TCGA-BRCA	Protein under/over expression	BRCA2_OVER	0.642403	820	0.0512195	0	289	0.0519031	0.0281588	0.0728082
TCGA-BRCA	Protein under/over expression	BRCA2_OVER	0.712969	820	0.0512195	1	271	0.0516605	0.0281588	0.0728082
TCGA-BRCA	Protein under/over expression	BRCA2_OVER	0.573572	820	0.0512195	2	260	0.05	0.0281588	0.0728082
TCGA-BRCA	Protein under/over expression	BRCA2_UNDER	0.695833	820	0.0634146	0	292	0.0684932	0.254387	0.411325
TCGA-BRCA	Protein under/over expression	BRCA2_UNDER	0.609205	820	0.0634146	1	268	0.0634328	0.254387	0.411325
TCGA-BRCA	Protein under/over expression	BRCA2_UNDER	0.629289	820	0.0634146	2	260	0.0576923	0.254387	0.411325
TCGA-BRCA	Protein under/over expression	BRD4_OVER	0.871901	820	0.0512195	0	290	0.0551724	6.62268e-20	5.68e-18
TCGA-BRCA	Protein under/over expression	BRD4_OVER	0.766688	820	0.0512195	1	270	0.0518519	6.62268e-20	5.68e-18
TCGA-BRCA	Protein under/over expression	BRD4_OVER	0.826446	820	0.0512195	2	260	0.0461538	6.62268e-20	5.68e-18
TCGA-BRCA	Protein under/over expression	BRD4_UNDER	0.614434	820	0.0646341	0	289	0.0657439	0.050255	0.115825
TCGA-BRCA	Protein under/over expression	BRD4_UNDER	0.693772	820	0.0646341	1	271	0.0664207	0.050255	0.115825
TCGA-BRCA	Protein under/over expression	BRD4_UNDER	0.578256	820	0.0646341	2	260	0.0615385	0.050255	0.115825
TCGA-BRCA	Protein under/over expression	CASP8_OVER	0.651316	820	0.0304878	0	290	0.0344828	0.294689	0.459888
TCGA-BRCA	Protein under/over expression	CASP8_OVER	0.690283	820	0.0304878	1	270	0.0296296	0.294689	0.459888
TCGA-BRCA	Protein under/over expression	CASP8_OVER	0.69867	820	0.0304878	2	260	0.0269231	0.294689	0.459888
TCGA-BRCA	Protein under/over expression	CASP8_UNDER	0.924089	820	0.0353659	0	289	0.0380623	3.67701e-28	5.70077e-26
TCGA-BRCA	Protein under/over expression	CASP8_UNDER	0.86336	820	0.0353659	1	270	0.037037	3.67701e-28	5.70077e-26
TCGA-BRCA	Protein under/over expression	CASP8_UNDER	0.811452	820	0.0353659	2	261	0.0306513	3.67701e-28	5.70077e-26
TCGA-BRCA	Protein under/over expression	CCND1_OVER	0.568723	820	0.0817073	0	289	0.0795848	0.037655	0.0923843
TCGA-BRCA	Protein under/over expression	CCND1_OVER	0.534043	820	0.0817073	1	271	0.0885609	0.037655	0.0923843
TCGA-BRCA	Protein under/over expression	CCND1_OVER	0.588889	820	0.0817073	2	260	0.0769231	0.037655	0.0923843
TCGA-BRCA	Protein under/over expression	CCNE1_OVER	0.771389	820	0.0573171	0	290	0.0586207	2.16493e-17	1.43063e-15
TCGA-BRCA	Protein under/over expression	CCNE1_OVER	0.7625	820	0.0573171	1	270	0.0555556	2.16493e-17	1.43063e-15
TCGA-BRCA	Protein under/over expression	CCNE1_OVER	0.721897	820	0.0573171	2	260	0.0576923	2.16493e-17	1.43063e-15
TCGA-BRCA	Protein under/over expression	CCNE1_UNDER	0.792683	820	0.0390244	0	291	0.0412371	2.07545e-06	2.22442e-05
TCGA-BRCA	Protein under/over expression	CCNE1_UNDER	0.782766	820	0.0390244	1	269	0.0408922	2.07545e-06	2.22442e-05
TCGA-BRCA	Protein under/over expression	CCNE1_UNDER	0.794104	820	0.0390244	2	260	0.0346154	2.07545e-06	2.22442e-05
TCGA-BRCA	Protein under/over expression	CDH1_UNDER	0.740159	820	0.112195	0	289	0.114187	1.2319e-06	1.37938e-05
TCGA-BRCA	Protein under/over expression	CDH1_UNDER	0.68874	820	0.112195	1	271	0.110701	1.2319e-06	1.37938e-05
TCGA-BRCA	Protein under/over expression	CDH1_UNDER	0.794789	820	0.112195	2	260	0.111538	1.2319e-06	1.37938e-05
TCGA-BRCA	Protein under/over expression	CDKN1B_OVER	0.736128	820	0.0573171	0	291	0.0584192	5.68516e-06	5.38565e-05
TCGA-BRCA	Protein under/over expression	CDKN1B_OVER	0.749441	820	0.0573171	1	269	0.0557621	5.68516e-06	5.38565e-05
TCGA-BRCA	Protein under/over expression	CDKN1B_OVER	0.753272	820	0.0573171	2	260	0.0576923	5.68516e-06	5.38565e-05
TCGA-BRCA	Protein under/over expression	CDKN1B_UNDER	0.655305	820	0.0536585	0	290	0.0586207	0.0109394	0.0338945
TCGA-BRCA	Protein under/over expression	CDKN1B_UNDER	0.632187	820	0.0536585	1	270	0.0518519	0.0109394	0.0338945
TCGA-BRCA	Protein under/over expression	CDKN1B_UNDER	0.697734	820	0.0536585	2	260	0.05	0.0109394	0.0338945
TCGA-BRCA	Protein under/over expression	CDKN2A_OVER	0.689638	820	0.0646341	0	291	0.0721649	4.83879e-11	1.30907e-09
TCGA-BRCA	Protein under/over expression	CDKN2A_OVER	0.83062	820	0.0646341	1	269	0.0594796	4.83879e-11	1.30907e-09
TCGA-BRCA	Protein under/over expression	CDKN2A_OVER	0.74291	820	0.0646341	2	260	0.0615385	4.83879e-11	1.30907e-09
TCGA-BRCA	Protein under/over expression	CDKN2A_UNDER	0.527755	820	0.0378049	0	290	0.0344828	0.432556	0.608385
TCGA-BRCA	Protein under/over expression	CDKN2A_UNDER	0.61102	820	0.0378049	1	270	0.0407407	0.432556	0.608385
TCGA-BRCA	Protein under/over expression	CDKN2A_UNDER	0.647541	820	0.0378049	2	260	0.0384615	0.432556	0.608385
TCGA-BRCA	Protein under/over expression	CHEK2_OVER	0.588684	820	0.0536585	0	289	0.0588235	0.0110792	0.0342488
TCGA-BRCA	Protein under/over expression	CHEK2_OVER	0.666561	820	0.0536585	1	271	0.0516605	0.0110792	0.0342488
TCGA-BRCA	Protein under/over expression	CHEK2_OVER	0.661501	820	0.0536585	2	260	0.05	0.0110792	0.0342488
TCGA-BRCA	Protein under/over expression	CHEK2_UNDER	0.482586	820	0.0512195	0	291	0.0515464	0.308949	0.474971
TCGA-BRCA	Protein under/over expression	CHEK2_UNDER	0.680498	820	0.0512195	1	269	0.0520446	0.308949	0.474971
TCGA-BRCA	Protein under/over expression	CHEK2_UNDER	0.541973	820	0.0512195	2	260	0.05	0.308949	0.474971
TCGA-BRCA	Protein under/over expression	CTNNB1_OVER	0.80806	820	0.0463415	0	291	0.0515464	1.00304e-08	1.77335e-07
TCGA-BRCA	Protein under/over expression	CTNNB1_OVER	0.668911	820	0.0463415	1	269	0.0408922	1.00304e-08	1.77335e-07
TCGA-BRCA	Protein under/over expression	CTNNB1_OVER	0.775159	820	0.0463415	2	260	0.0461538	1.00304e-08	1.77335e-07
TCGA-BRCA	Protein under/over expression	CTNNB1_UNDER	0.765319	820	0.0780488	0	290	0.0793103	7.54492e-11	1.93717e-09
TCGA-BRCA	Protein under/over expression	CTNNB1_UNDER	0.776383	820	0.0780488	1	272	0.0808824	7.54492e-11	1.93717e-09
TCGA-BRCA	Protein under/over expression	CTNNB1_UNDER	0.80112	820	0.0780488	2	258	0.0736434	7.54492e-11	1.93717e-09
TCGA-BRCA	Protein under/over expression	EGFR_OVER	0.601399	820	0.047561	0	290	0.0482759	0.0203147	0.0559731
TCGA-BRCA	Protein under/over expression	EGFR_OVER	0.686586	820	0.047561	1	270	0.0481481	0.0203147	0.0559731
TCGA-BRCA	Protein under/over expression	EGFR_OVER	0.61949	820	0.047561	2	260	0.0461538	0.0203147	0.0559731
TCGA-BRCA	Protein under/over expression	ERBB2_OVER	0.679418	820	0.0841463	0	290	0.0827586	2.88185e-05	0.000217542
TCGA-BRCA	Protein under/over expression	ERBB2_OVER	0.636168	820	0.0841463	1	270	0.0814815	2.88185e-05	0.000217542
TCGA-BRCA	Protein under/over expression	ERBB2_OVER	0.72982	820	0.0841463	2	260	0.0884615	2.88185e-05	0.000217542
TCGA-BRCA	Protein under/over expression	ERBB3_OVER	0.672441	820	0.0719512	0	291	0.0790378	3.52402e-08	5.54896e-07
TCGA-BRCA	Protein under/over expression	ERBB3_OVER	0.778484	820	0.0719512	1	269	0.0669145	3.52402e-08	5.54896e-07
TCGA-BRCA	Protein under/over expression	ERBB3_OVER	0.69468	820	0.0719512	2	260	0.0692308	3.52402e-08	5.54896e-07
TCGA-BRCA	Protein under/over expression	ERBB3_UNDER	0.692683	820	0.0365854	0	291	0.0412371	0.0204136	0.0561304
TCGA-BRCA	Protein under/over expression	ERBB3_UNDER	0.717914	820	0.0365854	1	269	0.0334572	0.0204136	0.0561304
TCGA-BRCA	Protein under/over expression	ERBB3_UNDER	0.632653	820	0.0365854	2	260	0.0346154	0.0204136	0.0561304
TCGA-BRCA	Protein under/over expression	ERCC5_OVER	0.801267	820	0.0268293	0	290	0.0310345	0.480233	0.65179
TCGA-BRCA	Protein under/over expression	ERCC5_OVER	0.505184	820	0.0268293	1	270	0.0259259	0.480233	0.65179
TCGA-BRCA	Protein under/over expression	ERCC5_OVER	0.74328	820	0.0268293	2	260	0.0230769	0.480233	0.65179
TCGA-BRCA	Protein under/over expression	ERCC5_UNDER	0.645136	820	0.0609756	0	290	0.0586207	0.0529609	0.120138
TCGA-BRCA	Protein under/over expression	ERCC5_UNDER	0.671548	820	0.0609756	1	270	0.062963	0.0529609	0.120138
TCGA-BRCA	Protein under/over expression	ERCC5_UNDER	0.670168	820	0.0609756	2	260	0.0615385	0.0529609	0.120138
TCGA-BRCA	Protein under/over expression	ESR1_OVER	0.766122	820	0.0439024	0	290	0.0482759	3.04392e-10	7.13374e-09
TCGA-BRCA	Protein under/over expression	ESR1_OVER	0.80449	820	0.0439024	1	270	0.0444444	3.04392e-10	7.13374e-09
TCGA-BRCA	Protein under/over expression	ESR1_OVER	0.853689	820	0.0439024	2	260	0.0384615	3.04392e-10	7.13374e-09
TCGA-BRCA	Protein under/over expression	ESR1_UNDER	0.759613	820	0.052439	0	291	0.0515464	0.000546388	0.00274282
TCGA-BRCA	Protein under/over expression	ESR1_UNDER	0.774405	820	0.052439	1	269	0.0520446	0.000546388	0.00274282
TCGA-BRCA	Protein under/over expression	ESR1_UNDER	0.736607	820	0.052439	2	260	0.0538462	0.000546388	0.00274282
TCGA-BRCA	Protein under/over expression	FOXO3_OVER	0.6475	820	0.054878	0	290	0.0517241	0.570805	0.72584
TCGA-BRCA	Protein under/over expression	FOXO3_OVER	0.560278	820	0.054878	1	270	0.0555556	0.570805	0.72584
TCGA-BRCA	Protein under/over expression	FOXO3_OVER	0.456904	820	0.054878	2	260	0.0576923	0.570805	0.72584
TCGA-BRCA	Protein under/over expression	FOXO3_UNDER	0.51417	820	0.0304878	0	291	0.0309278	0.457325	0.630896
TCGA-BRCA	Protein under/over expression	FOXO3_UNDER	0.841093	820	0.0304878	1	269	0.0334572	0.457325	0.630896
TCGA-BRCA	Protein under/over expression	FOXO3_UNDER	0.607866	820	0.0304878	2	260	0.0269231	0.457325	0.630896
TCGA-BRCA	Protein under/over expression	G6PD_OVER	0.642403	820	0.0487805	0	289	0.0484429	0.0222685	0.0601653
TCGA-BRCA	Protein under/over expression	G6PD_OVER	0.659886	820	0.0487805	1	271	0.0479705	0.0222685	0.0601653
TCGA-BRCA	Protein under/over expression	G6PD_OVER	0.56655	820	0.0487805	2	260	0.05	0.0222685	0.0601653
TCGA-BRCA	Protein under/over expression	G6PD_UNDER	0.620445	820	0.0317073	0	290	0.0344828	3.04585e-06	3.12413e-05
TCGA-BRCA	Protein under/over expression	G6PD_UNDER	0.635628	820	0.0317073	1	270	0.0333333	3.04585e-06	3.12413e-05
TCGA-BRCA	Protein under/over expression	G6PD_UNDER	0.729323	820	0.0317073	2	260	0.0269231	3.04585e-06	3.12413e-05
TCGA-BRCA	Protein under/over expression	GATA3_OVER	0.776195	820	0.05	0	291	0.0549828	1.03195e-11	3.10433e-10
TCGA-BRCA	Protein under/over expression	GATA3_OVER	0.75551	820	0.05	1	269	0.0483271	1.03195e-11	3.10433e-10
TCGA-BRCA	Protein under/over expression	GATA3_OVER	0.68905	820	0.05	2	260	0.0461538	1.03195e-11	3.10433e-10
TCGA-BRCA	Protein under/over expression	GATA3_UNDER	0.795113	820	0.104878	0	291	0.106529	6.82616e-09	1.26221e-07
TCGA-BRCA	Protein under/over expression	GATA3_UNDER	0.739599	820	0.104878	1	269	0.104089	6.82616e-09	1.26221e-07
TCGA-BRCA	Protein under/over expression	GATA3_UNDER	0.688693	820	0.104878	2	260	0.103846	6.82616e-09	1.26221e-07
TCGA-BRCA	Protein under/over expression	JAK2_OVER	0.766129	820	0.0280488	0	291	0.0309278	3.70323e-12	1.18474e-10
TCGA-BRCA	Protein under/over expression	JAK2_OVER	0.856564	820	0.0280488	1	269	0.0260223	3.70323e-12	1.18474e-10
TCGA-BRCA	Protein under/over expression	JAK2_OVER	0.853094	820	0.0280488	2	260	0.0269231	3.70323e-12	1.18474e-10
TCGA-BRCA	Protein under/over expression	JAK2_UNDER	0.754205	820	0.0768293	0	291	0.0756014	0.000383288	0.0020276
TCGA-BRCA	Protein under/over expression	JAK2_UNDER	0.642735	820	0.0768293	1	269	0.0780669	0.000383288	0.0020276
TCGA-BRCA	Protein under/over expression	JAK2_UNDER	0.630556	820	0.0768293	2	260	0.0769231	0.000383288	0.0020276
TCGA-BRCA	Protein under/over expression	KDR_OVER	0.770833	820	0.0609756	0	290	0.0655172	2.46849e-06	2.57119e-05
TCGA-BRCA	Protein under/over expression	KDR_OVER	0.755833	820	0.0609756	1	270	0.062963	2.46849e-06	2.57119e-05
TCGA-BRCA	Protein under/over expression	KDR_OVER	0.6875	820	0.0609756	2	260	0.0538462	2.46849e-06	2.57119e-05
TCGA-BRCA	Protein under/over expression	KDR_UNDER	0.731476	820	0.054878	0	290	0.0517241	0.0239911	0.0642151
TCGA-BRCA	Protein under/over expression	KDR_UNDER	0.616183	820	0.054878	1	270	0.0592593	0.0239911	0.0642151
TCGA-BRCA	Protein under/over expression	KDR_UNDER	0.609821	820	0.054878	2	260	0.0538462	0.0239911	0.0642151
TCGA-BRCA	Protein under/over expression	KIT_OVER	0.741257	820	0.054878	0	290	0.0586207	2.02812e-13	8.60562e-12
TCGA-BRCA	Protein under/over expression	KIT_OVER	0.823651	820	0.054878	1	270	0.0555556	2.02812e-13	8.60562e-12
TCGA-BRCA	Protein under/over expression	KIT_OVER	0.778806	820	0.054878	2	260	0.05	2.02812e-13	8.60562e-12
TCGA-BRCA	Protein under/over expression	LCK_OVER	0.645792	820	0.0695122	0	292	0.0719178	0.0102702	0.0322675
TCGA-BRCA	Protein under/over expression	LCK_OVER	0.674435	820	0.0695122	1	268	0.0671642	0.0102702	0.0322675
TCGA-BRCA	Protein under/over expression	LCK_OVER	0.661723	820	0.0695122	2	260	0.0692308	0.0102702	0.0322675
TCGA-BRCA	Protein under/over expression	LCK_UNDER	0.582305	820	0.045122	0	290	0.0482759	0.00391602	0.014475
TCGA-BRCA	Protein under/over expression	LCK_UNDER	0.538066	820	0.045122	1	270	0.0444444	0.00391602	0.014475
TCGA-BRCA	Protein under/over expression	LCK_UNDER	0.65694	820	0.045122	2	260	0.0423077	0.00391602	0.014475
TCGA-BRCA	Protein under/over expression	MAP2K1_OVER	0.560394	820	0.0512195	0	290	0.0551724	0.0563467	0.126396
TCGA-BRCA	Protein under/over expression	MAP2K1_OVER	0.678322	820	0.0512195	1	270	0.0518519	0.0563467	0.126396
TCGA-BRCA	Protein under/over expression	MAP2K1_OVER	0.604339	820	0.0512195	2	260	0.0461538	0.0563467	0.126396
TCGA-BRCA	Protein under/over expression	MAP2K1_UNDER	0.675163	820	0.0512195	0	290	0.0482759	6.16165e-09	1.16064e-07
TCGA-BRCA	Protein under/over expression	MAP2K1_UNDER	0.698874	820	0.0512195	1	270	0.0518519	6.16165e-09	1.16064e-07
TCGA-BRCA	Protein under/over expression	MAP2K1_UNDER	0.765476	820	0.0512195	2	260	0.0538462	6.16165e-09	1.16064e-07
TCGA-BRCA	Protein under/over expression	MET_UNDER	0.869722	820	0.0634146	0	290	0.0689655	1.12657e-25	1.41912e-23
TCGA-BRCA	Protein under/over expression	MET_UNDER	0.828056	820	0.0634146	1	270	0.0666667	1.12657e-25	1.41912e-23
TCGA-BRCA	Protein under/over expression	MET_UNDER	0.899405	820	0.0634146	2	260	0.0538462	1.12657e-25	1.41912e-23
TCGA-BRCA	Protein under/over expression	MSH2_OVER	0.779444	820	0.054878	0	290	0.0551724	9.30591e-09	1.66721e-07
TCGA-BRCA	Protein under/over expression	MSH2_OVER	0.734722	820	0.054878	1	270	0.0555556	9.30591e-09	1.66721e-07
TCGA-BRCA	Protein under/over expression	MSH2_OVER	0.76131	820	0.054878	2	260	0.0538462	9.30591e-09	1.66721e-07
TCGA-BRCA	Protein under/over expression	MSH2_UNDER	0.82379	820	0.0585366	0	291	0.0618557	1.84872e-07	2.58757e-06
TCGA-BRCA	Protein under/over expression	MSH2_UNDER	0.739583	820	0.0585366	1	269	0.0594796	1.84872e-07	2.58757e-06
TCGA-BRCA	Protein under/over expression	MSH2_UNDER	0.764881	820	0.0585366	2	260	0.0538462	1.84872e-07	2.58757e-06
TCGA-BRCA	Protein under/over expression	MSH6_OVER	0.811666	820	0.0634146	0	289	0.0657439	3.01443e-07	3.9971e-06
TCGA-BRCA	Protein under/over expression	MSH6_OVER	0.7217	820	0.0634146	1	271	0.0627306	3.01443e-07	3.9971e-06
TCGA-BRCA	Protein under/over expression	MSH6_OVER	0.746061	820	0.0634146	2	260	0.0615385	3.01443e-07	3.9971e-06
TCGA-BRCA	Protein under/over expression	MSH6_UNDER	0.570344	820	0.0329268	0	290	0.037931	0.000263594	0.00147371
TCGA-BRCA	Protein under/over expression	MSH6_UNDER	0.592611	820	0.0329268	1	270	0.0296296	0.000263594	0.00147371
TCGA-BRCA	Protein under/over expression	MSH6_UNDER	0.71189	820	0.0329268	2	260	0.0307692	0.000263594	0.00147371
TCGA-BRCA	Protein under/over expression	MTOR_OVER	0.628417	820	0.0536585	0	290	0.0586207	0.0608901	0.13464
TCGA-BRCA	Protein under/over expression	MTOR_OVER	0.585188	820	0.0536585	1	270	0.0518519	0.0608901	0.13464
TCGA-BRCA	Protein under/over expression	MTOR_OVER	0.616047	820	0.0536585	2	260	0.05	0.0608901	0.13464
TCGA-BRCA	Protein under/over expression	MTOR_UNDER	0.611454	820	0.0463415	0	290	0.0448276	0.187232	0.324755
TCGA-BRCA	Protein under/over expression	MTOR_UNDER	0.577846	820	0.0463415	1	270	0.0481481	0.187232	0.324755
TCGA-BRCA	Protein under/over expression	MTOR_UNDER	0.687328	820	0.0463415	2	260	0.0461538	0.187232	0.324755
TCGA-BRCA	Protein under/over expression	MYC_OVER	0.630932	820	0.0731707	0	291	0.0756014	2.05656e-05	0.000163189
TCGA-BRCA	Protein under/over expression	MYC_OVER	0.679731	820	0.0731707	1	269	0.070632	2.05656e-05	0.000163189
TCGA-BRCA	Protein under/over expression	MYC_OVER	0.71355	820	0.0731707	2	260	0.0730769	2.05656e-05	0.000163189
TCGA-BRCA	Protein under/over expression	MYC_UNDER	0.590612	820	0.0402439	0	290	0.0413793	0.0328532	0.0829251
TCGA-BRCA	Protein under/over expression	MYC_UNDER	0.617959	820	0.0402439	1	270	0.0407407	0.0328532	0.0829251
TCGA-BRCA	Protein under/over expression	MYC_UNDER	0.686475	820	0.0402439	2	260	0.0384615	0.0328532	0.0829251
TCGA-BRCA	Protein under/over expression	MYH11_OVER	0.692353	820	0.054878	0	290	0.0551724	2.27782e-16	1.29322e-14
TCGA-BRCA	Protein under/over expression	MYH11_OVER	0.883817	820	0.054878	1	270	0.0592593	2.27782e-16	1.29322e-14
TCGA-BRCA	Protein under/over expression	MYH11_OVER	0.785828	820	0.054878	2	260	0.05	2.27782e-16	1.29322e-14
TCGA-BRCA	Protein under/over expression	MYH9_UNDER	0.700495	697	0.0746055	0	238	0.0798319	1.42799e-05	0.000119672
TCGA-BRCA	Protein under/over expression	MYH9_UNDER	0.638614	697	0.0746055	1	237	0.07173	1.42799e-05	0.000119672
TCGA-BRCA	Protein under/over expression	MYH9_UNDER	0.73948	697	0.0746055	2	222	0.0720721	1.42799e-05	0.000119672
TCGA-BRCA	Protein under/over expression	NF2_OVER	0.661978	820	0.0756098	0	290	0.0793103	0.00123094	0.00537546
TCGA-BRCA	Protein under/over expression	NF2_OVER	0.596109	820	0.0756098	1	270	0.0740741	0.00123094	0.00537546
TCGA-BRCA	Protein under/over expression	NF2_OVER	0.736659	820	0.0756098	2	260	0.0730769	0.00123094	0.00537546
TCGA-BRCA	Protein under/over expression	NF2_UNDER	0.657343	820	0.05	0	290	0.0448276	0.162057	0.289433
TCGA-BRCA	Protein under/over expression	NF2_UNDER	0.733312	820	0.05	1	272	0.0551471	0.162057	0.289433
TCGA-BRCA	Protein under/over expression	NF2_UNDER	0.607086	820	0.05	2	258	0.0503876	0.162057	0.289433
TCGA-BRCA	Protein under/over expression	NOTCH1_OVER	0.644258	820	0.0646341	0	291	0.0652921	0.00866486	0.0279648
TCGA-BRCA	Protein under/over expression	NOTCH1_OVER	0.607099	820	0.0646341	1	269	0.063197	0.00866486	0.0279648
TCGA-BRCA	Protein under/over expression	NOTCH1_OVER	0.521469	820	0.0646341	2	260	0.0653846	0.00866486	0.0279648
TCGA-BRCA	Protein under/over expression	NOTCH1_UNDER	0.651206	820	0.0426829	0	290	0.0482759	0.468971	0.642564
TCGA-BRCA	Protein under/over expression	NOTCH1_UNDER	0.612295	820	0.0426829	1	270	0.0407407	0.468971	0.642564
TCGA-BRCA	Protein under/over expression	NOTCH1_UNDER	0.645082	820	0.0426829	2	260	0.0384615	0.468971	0.642564
TCGA-BRCA	Protein under/over expression	NRAS_OVER	0.710251	820	0.0585366	0	289	0.0588235	4.82508e-05	0.0003467
TCGA-BRCA	Protein under/over expression	NRAS_OVER	0.679655	820	0.0585366	1	271	0.0590406	4.82508e-05	0.0003467
TCGA-BRCA	Protein under/over expression	NRAS_OVER	0.610321	820	0.0585366	2	260	0.0576923	4.82508e-05	0.0003467
TCGA-BRCA	Protein under/over expression	NRG1_OVER	0.621461	820	0.0414634	0	290	0.0413793	0.0200349	0.0554212
TCGA-BRCA	Protein under/over expression	NRG1_OVER	0.660581	820	0.0414634	1	270	0.0444444	0.0200349	0.0554212
TCGA-BRCA	Protein under/over expression	NRG1_OVER	0.70041	820	0.0414634	2	260	0.0384615	0.0200349	0.0554212
TCGA-BRCA	Protein under/over expression	NRG1_UNDER	0.608871	820	0.0292683	0	290	0.0344828	0.000310257	0.00170156
TCGA-BRCA	Protein under/over expression	NRG1_UNDER	0.665899	820	0.0292683	1	270	0.0259259	0.000310257	0.00170156
TCGA-BRCA	Protein under/over expression	NRG1_UNDER	0.86871	820	0.0292683	2	260	0.0269231	0.000310257	0.00170156
TCGA-BRCA	Protein under/over expression	PIK3CA_OVER	0.608571	820	0.0365854	0	290	0.037931	0.331997	0.501416
TCGA-BRCA	Protein under/over expression	PIK3CA_OVER	0.583265	820	0.0365854	1	270	0.037037	0.331997	0.501416
TCGA-BRCA	Protein under/over expression	PIK3CA_OVER	0.579592	820	0.0365854	2	260	0.0346154	0.331997	0.501416
TCGA-BRCA	Protein under/over expression	PIK3CA_UNDER	0.596658	820	0.0341463	0	290	0.0344828	0.000221897	0.00126337
TCGA-BRCA	Protein under/over expression	PIK3CA_UNDER	0.733062	820	0.0341463	1	270	0.0333333	0.000221897	0.00126337
TCGA-BRCA	Protein under/over expression	PIK3CA_UNDER	0.741043	820	0.0341463	2	260	0.0346154	0.000221897	0.00126337
TCGA-BRCA	Protein under/over expression	PIK3R1_OVER	0.656229	820	0.0731707	0	291	0.0756014	0.0134842	0.0398495
TCGA-BRCA	Protein under/over expression	PIK3R1_OVER	0.580744	820	0.0731707	1	269	0.0743494	0.0134842	0.0398495
TCGA-BRCA	Protein under/over expression	PIK3R1_OVER	0.62806	820	0.0731707	2	260	0.0692308	0.0134842	0.0398495
TCGA-BRCA	Protein under/over expression	PIK3R1_UNDER	0.674444	820	0.0597561	0	289	0.0553633	0.00148362	0.00632184
TCGA-BRCA	Protein under/over expression	PIK3R1_UNDER	0.641389	820	0.0597561	1	271	0.0701107	0.00148362	0.00632184
TCGA-BRCA	Protein under/over expression	PIK3R1_UNDER	0.571429	820	0.0597561	2	260	0.0538462	0.00148362	0.00632184
TCGA-BRCA	Protein under/over expression	PTEN_OVER	0.582114	820	0.0390244	0	292	0.0445205	0.540167	0.70126
TCGA-BRCA	Protein under/over expression	PTEN_OVER	0.687982	820	0.0390244	1	268	0.0373134	0.540167	0.70126
TCGA-BRCA	Protein under/over expression	PTEN_OVER	0.629478	820	0.0390244	2	260	0.0346154	0.540167	0.70126
TCGA-BRCA	Protein under/over expression	PTEN_UNDER	0.623958	820	0.0634146	0	291	0.0652921	0.030036	0.076922
TCGA-BRCA	Protein under/over expression	PTEN_UNDER	0.599721	820	0.0634146	1	269	0.0669145	0.030036	0.076922
TCGA-BRCA	Protein under/over expression	PTEN_UNDER	0.676709	820	0.0634146	2	260	0.0576923	0.030036	0.076922
TCGA-BRCA	Protein under/over expression	RAF1_OVER	0.710331	820	0.0682927	0	289	0.0726644	0.0178465	0.0502721
TCGA-BRCA	Protein under/over expression	RAF1_OVER	0.650272	820	0.0682927	1	271	0.0701107	0.0178465	0.0502721
TCGA-BRCA	Protein under/over expression	RAF1_OVER	0.778099	820	0.0682927	2	260	0.0615385	0.0178465	0.0502721
TCGA-BRCA	Protein under/over expression	RAF1_UNDER	0.606484	820	0.0487805	0	290	0.0448276	0.00335859	0.0126646
TCGA-BRCA	Protein under/over expression	RAF1_UNDER	0.585505	820	0.0487805	1	270	0.0518519	0.00335859	0.0126646
TCGA-BRCA	Protein under/over expression	RAF1_UNDER	0.659751	820	0.0487805	2	260	0.05	0.00335859	0.0126646
TCGA-BRCA	Protein under/over expression	RB1_OVER	0.748338	820	0.0463415	0	291	0.04811	4.04491e-06	4.0359e-05
TCGA-BRCA	Protein under/over expression	RB1_OVER	0.68905	820	0.0463415	1	269	0.0446097	4.04491e-06	4.0359e-05
TCGA-BRCA	Protein under/over expression	RB1_OVER	0.77376	820	0.0463415	2	260	0.0461538	4.04491e-06	4.0359e-05
TCGA-BRCA	Protein under/over expression	RB1_UNDER	0.791356	820	0.0439024	0	290	0.0448276	9.00375e-07	1.04594e-05
TCGA-BRCA	Protein under/over expression	RB1_UNDER	0.774218	820	0.0439024	1	270	0.0444444	9.00375e-07	1.04594e-05
TCGA-BRCA	Protein under/over expression	RB1_UNDER	0.804918	820	0.0439024	2	260	0.0423077	9.00375e-07	1.04594e-05
TCGA-BRCA	Protein under/over expression	RBM15_OVER	0.726959	820	0.0243902	0	289	0.0242215	0.0402492	0.0970361
TCGA-BRCA	Protein under/over expression	RBM15_OVER	0.718318	820	0.0243902	1	270	0.0259259	0.0402492	0.0970361
TCGA-BRCA	Protein under/over expression	RBM15_OVER	0.733871	820	0.0243902	2	261	0.0229885	0.0402492	0.0970361
TCGA-BRCA	Protein under/over expression	RBM15_UNDER	0.710394	820	0.0865854	0	291	0.0859107	1.87911e-05	0.000149994
TCGA-BRCA	Protein under/over expression	RBM15_UNDER	0.658307	820	0.0865854	1	269	0.0892193	1.87911e-05	0.000149994
TCGA-BRCA	Protein under/over expression	RBM15_UNDER	0.630878	820	0.0865854	2	260	0.0846154	1.87911e-05	0.000149994
TCGA-BRCA	Protein under/over expression	SETD2_OVER	0.513915	820	0.0378049	0	291	0.0378007	0.104727	0.207783
TCGA-BRCA	Protein under/over expression	SETD2_OVER	0.60123	820	0.0378049	1	269	0.0371747	0.104727	0.207783
TCGA-BRCA	Protein under/over expression	SETD2_OVER	0.654918	820	0.0378049	2	260	0.0384615	0.104727	0.207783
TCGA-BRCA	Protein under/over expression	SETD2_UNDER	0.824529	820	0.0682927	0	290	0.0724138	3.08993e-17	1.97706e-15
TCGA-BRCA	Protein under/over expression	SETD2_UNDER	0.748954	820	0.0682927	1	270	0.0740741	3.08993e-17	1.97706e-15
TCGA-BRCA	Protein under/over expression	SETD2_UNDER	0.869735	820	0.0682927	2	260	0.0576923	3.08993e-17	1.97706e-15
TCGA-BRCA	Protein under/over expression	SMAD4_OVER	0.595188	820	0.0621951	0	290	0.0551724	0.373806	0.547301
TCGA-BRCA	Protein under/over expression	SMAD4_OVER	0.545502	820	0.0621951	1	270	0.062963	0.373806	0.547301
TCGA-BRCA	Protein under/over expression	SMAD4_OVER	0.502363	820	0.0621951	2	260	0.0692308	0.373806	0.547301
TCGA-BRCA	Protein under/over expression	SMAD4_UNDER	0.507607	820	0.0414634	0	291	0.0412371	0.00203083	0.00835334
TCGA-BRCA	Protein under/over expression	SMAD4_UNDER	0.657787	820	0.0414634	1	269	0.0408922	0.00203083	0.00835334
TCGA-BRCA	Protein under/over expression	SMAD4_UNDER	0.829918	820	0.0414634	2	260	0.0423077	0.00203083	0.00835334
TCGA-BRCA	Protein under/over expression	STK11_OVER	0.727248	820	0.0560976	0	291	0.0618557	0.0233134	0.0626092
TCGA-BRCA	Protein under/over expression	STK11_OVER	0.725	820	0.0560976	1	269	0.0520446	0.0233134	0.0626092
TCGA-BRCA	Protein under/over expression	STK11_OVER	0.605952	820	0.0560976	2	260	0.0538462	0.0233134	0.0626092
TCGA-BRCA	Protein under/over expression	STK11_UNDER	0.8053	820	0.0268293	0	290	0.0275862	5.89603e-05	0.000414183
TCGA-BRCA	Protein under/over expression	STK11_UNDER	0.531682	820	0.0268293	1	270	0.0296296	5.89603e-05	0.000414183
TCGA-BRCA	Protein under/over expression	STK11_UNDER	0.742608	820	0.0268293	2	260	0.0230769	5.89603e-05	0.000414183
TCGA-BRCA	Protein under/over expression	SYK_OVER	0.803015	820	0.0682927	0	290	0.0724138	1.15229e-17	7.87269e-16
TCGA-BRCA	Protein under/over expression	SYK_OVER	0.840583	820	0.0682927	1	270	0.0703704	1.15229e-17	7.87269e-16
TCGA-BRCA	Protein under/over expression	SYK_OVER	0.71271	820	0.0682927	2	260	0.0615385	1.15229e-17	7.87269e-16
TCGA-BRCA	Protein under/over expression	SYK_UNDER	0.649573	820	0.0463415	0	291	0.04811	0.0520947	0.118621
TCGA-BRCA	Protein under/over expression	SYK_UNDER	0.61157	820	0.0463415	1	269	0.0446097	0.0520947	0.118621
TCGA-BRCA	Protein under/over expression	SYK_UNDER	0.712466	820	0.0463415	2	260	0.0461538	0.0520947	0.118621
TCGA-BRCA	Protein under/over expression	TFRC_OVER	0.572442	820	0.0829268	0	290	0.0896552	0.012019	0.0364825
TCGA-BRCA	Protein under/over expression	TFRC_OVER	0.669444	820	0.0829268	1	270	0.0814815	0.012019	0.0364825
TCGA-BRCA	Protein under/over expression	TFRC_OVER	0.647863	820	0.0829268	2	260	0.0769231	0.012019	0.0364825
TCGA-BRCA	Protein under/over expression	TFRC_UNDER	0.604322	820	0.0426829	0	290	0.0448276	0.410755	0.587072
TCGA-BRCA	Protein under/over expression	TFRC_UNDER	0.519001	820	0.0426829	1	270	0.0444444	0.410755	0.587072
TCGA-BRCA	Protein under/over expression	TFRC_UNDER	0.656967	820	0.0426829	2	260	0.0384615	0.410755	0.587072
TCGA-BRCA	Protein under/over expression	TP53_OVER	0.694428	820	0.052439	0	290	0.0517241	0.027003	0.0705743
TCGA-BRCA	Protein under/over expression	TP53_OVER	0.620036	820	0.052439	1	270	0.0518519	0.027003	0.0705743
TCGA-BRCA	Protein under/over expression	TP53_OVER	0.720833	820	0.052439	2	260	0.0538462	0.027003	0.0705743
TCGA-BRCA	Protein under/over expression	TP53_UNDER	0.722222	820	0.0695122	0	289	0.0692042	1.31042e-10	3.26068e-09
TCGA-BRCA	Protein under/over expression	TP53_UNDER	0.644866	820	0.0695122	1	271	0.0701107	1.31042e-10	3.26068e-09
TCGA-BRCA	Protein under/over expression	TP53_UNDER	0.825565	820	0.0695122	2	260	0.0692308	1.31042e-10	3.26068e-09
TCGA-BRCA	Protein under/over expression	TSC1_OVER	0.692044	820	0.0487805	0	290	0.0517241	0.303524	0.468776
TCGA-BRCA	Protein under/over expression	TSC1_OVER	0.640261	820	0.0487805	1	270	0.0481481	0.303524	0.468776
TCGA-BRCA	Protein under/over expression	TSC1_OVER	0.634642	820	0.0487805	2	260	0.0461538	0.303524	0.468776
TCGA-BRCA	Protein under/over expression	TSC1_UNDER	0.73029	820	0.0621951	0	293	0.0682594	1.86473e-08	3.06805e-07
TCGA-BRCA	Protein under/over expression	TSC1_UNDER	0.690179	820	0.0621951	1	268	0.0634328	1.86473e-08	3.06805e-07
TCGA-BRCA	Protein under/over expression	TSC1_UNDER	0.685714	820	0.0621951	2	259	0.0540541	1.86473e-08	3.06805e-07
TCGA-BRCA	Protein under/over expression	TSC2_OVER	0.670501	820	0.0439024	0	291	0.0515464	3.94857e-06	3.94955e-05
TCGA-BRCA	Protein under/over expression	TSC2_OVER	0.703279	820	0.0439024	1	269	0.0408922	3.94857e-06	3.94955e-05
TCGA-BRCA	Protein under/over expression	TSC2_OVER	0.713115	820	0.0439024	2	260	0.0384615	3.94857e-06	3.94955e-05
TCGA-BRCA	Protein under/over expression	TSC2_UNDER	0.575715	820	0.0670732	0	289	0.0657439	0.0380329	0.0929864
TCGA-BRCA	Protein under/over expression	TSC2_UNDER	0.612752	820	0.0670732	1	271	0.0701107	0.0380329	0.0929864
TCGA-BRCA	Protein under/over expression	TSC2_UNDER	0.566145	820	0.0670732	2	260	0.0653846	0.0380329	0.0929864
TCGA-BRCA	Protein under/over expression	WWTR1_OVER	0.667487	820	0.0609756	0	291	0.0618557	0.27321	0.432598
TCGA-BRCA	Protein under/over expression	WWTR1_OVER	0.684874	820	0.0609756	1	269	0.0594796	0.27321	0.432598
TCGA-BRCA	Protein under/over expression	WWTR1_OVER	0.584034	820	0.0609756	2	260	0.0615385	0.27321	0.432598
TCGA-BRCA	Gene signatures and molecular subtypes	BRCA_Subtype_PAM50_Basal	0.859584	1046	0.172084	0	371	0.175202	1.74206e-77	1.40445e-74
TCGA-BRCA	Gene signatures and molecular subtypes	BRCA_Subtype_PAM50_Basal	0.888345	1046	0.172084	1	349	0.166189	1.74206e-77	1.40445e-74
TCGA-BRCA	Gene signatures and molecular subtypes	BRCA_Subtype_PAM50_Basal	0.865975	1046	0.172084	2	326	0.174847	1.74206e-77	1.40445e-74
TCGA-BRCA	Gene signatures and molecular subtypes	BRCA_Subtype_PAM50_Her2	0.766093	1046	0.0707457	0	371	0.0673854	1.4245e-07	2.03623e-06
TCGA-BRCA	Gene signatures and molecular subtypes	BRCA_Subtype_PAM50_Her2	0.70485	1046	0.0707457	1	349	0.0716332	1.4245e-07	2.03623e-06
TCGA-BRCA	Gene signatures and molecular subtypes	BRCA_Subtype_PAM50_Her2	0.686462	1046	0.0707457	2	326	0.0736196	1.4245e-07	2.03623e-06
TCGA-BRCA	Gene signatures and molecular subtypes	BRCA_Subtype_PAM50_LumA	0.790166	1046	0.513384	0	371	0.501348	1.00323e-65	6.74002e-63
TCGA-BRCA	Gene signatures and molecular subtypes	BRCA_Subtype_PAM50_LumA	0.776974	1046	0.513384	1	350	0.522857	1.00323e-65	6.74002e-63
TCGA-BRCA	Gene signatures and molecular subtypes	BRCA_Subtype_PAM50_LumA	0.827116	1046	0.513384	2	325	0.516923	1.00323e-65	6.74002e-63
TCGA-BRCA	Gene signatures and molecular subtypes	BRCA_Subtype_PAM50_LumB	0.746546	1046	0.211281	0	371	0.22372	2.96877e-14	1.40789e-12
TCGA-BRCA	Gene signatures and molecular subtypes	BRCA_Subtype_PAM50_LumB	0.659358	1046	0.211281	1	349	0.209169	2.96877e-14	1.40789e-12
TCGA-BRCA	Gene signatures and molecular subtypes	BRCA_Subtype_PAM50_LumB	0.676805	1046	0.211281	2	326	0.199387	2.96877e-14	1.40789e-12
TCGA-BRCA	Gene signatures and molecular subtypes	BRCA_Subtype_PAM50_Normal	0.733026	1046	0.0325048	0	371	0.0350404	0.0172719	0.0489269
TCGA-BRCA	Gene signatures and molecular subtypes	BRCA_Subtype_PAM50_Normal	0.669841	1046	0.0325048	1	349	0.0315186	0.0172719	0.0489269
TCGA-BRCA	Gene signatures and molecular subtypes	BRCA_Subtype_PAM50_Normal	0.63619	1046	0.0325048	2	326	0.0306748	0.0172719	0.0489269
TCGA-BRCA	Gene signatures and molecular subtypes	DendriticCellsActivated	0.650629	1044	0.14751	0	372	0.145161	2.16029e-10	5.09247e-09
TCGA-BRCA	Gene signatures and molecular subtypes	DendriticCellsActivated	0.589086	1044	0.14751	1	344	0.15407	2.16029e-10	5.09247e-09
TCGA-BRCA	Gene signatures and molecular subtypes	DendriticCellsActivated	0.604087	1044	0.14751	2	328	0.143293	2.16029e-10	5.09247e-09
TCGA-BRCA	Gene signatures and molecular subtypes	HomologousRecombinationDefects	0.713149	1006	0.394632	0	356	0.382022	3.57681e-27	5.34005e-25
TCGA-BRCA	Gene signatures and molecular subtypes	HomologousRecombinationDefects	0.740809	1006	0.394632	1	333	0.402402	3.57681e-27	5.34005e-25
TCGA-BRCA	Gene signatures and molecular subtypes	HomologousRecombinationDefects	0.691574	1006	0.394632	2	317	0.400631	3.57681e-27	5.34005e-25
TCGA-BRCA	Gene signatures and molecular subtypes	IFN_gammaResponse	0.592131	1044	0.483716	0	371	0.490566	2.34137e-06	2.45783e-05
TCGA-BRCA	Gene signatures and molecular subtypes	IFN_gammaResponse	0.632909	1044	0.483716	1	345	0.478261	2.34137e-06	2.45783e-05
TCGA-BRCA	Gene signatures and molecular subtypes	IFN_gammaResponse	0.581854	1044	0.483716	2	328	0.481707	2.34137e-06	2.45783e-05
TCGA-BRCA	Gene signatures and molecular subtypes	ImmuneSubtype_C1	0.527164	1044	0.328544	0	372	0.325269	0.0410976	0.0987272
TCGA-BRCA	Gene signatures and molecular subtypes	ImmuneSubtype_C1	0.562776	1044	0.328544	1	343	0.329446	0.0410976	0.0987272
TCGA-BRCA	Gene signatures and molecular subtypes	ImmuneSubtype_C1	0.554621	1044	0.328544	2	329	0.331307	0.0410976	0.0987272
TCGA-BRCA	Gene signatures and molecular subtypes	ImmuneSubtype_C2	0.645516	1044	0.358238	0	372	0.357527	1.8393e-19	1.51311e-17
TCGA-BRCA	Gene signatures and molecular subtypes	ImmuneSubtype_C2	0.739949	1044	0.358238	1	344	0.354651	1.8393e-19	1.51311e-17
TCGA-BRCA	Gene signatures and molecular subtypes	ImmuneSubtype_C2	0.6681	1044	0.358238	2	328	0.362805	1.8393e-19	1.51311e-17
TCGA-BRCA	Gene signatures and molecular subtypes	ImmuneSubtype_C3	0.720535	1044	0.185824	0	372	0.188172	5.27571e-22	5.45292e-20
TCGA-BRCA	Gene signatures and molecular subtypes	ImmuneSubtype_C3	0.714645	1044	0.185824	1	344	0.188953	5.27571e-22	5.45292e-20
TCGA-BRCA	Gene signatures and molecular subtypes	ImmuneSubtype_C3	0.697404	1044	0.185824	2	328	0.179878	5.27571e-22	5.45292e-20
TCGA-BRCA	Gene signatures and molecular subtypes	ImmuneSubtype_C4	0.607383	1044	0.0881226	0	372	0.094086	3.54311e-05	0.000260625
TCGA-BRCA	Gene signatures and molecular subtypes	ImmuneSubtype_C4	0.553318	1044	0.0881226	1	344	0.0843023	3.54311e-05	0.000260625
TCGA-BRCA	Gene signatures and molecular subtypes	ImmuneSubtype_C4	0.714392	1044	0.0881226	2	328	0.0853659	3.54311e-05	0.000260625
TCGA-BRCA	Gene signatures and molecular subtypes	ImmuneSubtype_C6	0.592283	1044	0.039272	0	372	0.0376344	0.901322	0.946153
TCGA-BRCA	Gene signatures and molecular subtypes	ImmuneSubtype_C6	0.589088	1044	0.039272	1	345	0.0434783	0.901322	0.946153
TCGA-BRCA	Gene signatures and molecular subtypes	ImmuneSubtype_C6	0.612981	1044	0.039272	2	327	0.0366972	0.901322	0.946153
TCGA-BRCA	Gene signatures and molecular subtypes	MacrophageRegulation	0.621534	1044	0.517241	0	371	0.51752	6.44014e-13	2.52041e-11
TCGA-BRCA	Gene signatures and molecular subtypes	MacrophageRegulation	0.667387	1044	0.517241	1	345	0.515942	6.44014e-13	2.52041e-11
TCGA-BRCA	Gene signatures and molecular subtypes	MacrophageRegulation	0.650857	1044	0.517241	2	328	0.518293	6.44014e-13	2.52041e-11
TCGA-BRCA	Gene signatures and molecular subtypes	Pan_GynClusters_C1	0.698933	856	0.339953	0	301	0.348837	2.6769e-24	3.08303e-22
TCGA-BRCA	Gene signatures and molecular subtypes	Pan_GynClusters_C1	0.741256	856	0.339953	1	280	0.332143	2.6769e-24	3.08303e-22
TCGA-BRCA	Gene signatures and molecular subtypes	Pan_GynClusters_C1	0.695487	856	0.339953	2	275	0.338182	2.6769e-24	3.08303e-22
TCGA-BRCA	Gene signatures and molecular subtypes	Pan_GynClusters_C2	0.728941	856	0.0619159	0	303	0.0594059	0.0312994	0.0796888
TCGA-BRCA	Gene signatures and molecular subtypes	Pan_GynClusters_C2	0.609412	856	0.0619159	1	279	0.0681004	0.0312994	0.0796888
TCGA-BRCA	Gene signatures and molecular subtypes	Pan_GynClusters_C2	0.574046	856	0.0619159	2	274	0.0583942	0.0312994	0.0796888
TCGA-BRCA	Gene signatures and molecular subtypes	Pan_GynClusters_C3	0.705901	856	0.226636	0	302	0.225166	3.03667e-18	2.18586e-16
TCGA-BRCA	Gene signatures and molecular subtypes	Pan_GynClusters_C3	0.815578	856	0.226636	1	280	0.228571	3.03667e-18	2.18586e-16
TCGA-BRCA	Gene signatures and molecular subtypes	Pan_GynClusters_C3	0.670203	856	0.226636	2	274	0.226277	3.03667e-18	2.18586e-16
TCGA-BRCA	Gene signatures and molecular subtypes	Pan_GynClusters_C4	0.687016	856	0.162383	0	303	0.161716	0.000415394	0.00216617
TCGA-BRCA	Gene signatures and molecular subtypes	Pan_GynClusters_C4	0.565544	856	0.162383	1	278	0.161871	0.000415394	0.00216617
TCGA-BRCA	Gene signatures and molecular subtypes	Pan_GynClusters_C4	0.650329	856	0.162383	2	275	0.163636	0.000415394	0.00216617
TCGA-BRCA	Gene signatures and molecular subtypes	Pan_GynClusters_C5	0.589455	856	0.209112	0	302	0.208609	0.00138551	0.0059478
TCGA-BRCA	Gene signatures and molecular subtypes	Pan_GynClusters_C5	0.596726	856	0.209112	1	279	0.21147	0.00138551	0.0059478
TCGA-BRCA	Gene signatures and molecular subtypes	Pan_GynClusters_C5	0.640327	856	0.209112	2	275	0.207273	0.00138551	0.0059478
TCGA-BRCA	Gene signatures and molecular subtypes	Proliferation	0.780914	1044	0.529693	0	373	0.538874	2.21104e-45	7.42724e-43
TCGA-BRCA	Gene signatures and molecular subtypes	Proliferation	0.768597	1044	0.529693	1	344	0.517442	2.21104e-45	7.42724e-43
TCGA-BRCA	Gene signatures and molecular subtypes	Proliferation	0.794178	1044	0.529693	2	327	0.53211	2.21104e-45	7.42724e-43
TCGA-BRCA	Gene signatures and molecular subtypes	TCGASubtype_BRCA_Basal	0.861462	1046	0.152964	0	368	0.154891	6.06817e-80	6.1152e-77
TCGA-BRCA	Gene signatures and molecular subtypes	TCGASubtype_BRCA_Basal	0.887487	1046	0.152964	1	349	0.148997	6.06817e-80	6.1152e-77
TCGA-BRCA	Gene signatures and molecular subtypes	TCGASubtype_BRCA_Basal	0.829755	1046	0.152964	2	329	0.155015	6.06817e-80	6.1152e-77
TCGA-BRCA	Gene signatures and molecular subtypes	TCGASubtype_BRCA_Her2	0.666268	1046	0.0621415	0	366	0.0601093	3.55997e-14	1.64945e-12
TCGA-BRCA	Gene signatures and molecular subtypes	TCGASubtype_BRCA_Her2	0.750748	1046	0.0621415	1	350	0.0628571	3.55997e-14	1.64945e-12
TCGA-BRCA	Gene signatures and molecular subtypes	TCGASubtype_BRCA_Her2	0.837719	1046	0.0621415	2	330	0.0636364	3.55997e-14	1.64945e-12
TCGA-BRCA	Gene signatures and molecular subtypes	TCGASubtype_BRCA_LumA	0.781949	1046	0.459847	0	368	0.456522	2.45899e-53	1.41603e-50
TCGA-BRCA	Gene signatures and molecular subtypes	TCGASubtype_BRCA_LumA	0.782479	1046	0.459847	1	349	0.458453	2.45899e-53	1.41603e-50
TCGA-BRCA	Gene signatures and molecular subtypes	TCGASubtype_BRCA_LumA	0.759458	1046	0.459847	2	329	0.465046	2.45899e-53	1.41603e-50
TCGA-BRCA	Gene signatures and molecular subtypes	TCGASubtype_BRCA_LumB	0.717853	1046	0.194073	0	369	0.203252	2.8856e-20	2.64361e-18
TCGA-BRCA	Gene signatures and molecular subtypes	TCGASubtype_BRCA_LumB	0.685103	1046	0.194073	1	347	0.193084	2.8856e-20	2.64361e-18
TCGA-BRCA	Gene signatures and molecular subtypes	TCGASubtype_BRCA_LumB	0.685357	1046	0.194073	2	330	0.184848	2.8856e-20	2.64361e-18
TCGA-BRCA	Gene signatures and molecular subtypes	TCGASubtype_BRCA_Normal	0.731038	1046	0.130975	0	367	0.128065	4.64386e-19	3.59988e-17
TCGA-BRCA	Gene signatures and molecular subtypes	TCGASubtype_BRCA_Normal	0.71337	1046	0.130975	1	349	0.137536	4.64386e-19	3.59988e-17
TCGA-BRCA	Gene signatures and molecular subtypes	TCGASubtype_BRCA_Normal	0.727074	1046	0.130975	2	330	0.127273	4.64386e-19	3.59988e-17
TCGA-BRCA	Gene signatures and molecular subtypes	TCellsCD8	0.617474	1044	0.421456	0	371	0.433962	5.2403e-07	6.58719e-06
TCGA-BRCA	Gene signatures and molecular subtypes	TCellsCD8	0.602031	1044	0.421456	1	344	0.409884	5.2403e-07	6.58719e-06
TCGA-BRCA	Gene signatures and molecular subtypes	TCellsCD8	0.572348	1044	0.421456	2	329	0.419453	5.2403e-07	6.58719e-06
TCGA-BRCA	Gene signatures and molecular subtypes	TGF_betaResponse	0.704756	1044	0.551724	0	372	0.55914	6.50054e-25	7.70696e-23
TCGA-BRCA	Gene signatures and molecular subtypes	TGF_betaResponse	0.722945	1044	0.551724	1	345	0.547826	6.50054e-25	7.70696e-23
TCGA-BRCA	Gene signatures and molecular subtypes	TGF_betaResponse	0.701445	1044	0.551724	2	327	0.547401	6.50054e-25	7.70696e-23
TCGA-BRCA	Gene signatures and molecular subtypes	WoundHealing	0.749395	1044	0.462644	0	373	0.461126	6.47024e-50	3.26019e-47
TCGA-BRCA	Gene signatures and molecular subtypes	WoundHealing	0.78164	1044	0.462644	1	343	0.457726	6.47024e-50	3.26019e-47
TCGA-BRCA	Gene signatures and molecular subtypes	WoundHealing	0.764793	1044	0.462644	2	328	0.469512	6.47024e-50	3.26019e-47
TCGA-BRCA	Standard clinical biomarkers	BRCA_Pathology_IDC	0.760115	893	0.603583	0	310	0.609677	4.76556e-41	1.28066e-38
TCGA-BRCA	Standard clinical biomarkers	BRCA_Pathology_IDC	0.735754	893	0.603583	1	299	0.595318	4.76556e-41	1.28066e-38
TCGA-BRCA	Standard clinical biomarkers	BRCA_Pathology_IDC	0.780852	893	0.603583	2	284	0.605634	4.76556e-41	1.28066e-38
TCGA-BRCA	Standard clinical biomarkers	BRCA_Pathology_ILC	0.907563	893	0.153415	0	311	0.151125	4.39256e-85	5.90214e-82
TCGA-BRCA	Standard clinical biomarkers	BRCA_Pathology_ILC	0.935237	893	0.153415	1	299	0.160535	4.39256e-85	5.90214e-82
TCGA-BRCA	Standard clinical biomarkers	BRCA_Pathology_ILC	0.883564	893	0.153415	2	283	0.14841	4.39256e-85	5.90214e-82
TCGA-BRCA	Standard clinical biomarkers	BRCA_Pathology_Mixed	0.723373	893	0.106383	0	311	0.102894	5.708e-05	0.000403666
TCGA-BRCA	Standard clinical biomarkers	BRCA_Pathology_Mixed	0.654133	893	0.106383	1	300	0.113333	5.708e-05	0.000403666
TCGA-BRCA	Standard clinical biomarkers	BRCA_Pathology_Mixed	0.683586	893	0.106383	2	282	0.102837	5.708e-05	0.000403666
TCGA-BRCA	Standard clinical biomarkers	BRCA_Pathology_Other	0.770502	893	0.136618	0	313	0.13738	8.43073e-31	1.6183e-28
TCGA-BRCA	Standard clinical biomarkers	BRCA_Pathology_Other	0.834982	893	0.136618	1	298	0.137584	8.43073e-31	1.6183e-28
TCGA-BRCA	Standard clinical biomarkers	BRCA_Pathology_Other	0.732256	893	0.136618	2	282	0.134752	8.43073e-31	1.6183e-28
TCGA-BRCA	Standard clinical biomarkers	ERStatus	0.753019	760	0.781579	0	267	0.786517	1.02902e-29	1.80347e-27
TCGA-BRCA	Standard clinical biomarkers	ERStatus	0.817029	760	0.781579	1	251	0.780876	1.02902e-29	1.80347e-27
TCGA-BRCA	Standard clinical biomarkers	ERStatus	0.848833	760	0.781579	2	242	0.77686	1.02902e-29	1.80347e-27
TCGA-BRCA	Standard clinical biomarkers	HER2FinalStatus	0.582915	748	0.15107	0	258	0.147287	7.695e-05	0.000517839
TCGA-BRCA	Standard clinical biomarkers	HER2FinalStatus	0.617172	748	0.15107	1	249	0.15261	7.695e-05	0.000517839
TCGA-BRCA	Standard clinical biomarkers	HER2FinalStatus	0.709812	748	0.15107	2	241	0.153527	7.695e-05	0.000517839
TCGA-BRCA	Standard clinical biomarkers	PRStatus	0.737059	757	0.680317	0	267	0.681648	3.61208e-26	5.02079e-24
TCGA-BRCA	Standard clinical biomarkers	PRStatus	0.728028	757	0.680317	1	249	0.682731	3.61208e-26	5.02079e-24
TCGA-BRCA	Standard clinical biomarkers	PRStatus	0.769876	757	0.680317	2	241	0.676349	3.61208e-26	5.02079e-24
TCGA-BRCA	Clinical outcomes and treatment responses	DFI	0.678068	915	0.0852459	0	328	0.0853659	1.07322e-08	1.88914e-07
TCGA-BRCA	Clinical outcomes and treatment responses	DFI	0.657778	915	0.0852459	1	299	0.083612	1.07322e-08	1.88914e-07
TCGA-BRCA	Clinical outcomes and treatment responses	DFI	0.69977	915	0.0852459	2	288	0.0868056	1.07322e-08	1.88914e-07
TCGA-BRCA	Clinical outcomes and treatment responses	DSS	0.698997	1041	0.0768492	0	369	0.0758808	5.52983e-15	2.78634e-13
TCGA-BRCA	Clinical outcomes and treatment responses	DSS	0.704482	1041	0.0768492	1	347	0.0778098	5.52983e-15	2.78634e-13
TCGA-BRCA	Clinical outcomes and treatment responses	DSS	0.748993	1041	0.0768492	2	325	0.0769231	5.52983e-15	2.78634e-13
TCGA-BRCA	Clinical outcomes and treatment responses	OS	0.708945	1060	0.135849	0	375	0.128	1.3397e-33	3.00019e-31
TCGA-BRCA	Clinical outcomes and treatment responses	OS	0.772251	1060	0.135849	1	351	0.136752	1.3397e-33	3.00019e-31
TCGA-BRCA	Clinical outcomes and treatment responses	OS	0.789676	1060	0.135849	2	334	0.143713	1.3397e-33	3.00019e-31
TCGA-BRCA	Clinical outcomes and treatment responses	PACLITAXEL_response	0.875	61	0.803279	0	23	0.73913	0.0145415	0.0426304
TCGA-BRCA	Clinical outcomes and treatment responses	PACLITAXEL_response	0.625	61	0.803279	1	20	0.85	0.0145415	0.0426304
TCGA-BRCA	Clinical outcomes and treatment responses	PACLITAXEL_response	0.822222	61	0.803279	2	18	0.833333	0.0145415	0.0426304
TCGA-BRCA	Clinical outcomes and treatment responses	PFI	0.678175	1060	0.129245	0	375	0.125333	3.54514e-11	9.99333e-10
TCGA-BRCA	Clinical outcomes and treatment responses	PFI	0.691162	1060	0.129245	1	352	0.130682	3.54514e-11	9.99333e-10
TCGA-BRCA	Clinical outcomes and treatment responses	PFI	0.68938	1060	0.129245	2	333	0.132132	3.54514e-11	9.99333e-10
TCGA-BRCA	Clinical outcomes and treatment responses	treatment_response	0.599275	984	0.0558943	0	345	0.057971	0.031012	0.0790698
TCGA-BRCA	Clinical outcomes and treatment responses	treatment_response	0.647867	984	0.0558943	1	327	0.0550459	0.031012	0.0790698
TCGA-BRCA	Clinical outcomes and treatment responses	treatment_response	0.674348	984	0.0558943	2	312	0.0544872	0.031012	0.0790698
TCGA-BRCA	Transcriptome under/over expression	ARNT_OVER	0.577831	1056	0.192235	0	371	0.19407	0.0111496	0.0344134
TCGA-BRCA	Transcriptome under/over expression	ARNT_OVER	0.587913	1056	0.192235	1	352	0.1875	0.0111496	0.0344134
TCGA-BRCA	Transcriptome under/over expression	ARNT_OVER	0.54263	1056	0.192235	2	333	0.195195	0.0111496	0.0344134
TCGA-BRCA	Transcriptome under/over expression	ASXL1_OVER	0.562218	1056	0.112689	0	367	0.117166	0.00442058	0.0159529
TCGA-BRCA	Transcriptome under/over expression	ASXL1_OVER	0.660363	1056	0.112689	1	354	0.112994	0.00442058	0.0159529
TCGA-BRCA	Transcriptome under/over expression	ASXL1_OVER	0.572489	1056	0.112689	2	335	0.107463	0.00442058	0.0159529
TCGA-BRCA	Transcriptome under/over expression	AURKA_OVER	0.752535	1056	0.174242	0	367	0.174387	5.11655e-26	6.65317e-24
TCGA-BRCA	Transcriptome under/over expression	AURKA_OVER	0.749714	1056	0.174242	1	353	0.175637	5.11655e-26	6.65317e-24
TCGA-BRCA	Transcriptome under/over expression	AURKA_OVER	0.746215	1056	0.174242	2	336	0.172619	5.11655e-26	6.65317e-24
TCGA-BRCA	Transcriptome under/over expression	AXIN1_OVER	0.682927	1056	0.130682	0	367	0.13079	3.71754e-09	7.30995e-08
TCGA-BRCA	Transcriptome under/over expression	AXIN1_OVER	0.656204	1056	0.130682	1	353	0.133144	3.71754e-09	7.30995e-08
TCGA-BRCA	Transcriptome under/over expression	AXIN1_OVER	0.695479	1056	0.130682	2	336	0.127976	3.71754e-09	7.30995e-08
TCGA-BRCA	Transcriptome under/over expression	BCL11A_OVER	0.804948	1056	0.100379	0	367	0.103542	6.32245e-40	1.59286e-37
TCGA-BRCA	Transcriptome under/over expression	BCL11A_OVER	0.807378	1056	0.100379	1	353	0.0963173	6.32245e-40	1.59286e-37
TCGA-BRCA	Transcriptome under/over expression	BCL11A_OVER	0.85653	1056	0.100379	2	336	0.10119	6.32245e-40	1.59286e-37
TCGA-BRCA	Transcriptome under/over expression	BCL9_OVER	0.605752	1056	0.167614	0	366	0.163934	0.000123563	0.000773419
TCGA-BRCA	Transcriptome under/over expression	BCL9_OVER	0.660119	1056	0.167614	1	354	0.172316	0.000123563	0.000773419
TCGA-BRCA	Transcriptome under/over expression	BCL9_OVER	0.570803	1056	0.167614	2	336	0.166667	0.000123563	0.000773419
TCGA-BRCA	Transcriptome under/over expression	CANT1_OVER	0.680657	1056	0.108902	0	366	0.112022	0.000170326	0.00101566
TCGA-BRCA	Transcriptome under/over expression	CANT1_OVER	0.596796	1056	0.108902	1	354	0.107345	0.000170326	0.00101566
TCGA-BRCA	Transcriptome under/over expression	CANT1_OVER	0.517349	1056	0.108902	2	336	0.107143	0.000170326	0.00101566
TCGA-BRCA	Transcriptome under/over expression	CCNE1_OVER	0.792933	1056	0.11553	0	366	0.120219	1.04493e-45	3.82918e-43
TCGA-BRCA	Transcriptome under/over expression	CCNE1_OVER	0.826551	1056	0.11553	1	354	0.112994	1.04493e-45	3.82918e-43
TCGA-BRCA	Transcriptome under/over expression	CCNE1_OVER	0.854494	1056	0.11553	2	336	0.113095	1.04493e-45	3.82918e-43
TCGA-BRCA	Transcriptome under/over expression	CDC73_OVER	0.526185	1056	0.283144	0	366	0.29235	0.0419055	0.100369
TCGA-BRCA	Transcriptome under/over expression	CDC73_OVER	0.542201	1056	0.283144	1	354	0.285311	0.0419055	0.100369
TCGA-BRCA	Transcriptome under/over expression	CDC73_OVER	0.55139	1056	0.283144	2	336	0.270833	0.0419055	0.100369
TCGA-BRCA	Transcriptome under/over expression	CDK12_OVER	0.693618	1056	0.160038	0	368	0.168478	3.59493e-06	3.63187e-05
TCGA-BRCA	Transcriptome under/over expression	CDK12_OVER	0.594488	1056	0.160038	1	352	0.150568	3.59493e-06	3.63187e-05
TCGA-BRCA	Transcriptome under/over expression	CDK12_OVER	0.671133	1056	0.160038	2	336	0.160714	3.59493e-06	3.63187e-05
TCGA-BRCA	Transcriptome under/over expression	CHCHD7_OVER	0.553832	1056	0.173295	0	366	0.174863	0.0438029	0.104109
TCGA-BRCA	Transcriptome under/over expression	CHCHD7_OVER	0.588959	1056	0.173295	1	354	0.175141	0.0438029	0.104109
TCGA-BRCA	Transcriptome under/over expression	CHCHD7_OVER	0.55972	1056	0.173295	2	336	0.169643	0.0438029	0.104109
TCGA-BRCA	Transcriptome under/over expression	CLTC_OVER	0.684865	1056	0.202652	0	366	0.20765	5.83291e-16	3.17736e-14
TCGA-BRCA	Transcriptome under/over expression	CLTC_OVER	0.666364	1056	0.202652	1	355	0.202817	5.83291e-16	3.17736e-14
TCGA-BRCA	Transcriptome under/over expression	CLTC_OVER	0.659438	1056	0.202652	2	335	0.197015	5.83291e-16	3.17736e-14
TCGA-BRCA	Transcriptome under/over expression	CREBBP_OVER	0.616842	1056	0.13447	0	367	0.13624	2.60144e-07	3.51893e-06
TCGA-BRCA	Transcriptome under/over expression	CREBBP_OVER	0.637799	1056	0.13447	1	353	0.135977	2.60144e-07	3.51893e-06
TCGA-BRCA	Transcriptome under/over expression	CREBBP_OVER	0.633254	1056	0.13447	2	336	0.130952	2.60144e-07	3.51893e-06
TCGA-BRCA	Transcriptome under/over expression	DDX5_OVER	0.589582	1056	0.108902	0	366	0.10929	0.0811047	0.168609
TCGA-BRCA	Transcriptome under/over expression	DDX5_OVER	0.578952	1056	0.108902	1	354	0.107345	0.0811047	0.168609
TCGA-BRCA	Transcriptome under/over expression	DDX5_OVER	0.582469	1056	0.108902	2	336	0.110119	0.0811047	0.168609
TCGA-BRCA	Transcriptome under/over expression	DEK_OVER	0.691192	1056	0.125	0	367	0.128065	4.0095e-31	8.08114e-29
TCGA-BRCA	Transcriptome under/over expression	DEK_OVER	0.755683	1056	0.125	1	353	0.121813	4.0095e-31	8.08114e-29
TCGA-BRCA	Transcriptome under/over expression	DEK_OVER	0.755019	1056	0.125	2	336	0.125	4.0095e-31	8.08114e-29
TCGA-BRCA	Transcriptome under/over expression	EIF3E_OVER	0.613886	1056	0.205492	0	367	0.20436	8.08001e-09	1.46714e-07
TCGA-BRCA	Transcriptome under/over expression	EIF3E_OVER	0.64414	1056	0.205492	1	354	0.20904	8.08001e-09	1.46714e-07
TCGA-BRCA	Transcriptome under/over expression	EIF3E_OVER	0.653342	1056	0.205492	2	335	0.202985	8.08001e-09	1.46714e-07
TCGA-BRCA	Transcriptome under/over expression	ELK4_OVER	0.6525	1056	0.121212	0	367	0.13079	0.000220148	0.00125697
TCGA-BRCA	Transcriptome under/over expression	ELK4_OVER	0.599735	1056	0.121212	1	353	0.116147	0.000220148	0.00125697
TCGA-BRCA	Transcriptome under/over expression	ELK4_OVER	0.661715	1056	0.121212	2	336	0.116071	0.000220148	0.00125697
TCGA-BRCA	Transcriptome under/over expression	ERBB2_OVER	0.57439	1056	0.155303	0	367	0.155313	0.000667851	0.00325921
TCGA-BRCA	Transcriptome under/over expression	ERBB2_OVER	0.632722	1056	0.155303	1	354	0.149718	0.000667851	0.00325921
TCGA-BRCA	Transcriptome under/over expression	ERBB2_OVER	0.594676	1056	0.155303	2	335	0.161194	0.000667851	0.00325921
TCGA-BRCA	Transcriptome under/over expression	ERCC4_OVER	0.700196	1056	0.15625	0	366	0.163934	3.98907e-09	7.80579e-08
TCGA-BRCA	Transcriptome under/over expression	ERCC4_OVER	0.684218	1056	0.15625	1	354	0.152542	3.98907e-09	7.80579e-08
TCGA-BRCA	Transcriptome under/over expression	ERCC4_OVER	0.675967	1056	0.15625	2	336	0.151786	3.98907e-09	7.80579e-08
TCGA-BRCA	Transcriptome under/over expression	ERCC5_UNDER	0.612929	1056	0.148674	0	367	0.147139	0.0881111	0.180475
TCGA-BRCA	Transcriptome under/over expression	ERCC5_UNDER	0.517	1056	0.148674	1	354	0.146893	0.0881111	0.180475
TCGA-BRCA	Transcriptome under/over expression	ERCC5_UNDER	0.547436	1056	0.148674	2	335	0.152239	0.0881111	0.180475
TCGA-BRCA	Transcriptome under/over expression	EXT1_OVER	0.711262	1056	0.108902	0	366	0.10929	2.75258e-12	9.02085e-11
TCGA-BRCA	Transcriptome under/over expression	EXT1_OVER	0.647232	1056	0.108902	1	354	0.110169	2.75258e-12	9.02085e-11
TCGA-BRCA	Transcriptome under/over expression	EXT1_OVER	0.697289	1056	0.108902	2	336	0.107143	2.75258e-12	9.02085e-11
TCGA-BRCA	Transcriptome under/over expression	FH_OVER	0.610756	1056	0.262311	0	367	0.264305	2.32579e-08	3.76516e-07
TCGA-BRCA	Transcriptome under/over expression	FH_OVER	0.633181	1056	0.262311	1	353	0.263456	2.32579e-08	3.76516e-07
TCGA-BRCA	Transcriptome under/over expression	FH_OVER	0.61765	1056	0.262311	2	336	0.258929	2.32579e-08	3.76516e-07
TCGA-BRCA	Transcriptome under/over expression	GMPS_OVER	0.725927	1056	0.15625	0	366	0.15847	4.49042e-26	6.03363e-24
TCGA-BRCA	Transcriptome under/over expression	GMPS_OVER	0.77013	1056	0.15625	1	355	0.152113	4.49042e-26	6.03363e-24
TCGA-BRCA	Transcriptome under/over expression	GMPS_OVER	0.758264	1056	0.15625	2	335	0.158209	4.49042e-26	6.03363e-24
TCGA-BRCA	Transcriptome under/over expression	HOOK3_OVER	0.554483	1056	0.116477	0	366	0.114754	0.298377	0.46367
TCGA-BRCA	Transcriptome under/over expression	HOOK3_OVER	0.543599	1056	0.116477	1	354	0.112994	0.298377	0.46367
TCGA-BRCA	Transcriptome under/over expression	HOOK3_OVER	0.576471	1056	0.116477	2	336	0.122024	0.298377	0.46367
TCGA-BRCA	Transcriptome under/over expression	KAT6A_OVER	0.608655	1056	0.131629	0	366	0.13388	0.120323	0.231514
TCGA-BRCA	Transcriptome under/over expression	KAT6A_OVER	0.528326	1056	0.131629	1	354	0.127119	0.120323	0.231514
TCGA-BRCA	Transcriptome under/over expression	KAT6A_OVER	0.561033	1056	0.131629	2	336	0.133929	0.120323	0.231514
TCGA-BRCA	Transcriptome under/over expression	LASP1_OVER	0.552812	1056	0.114583	0	368	0.119565	0.00760219	0.0251184
TCGA-BRCA	Transcriptome under/over expression	LASP1_OVER	0.624369	1056	0.114583	1	353	0.113314	0.00760219	0.0251184
TCGA-BRCA	Transcriptome under/over expression	LASP1_OVER	0.564317	1056	0.114583	2	335	0.110448	0.00760219	0.0251184
TCGA-BRCA	Transcriptome under/over expression	LSM14A_OVER	0.665014	1056	0.109848	0	367	0.111717	1.43697e-12	5.17181e-11
TCGA-BRCA	Transcriptome under/over expression	LSM14A_OVER	0.749167	1056	0.109848	1	353	0.107649	1.43697e-12	5.17181e-11
TCGA-BRCA	Transcriptome under/over expression	LSM14A_OVER	0.720196	1056	0.109848	2	336	0.110119	1.43697e-12	5.17181e-11
TCGA-BRCA	Transcriptome under/over expression	MDM4_OVER	0.650611	1056	0.206439	0	367	0.212534	1.17863e-06	1.32341e-05
TCGA-BRCA	Transcriptome under/over expression	MDM4_OVER	0.61079	1056	0.206439	1	353	0.206799	1.17863e-06	1.32341e-05
TCGA-BRCA	Transcriptome under/over expression	MDM4_OVER	0.597759	1056	0.206439	2	336	0.199405	1.17863e-06	1.32341e-05
TCGA-BRCA	Transcriptome under/over expression	MUC1_OVER	0.666458	1056	0.182765	0	367	0.174387	1.47315e-05	0.000122692
TCGA-BRCA	Transcriptome under/over expression	MUC1_OVER	0.65076	1056	0.182765	1	353	0.195467	1.47315e-05	0.000122692
TCGA-BRCA	Transcriptome under/over expression	MUC1_OVER	0.551341	1056	0.182765	2	336	0.178571	1.47315e-05	0.000122692
TCGA-BRCA	Transcriptome under/over expression	NBN_OVER	0.638347	1056	0.16572	0	366	0.161202	1.07638e-06	1.22222e-05
TCGA-BRCA	Transcriptome under/over expression	NBN_OVER	0.547003	1056	0.16572	1	354	0.175141	1.07638e-06	1.22222e-05
TCGA-BRCA	Transcriptome under/over expression	NBN_OVER	0.622963	1056	0.16572	2	336	0.160714	1.07638e-06	1.22222e-05
TCGA-BRCA	Transcriptome under/over expression	NCOA2_OVER	0.652672	1056	0.123106	0	366	0.131148	4.51005e-05	0.000324643
TCGA-BRCA	Transcriptome under/over expression	NCOA2_OVER	0.596552	1056	0.123106	1	354	0.121469	4.51005e-05	0.000324643
TCGA-BRCA	Transcriptome under/over expression	NCOA2_OVER	0.603714	1056	0.123106	2	336	0.116071	4.51005e-05	0.000324643
TCGA-BRCA	Transcriptome under/over expression	NDRG1_OVER	0.697683	1056	0.117424	0	366	0.117486	2.59283e-11	7.4655e-10
TCGA-BRCA	Transcriptome under/over expression	NDRG1_OVER	0.678249	1056	0.117424	1	354	0.118644	2.59283e-11	7.4655e-10
TCGA-BRCA	Transcriptome under/over expression	NDRG1_OVER	0.663926	1056	0.117424	2	336	0.116071	2.59283e-11	7.4655e-10
TCGA-BRCA	Transcriptome under/over expression	PALB2_OVER	0.650808	1056	0.171402	0	365	0.178082	1.13127e-09	2.45169e-08
TCGA-BRCA	Transcriptome under/over expression	PALB2_OVER	0.666954	1056	0.171402	1	355	0.169014	1.13127e-09	2.45169e-08
TCGA-BRCA	Transcriptome under/over expression	PALB2_OVER	0.647313	1056	0.171402	2	336	0.166667	1.13127e-09	2.45169e-08
TCGA-BRCA	Transcriptome under/over expression	PBX1_OVER	0.668326	1056	0.125	0	367	0.128065	0.000175887	0.00103655
TCGA-BRCA	Transcriptome under/over expression	PBX1_OVER	0.599424	1056	0.125	1	353	0.124646	0.000175887	0.00103655
TCGA-BRCA	Transcriptome under/over expression	PBX1_OVER	0.598323	1056	0.125	2	336	0.122024	0.000175887	0.00103655
TCGA-BRCA	Transcriptome under/over expression	PMS2_OVER	0.517094	1056	0.107008	0	366	0.103825	0.318312	0.485995
TCGA-BRCA	Transcriptome under/over expression	PMS2_OVER	0.502527	1056	0.107008	1	354	0.112994	0.318312	0.485995
TCGA-BRCA	Transcriptome under/over expression	PMS2_OVER	0.533236	1056	0.107008	2	336	0.104167	0.318312	0.485995
TCGA-BRCA	Transcriptome under/over expression	PRCC_OVER	0.620366	1056	0.335227	0	368	0.328804	2.32124e-07	3.19349e-06
TCGA-BRCA	Transcriptome under/over expression	PRCC_OVER	0.600292	1056	0.335227	1	351	0.339031	2.32124e-07	3.19349e-06
TCGA-BRCA	Transcriptome under/over expression	PRCC_OVER	0.625104	1056	0.335227	2	337	0.338279	2.32124e-07	3.19349e-06
TCGA-BRCA	Transcriptome under/over expression	PRKAR1A_OVER	0.596062	1056	0.129735	0	366	0.139344	0.0262566	0.0691768
TCGA-BRCA	Transcriptome under/over expression	PRKAR1A_OVER	0.592003	1056	0.129735	1	354	0.124294	0.0262566	0.0691768
TCGA-BRCA	Transcriptome under/over expression	PRKAR1A_OVER	0.497428	1056	0.129735	2	336	0.125	0.0262566	0.0691768
TCGA-BRCA	Transcriptome under/over expression	RAC1_OVER	0.561259	1056	0.101326	0	366	0.0983607	0.275431	0.434885
TCGA-BRCA	Transcriptome under/over expression	RAC1_OVER	0.615496	1056	0.101326	1	355	0.104225	0.275431	0.434885
TCGA-BRCA	Transcriptome under/over expression	RAC1_OVER	0.523009	1056	0.101326	2	335	0.101493	0.275431	0.434885
TCGA-BRCA	Transcriptome under/over expression	RAD21_OVER	0.672128	1056	0.309659	0	366	0.311475	6.12155e-11	1.62342e-09
TCGA-BRCA	Transcriptome under/over expression	RAD21_OVER	0.625516	1056	0.309659	1	355	0.309859	6.12155e-11	1.62342e-09
TCGA-BRCA	Transcriptome under/over expression	RAD21_OVER	0.610328	1056	0.309659	2	335	0.307463	6.12155e-11	1.62342e-09
TCGA-BRCA	Transcriptome under/over expression	RAF1_OVER	0.614726	1056	0.113636	0	366	0.117486	4.44647e-07	5.65417e-06
TCGA-BRCA	Transcriptome under/over expression	RAF1_OVER	0.683578	1056	0.113636	1	354	0.110169	4.44647e-07	5.65417e-06
TCGA-BRCA	Transcriptome under/over expression	RAF1_OVER	0.672816	1056	0.113636	2	336	0.113095	4.44647e-07	5.65417e-06
TCGA-BRCA	Transcriptome under/over expression	RECQL4_OVER	0.695906	1056	0.168561	0	366	0.172131	2.01622e-12	7.00635e-11
TCGA-BRCA	Transcriptome under/over expression	RECQL4_OVER	0.721612	1056	0.168561	1	354	0.163842	2.01622e-12	7.00635e-11
TCGA-BRCA	Transcriptome under/over expression	RECQL4_OVER	0.633765	1056	0.168561	2	336	0.169643	2.01622e-12	7.00635e-11
TCGA-BRCA	Transcriptome under/over expression	RMI2_OVER	0.577161	1056	0.109848	0	366	0.112022	0.00018045	0.0010588
TCGA-BRCA	Transcriptome under/over expression	RMI2_OVER	0.623098	1056	0.109848	1	355	0.107042	0.00018045	0.0010588
TCGA-BRCA	Transcriptome under/over expression	RMI2_OVER	0.661625	1056	0.109848	2	335	0.110448	0.00018045	0.0010588
TCGA-BRCA	Transcriptome under/over expression	SDHC_OVER	0.634463	1056	0.391098	0	366	0.393443	2.69589e-12	8.9075e-11
TCGA-BRCA	Transcriptome under/over expression	SDHC_OVER	0.640431	1056	0.391098	1	354	0.39548	2.69589e-12	8.9075e-11
TCGA-BRCA	Transcriptome under/over expression	SDHC_OVER	0.602534	1056	0.391098	2	336	0.383929	2.69589e-12	8.9075e-11
TCGA-BRCA	Transcriptome under/over expression	SMARCE1_OVER	0.542915	1056	0.121212	0	368	0.127717	0.0380389	0.0929864
TCGA-BRCA	Transcriptome under/over expression	SMARCE1_OVER	0.533304	1056	0.121212	1	352	0.113636	0.0380389	0.0929864
TCGA-BRCA	Transcriptome under/over expression	SMARCE1_OVER	0.566869	1056	0.121212	2	336	0.122024	0.0380389	0.0929864
TCGA-BRCA	Transcriptome under/over expression	SPOP_OVER	0.514172	1056	0.106061	0	367	0.108992	0.0112629	0.0346834
TCGA-BRCA	Transcriptome under/over expression	SPOP_OVER	0.627017	1056	0.106061	1	353	0.104816	0.0112629	0.0346834
TCGA-BRCA	Transcriptome under/over expression	SPOP_OVER	0.570554	1056	0.106061	2	336	0.104167	0.0112629	0.0346834
TCGA-BRCA	Transcriptome under/over expression	SS18L1_OVER	0.606577	1056	0.202652	0	367	0.209809	0.00245989	0.0097693
TCGA-BRCA	Transcriptome under/over expression	SS18L1_OVER	0.640381	1056	0.202652	1	354	0.200565	0.00245989	0.0097693
TCGA-BRCA	Transcriptome under/over expression	SS18L1_OVER	0.581281	1056	0.202652	2	335	0.197015	0.00245989	0.0097693
TCGA-BRCA	Transcriptome under/over expression	SUZ12_OVER	0.561224	1056	0.107008	0	367	0.117166	0.0757262	0.160069
TCGA-BRCA	Transcriptome under/over expression	SUZ12_OVER	0.668222	1056	0.107008	1	353	0.0991501	0.0757262	0.160069
TCGA-BRCA	Transcriptome under/over expression	SUZ12_OVER	0.611662	1056	0.107008	2	336	0.104167	0.0757262	0.160069
TCGA-BRCA	Transcriptome under/over expression	TCEA1_OVER	0.570545	1056	0.225379	0	366	0.226776	0.0040129	0.0147457
TCGA-BRCA	Transcriptome under/over expression	TCEA1_OVER	0.56323	1056	0.225379	1	354	0.231638	0.0040129	0.0147457
TCGA-BRCA	Transcriptome under/over expression	TCEA1_OVER	0.552691	1056	0.225379	2	336	0.217262	0.0040129	0.0147457
TCGA-BRCA	Transcriptome under/over expression	TFG_OVER	0.621211	1056	0.102273	0	366	0.101093	8.58691e-07	1.00622e-05
TCGA-BRCA	Transcriptome under/over expression	TFG_OVER	0.679689	1056	0.102273	1	354	0.101695	8.58691e-07	1.00622e-05
TCGA-BRCA	Transcriptome under/over expression	TFG_OVER	0.67036	1056	0.102273	2	336	0.104167	8.58691e-07	1.00622e-05
TCGA-BRCA	Transcriptome under/over expression	TFRC_OVER	0.685652	1056	0.112689	0	366	0.10929	1.23441e-09	2.66091e-08
TCGA-BRCA	Transcriptome under/over expression	TFRC_OVER	0.711788	1056	0.112689	1	355	0.115493	1.23441e-09	2.66091e-08
TCGA-BRCA	Transcriptome under/over expression	TFRC_OVER	0.668896	1056	0.112689	2	335	0.113433	1.23441e-09	2.66091e-08
TCGA-BRCA	Transcriptome under/over expression	TPM3_OVER	0.59387	1056	0.205492	0	367	0.20436	0.000784948	0.0037401
TCGA-BRCA	Transcriptome under/over expression	TPM3_OVER	0.568458	1056	0.205492	1	353	0.209632	0.000784948	0.0037401
TCGA-BRCA	Transcriptome under/over expression	TPM3_OVER	0.603336	1056	0.205492	2	336	0.202381	0.000784948	0.0037401
TCGA-BRCA	Transcriptome under/over expression	TPR_OVER	0.57845	1056	0.244318	0	367	0.250681	0.00183873	0.00765692
TCGA-BRCA	Transcriptome under/over expression	TPR_OVER	0.590512	1056	0.244318	1	353	0.243626	0.00183873	0.00765692
TCGA-BRCA	Transcriptome under/over expression	TPR_OVER	0.566215	1056	0.244318	2	336	0.238095	0.00183873	0.00765692
TCGA-BRCA	Transcriptome under/over expression	TRAF7_OVER	0.600517	1056	0.119318	0	367	0.119891	0.00552554	0.0191847
TCGA-BRCA	Transcriptome under/over expression	TRAF7_OVER	0.59308	1056	0.119318	1	353	0.11898	0.00552554	0.0191847
TCGA-BRCA	Transcriptome under/over expression	TRAF7_OVER	0.624481	1056	0.119318	2	336	0.119048	0.00552554	0.0191847
TCGA-BRCA	Transcriptome under/over expression	TRIM27_OVER	0.579365	1056	0.125947	0	366	0.136612	0.000395104	0.00207648
TCGA-BRCA	Transcriptome under/over expression	TRIM27_OVER	0.555894	1056	0.125947	1	354	0.115819	0.000395104	0.00207648
TCGA-BRCA	Transcriptome under/over expression	TRIM27_OVER	0.670732	1056	0.125947	2	336	0.125	0.000395104	0.00207648
TCGA-BRCA	Transcriptome under/over expression	TSC2_OVER	0.626453	1056	0.160985	0	367	0.149864	0.00261273	0.010255
TCGA-BRCA	Transcriptome under/over expression	TSC2_OVER	0.532928	1056	0.160985	1	354	0.172316	0.00261273	0.010255
TCGA-BRCA	Transcriptome under/over expression	TSC2_OVER	0.560133	1056	0.160985	2	335	0.161194	0.00261273	0.010255
TCGA-BRCA	Transcriptome under/over expression	UBR5_OVER	0.596548	1056	0.225379	0	366	0.229508	7.97215e-06	7.09399e-05
TCGA-BRCA	Transcriptome under/over expression	UBR5_OVER	0.614405	1056	0.225379	1	354	0.228814	7.97215e-06	7.09399e-05
TCGA-BRCA	Transcriptome under/over expression	UBR5_OVER	0.600653	1056	0.225379	2	336	0.217262	7.97215e-06	7.09399e-05
TCGA-BRCA	Transcriptome under/over expression	WWTR1_OVER	0.711844	1056	0.10322	0	367	0.111717	2.60216e-08	4.15319e-07
TCGA-BRCA	Transcriptome under/over expression	WWTR1_OVER	0.691673	1056	0.10322	1	354	0.0988701	2.60216e-08	4.15319e-07
TCGA-BRCA	Transcriptome under/over expression	WWTR1_OVER	0.702003	1056	0.10322	2	335	0.0985075	2.60216e-08	4.15319e-07
TCGA-BRCA	Transcriptome under/over expression	ZNF384_OVER	0.724914	1056	0.123106	0	366	0.120219	4.88127e-17	3.07444e-15
TCGA-BRCA	Transcriptome under/over expression	ZNF384_OVER	0.70319	1056	0.123106	1	355	0.123944	4.88127e-17	3.07444e-15
TCGA-BRCA	Transcriptome under/over expression	ZNF384_OVER	0.682903	1056	0.123106	2	335	0.125373	4.88127e-17	3.07444e-15
TCGA-CESC	Presence of SNV mutations	AFF3	0.927215	257	0.0428016	0	92	0.0434783	8.09695e-13	3.02211e-11
TCGA-CESC	Presence of SNV mutations	AFF3	0.556962	257	0.0428016	1	84	0.047619	8.09695e-13	3.02211e-11
TCGA-CESC	Presence of SNV mutations	AFF3	0.880342	257	0.0428016	2	81	0.037037	8.09695e-13	3.02211e-11
TCGA-CESC	Presence of SNV mutations	ALK	0.613924	257	0.0428016	0	92	0.0543478	0.901615	0.946215
TCGA-CESC	Presence of SNV mutations	ALK	0.586498	257	0.0428016	1	83	0.0361446	0.901615	0.946215
TCGA-CESC	Presence of SNV mutations	ALK	0.552743	257	0.0428016	2	82	0.0365854	0.901615	0.946215
TCGA-CESC	Presence of SNV mutations	APC	0.702532	257	0.0428016	0	92	0.0434783	0.102528	0.204094
TCGA-CESC	Presence of SNV mutations	APC	0.658228	257	0.0428016	1	84	0.047619	0.102528	0.204094
TCGA-CESC	Presence of SNV mutations	APC	0.688034	257	0.0428016	2	81	0.037037	0.102528	0.204094
TCGA-CESC	Presence of SNV mutations	ARID1A	0.404762	257	0.0700389	0	92	0.0652174	0.594827	0.745568
TCGA-CESC	Presence of SNV mutations	ARID1A	0.52193	257	0.0700389	1	83	0.0722892	0.594827	0.745568
TCGA-CESC	Presence of SNV mutations	ARID1A	0.436404	257	0.0700389	2	82	0.0731707	0.594827	0.745568
TCGA-CESC	Presence of SNV mutations	ATM	0.341772	257	0.0428016	0	92	0.0434783	0.471619	0.644658
TCGA-CESC	Presence of SNV mutations	ATM	0.629747	257	0.0428016	1	84	0.047619	0.471619	0.644658
TCGA-CESC	Presence of SNV mutations	ATM	0.529915	257	0.0428016	2	81	0.037037	0.471619	0.644658
TCGA-CESC	Presence of SNV mutations	ATRX	0.523077	257	0.0505837	0	92	0.0543478	0.818925	0.90046
TCGA-CESC	Presence of SNV mutations	ATRX	0.708333	257	0.0505837	1	83	0.0481928	0.818925	0.90046
TCGA-CESC	Presence of SNV mutations	ATRX	0.589744	257	0.0505837	2	82	0.0487805	0.818925	0.90046
TCGA-CESC	Presence of SNV mutations	BCOR	0.914557	257	0.0389105	0	92	0.0434783	0.068709	0.148348
TCGA-CESC	Presence of SNV mutations	BCOR	0.43038	257	0.0389105	1	83	0.0361446	0.068709	0.148348
TCGA-CESC	Presence of SNV mutations	BCOR	0.603376	257	0.0389105	2	82	0.0365854	0.068709	0.148348
TCGA-CESC	Presence of SNV mutations	BRCA1	0.560127	257	0.0428016	0	92	0.0434783	0.936738	0.964739
TCGA-CESC	Presence of SNV mutations	BRCA1	0.588608	257	0.0428016	1	84	0.047619	0.936738	0.964739
TCGA-CESC	Presence of SNV mutations	BRCA1	0.564103	257	0.0428016	2	81	0.037037	0.936738	0.964739
TCGA-CESC	Presence of SNV mutations	BRCA2	0.341772	257	0.0466926	0	92	0.0434783	0.258304	0.415991
TCGA-CESC	Presence of SNV mutations	BRCA2	0.410256	257	0.0466926	1	83	0.0481928	0.258304	0.415991
TCGA-CESC	Presence of SNV mutations	BRCA2	0.480769	257	0.0466926	2	82	0.0487805	0.258304	0.415991
TCGA-CESC	Presence of SNV mutations	CASP8	0.653846	257	0.0505837	0	92	0.0543478	0.515782	0.682125
TCGA-CESC	Presence of SNV mutations	CASP8	0.576923	257	0.0505837	1	83	0.0481928	0.515782	0.682125
TCGA-CESC	Presence of SNV mutations	CASP8	0.628205	257	0.0505837	2	82	0.0487805	0.515782	0.682125
TCGA-CESC	Presence of SNV mutations	CDK12	0.692308	257	0.0505837	0	92	0.0543478	0.761193	0.864573
TCGA-CESC	Presence of SNV mutations	CDK12	0.647436	257	0.0505837	1	83	0.0481928	0.761193	0.864573
TCGA-CESC	Presence of SNV mutations	CDK12	0.682692	257	0.0505837	2	82	0.0487805	0.761193	0.864573
TCGA-CESC	Presence of SNV mutations	CIC	0.702532	257	0.0466926	0	92	0.0434783	0.126457	0.240447
[truncated: 10,094 more rows]

## Sheet: Column Descriptions
Column Name	Description
Cancer Abbr.	TCGA cancer abbrevations
Biomarker Type	Type of biomarker
Biomarker	Name of biomarker
AUC	Area under the receiver operating characteristic curve
# Total Samples	Number of total samples for a biomarker
Positive Ratio	Positve ratio, i.e. prevelance, of a biomarker
Fold	Fold number of a particular model (please note that each biomarker is evaluated with 3-fold cross-validation)
# Samples per Fold	Number of samples per fold (i.e. number of samples used to validate a model)
Positive Ratio per Fold	Positve ratio, i.e. prevelance, within the samples in a fold
p-value	p value of a two-sided t-test performed to asses the statistical significance of the predictability at biomarker level
Corrected p-value	p values corrected for corrected for multiple testing
